# Supplementary material for: Sex-specific mortality prediction by pro-C-type natriuretic peptide measurement in a prospective cohort of patients with ST-elevation myocardial infarction
Source: PubMed Central journal article supplement — BMJ Open. 2021 Sep 28;11(9):e048312. doi: 10.1136/bmjopen-2020-048312 (PMC8480007; doi:10.1136/bmjopen-2020-048312), 2021-09-28
Supplement: bmjopen-2020-048312.draft_revisions.pdf [file bmjopen-2020-048312.draft_revisions.pdf]

# BMJ Open

BMJ Open is committed to open peer review. As part of this commitment we make the peer review history of every article we publish publicly available.

When an article is published we post the peer reviewers' comments and the authors' responses online. We also post the versions of the paper that were used during peer review. These are the versions that the peer review comments apply to.

The versions of the paper that follow are the versions that were submitted during the peer review process. They are not the versions of record or the final published versions. They should not be cited or distributed as the published version of this manuscript.

BMJ Open is an open access journal and the full, final, typeset and author-corrected version of record of the manuscript is available on our site with no access controls, subscription charges or pay-per-view fees (<http://bmjopen.bmj.com>).

If you have any questions on BMJ Open's open peer review process please email [info.bmjopen@bmj.com](mailto:info.bmjopen@bmj.com)

# BMJ Open

## Sex-specific Mortality Prediction by Pro-C-type Natriuretic Peptide Measurement in ST-elevation Myocardial Infarction

|                               |                                                                                                                                                                                                                                                                                                                                                                                                                                                                                                                                                                                                                                                                                                                                             |
|-------------------------------|---------------------------------------------------------------------------------------------------------------------------------------------------------------------------------------------------------------------------------------------------------------------------------------------------------------------------------------------------------------------------------------------------------------------------------------------------------------------------------------------------------------------------------------------------------------------------------------------------------------------------------------------------------------------------------------------------------------------------------------------|
| Journal:                      | <i>BMJ Open</i>                                                                                                                                                                                                                                                                                                                                                                                                                                                                                                                                                                                                                                                                                                                             |
| Manuscript ID                 | bmjopen-2020-048312                                                                                                                                                                                                                                                                                                                                                                                                                                                                                                                                                                                                                                                                                                                         |
| Article Type:                 | Original research                                                                                                                                                                                                                                                                                                                                                                                                                                                                                                                                                                                                                                                                                                                           |
| Date Submitted by the Author: | 22-Dec-2020                                                                                                                                                                                                                                                                                                                                                                                                                                                                                                                                                                                                                                                                                                                                 |
| Complete List of Authors:     | Mark, Peter; Copenhagen University Hospital, Clinical Biochemistry<br>Frydland, Martin; Copenhagen University Hospital, Cardiology<br>Helgestad, Ole ; Odense Universitetshospital, Cardiology<br>Holmvang, Lene; Copenhagen University Hospital, Rigshospitalet, Cardiology<br>Møller, Jacob; Odense Universitetshospital, Department of cardiology<br>Johansson, Pär I; Copenhagen University Hospital, Clinical Immunology<br>Ostrowski, Sisse; Copenhagen University Hospital, Clinical Immunology<br>Prickett, Timothy; Otago University Canterbury Medical Library, Cardiology<br>Hassager, Christian; The University Hospital of Copenhagen, Cardiology<br>Goetze, Jens Peter; Copenhagen University Hospital, Clinical Biochemistry |
| Keywords:                     | Myocardial infarction < CARDIOLOGY, Cardiology < INTERNAL MEDICINE, Adult cardiology < CARDIOLOGY                                                                                                                                                                                                                                                                                                                                                                                                                                                                                                                                                                                                                                           |
|                               |                                                                                                                                                                                                                                                                                                                                                                                                                                                                                                                                                                                                                                                                                                                                             |

SCHOLARONE™  
Manuscripts

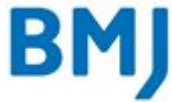

I, the Submitting Author has the right to grant and does grant on behalf of all authors of the Work (as defined in the below author licence), an exclusive licence and/or a non-exclusive licence for contributions from authors who are: i) UK Crown employees; ii) where BMJ has agreed a CC-BY licence shall apply, and/or iii) in accordance with the terms applicable for US Federal Government officers or employees acting as part of their official duties; on a worldwide, perpetual, irrevocable, royalty-free basis to BMJ Publishing Group Ltd ("BMJ") its licensees and where the relevant Journal is co-owned by BMJ to the co-owners of the Journal, to publish the Work in this journal and any other BMJ products and to exploit all rights, as set out in our [licence](#).

The Submitting Author accepts and understands that any supply made under these terms is made by BMJ to the Submitting Author unless you are acting as an employee on behalf of your employer or a postgraduate student of an affiliated institution which is paying any applicable article publishing charge ("APC") for Open Access articles. Where the Submitting Author wishes to make the Work available on an Open Access basis (and intends to pay the relevant APC), the terms of reuse of such Open Access shall be governed by a Creative Commons licence – details of these licences and which [Creative Commons](#) licence will apply to this Work are set out in our licence referred to above.

Other than as permitted in any relevant BMJ Author's Self Archiving Policies, I confirm this Work has not been accepted for publication elsewhere, is not being considered for publication elsewhere and does not duplicate material already published. I confirm all authors consent to publication of this Work and authorise the granting of this licence.

1  
2  
3 1 **Sex-specific Mortality Prediction by Pro-C-type Natriuretic Peptide Measurement**  
4  
5  
6 2 **in ST-elevation Myocardial Infarction**  
7

8  
9 3 Peter D. Mark, MD<sup>1</sup>; Martin Frydland, MD<sup>2</sup>; Ole K. L. Helgestad, MD<sup>3</sup>; Lene Holmvang,  
10  
11 4 MD, DMSc<sup>3</sup>; Jacob E. Møller, MD, DMSc<sup>3</sup>; Pär I. Johansson, MD, DMSc<sup>4</sup>; Sisse R.  
12  
13 5 Ostrowski, MD, DMSc<sup>4</sup>; Timothy C. R. Prickett, PhD<sup>5</sup>; Christian Hassager, MD, DMSc<sup>2</sup>;  
14  
15 6 Jens P. Goetze, MD, DMSc<sup>1,6</sup>  
16  
17

18  
19 7 <sup>1</sup>Department of Clinical Biochemistry, Copenhagen University Hospital, Rigshospitalet,  
20  
21 8 Copenhagen, Denmark

22  
23 9 <sup>2</sup>Department of Cardiology, Copenhagen University Hospital, Rigshospitalet,  
24  
25 10 Copenhagen, Denmark

26  
27 11 <sup>3</sup>Department of Cardiology, Odense University Hospital, Odense, Denmark

28  
29 12 <sup>4</sup>Department of Clinical Immunology, Copenhagen University Hospital, Rigshospitalet,  
30  
31 13 Copenhagen, Denmark

32  
33 14 <sup>5</sup>Department of Medicine, University of Otago, Christchurch, New Zealand

34  
35 15 <sup>6</sup>Department of Biomedical Sciences, Faculty of Health Sciences, Copenhagen  
36  
37 16 University, Copenhagen, Denmark  
38

39 18 **Word count (Introduction to conclusion):** 3086

40  
41 19 **Correspondence:** Jens P. Goetze, MD, DMSc

42  
43 20 Professor, Chief Physician

44  
45 21 Department of Clinical Biochemistry KB3013

46  
47 22 9 Blegdamsvej, DK-2100 Copenhagen, Denmark

48  
49 23 Phone: +45-3545-2202, Fax: +45-3545-2880, E-mail: JPG@dadlnet.dk

50  
51  
52 24 **Keywords:** Natriuretic peptides, C-type natriuretic peptide, CNP, ANP, Reference  
53  
54 25 intervals, Myocardial infarction.  
55  
56  
57  
58  
59  
60

1  
2  
3 1 **List of abbreviations:** CNP, C-type natriuretic peptide; ACS, acute coronary syndrome;  
4  
5 2 NT-proCNP, amino-terminal proCNP; STEMI, ST-elevation myocardial infarction;  
6  
7 3 proCNP (see Nomenclature); NOBIDA, Nordic Reference Interval Project Biobank and  
8  
9 4 Database; RH, Copenhagen University Hospital, Rigshospitalet; OUH, Odense  
10  
11 5 University Hospital; CAG, coronary angiography; ECG, electrocardiogram; BMI, body  
12  
13 6 mass index; LVEF, left ventricular ejection fraction; hs-CRP, high sensitivity c-reactive  
14  
15 7 protein; sTM, soluble thrombomodulin.  
16  
17  
18  
19  
20  
21  
22  
23  
24  
25  
26  
27  
28  
29  
30  
31  
32  
33  
34  
35  
36  
37  
38  
39  
40  
41  
42  
43  
44  
45  
46  
47  
48  
49  
50  
51  
52  
53  
54  
55  
56  
57  
58  
59  
60

## 1 **Abstract**

2 **Objective:** To determine the predictive value of pro-C-type natriuretic peptide (proCNP)  
3 measurement in plasma sampled on admission from patients presenting with ST-  
4 elevation myocardial infarction (STEMI).

5 **Design:** Prospective cohort study.

6 **Setting:** Two University Hospitals in Denmark.

7 **Participants:** 1760 consecutive patients (470 females and 1290 males) with confirmed  
8 STEMI.

9 **Main Outcomes and Measures:** The main outcome was all-cause mortality at 30 days  
10 and one year after presentation and the primary measure was proCNP concentration in  
11 plasma at admission in all patients and longitudinal measurements in a consecutive  
12 subgroup of 287 patients. A reference population (n = 688) defined cut-off values of  
13 increased proCNP concentrations.

14 **Results:** In all patients, an increased proCNP concentration was associated with a  
15 higher all-cause mortality after one year (HR: 1.6 (1.1-2.4),  $P_{\text{logrank}} = .009$ ) including an  
16 interaction of sex ( $P = .03$ ). In separate sex-stratified analyses, female patients showed  
17 increased all-cause mortality (HR<sub>one year</sub>: 2.6 (1.5-4.6),  $P_{\text{logrank}} < .001$ ), whereas no  
18 differences were found in male patients (HR<sub>one year</sub>: 1.1 (.7-1.9),  $P_{\text{logrank}} = .66$ ). After  
19 adjusting for potential risk factors, we found increased proCNP concentrations  $\geq$  the  
20 median value to be independently associated with increased risk of mortality in female  
21 patients within one year (HR per 1 pmol/L increase: 1.04 (1.01-1.06),  $P = .007$ ).

1  
2  
3 1 Moreover, we found indications of sex differences in proCNP concentrations over time  
4  
5 2 (higher proCNP in males (4.4 (-.28 – 9.1) pmol/L, P= .07) and interaction of sex and  
6  
7 3 time (P= .13)), and that hypertension was independently associated with higher proCNP  
8  
9 4 (4.5 (.6-8.4) pmol/L, P= .03).

10  
11  
12  
13 5 **Conclusions:** In female but not male patients presenting with STEMI, increased  
14  
15 6 concentrations of proCNP at admission independently indicate a higher risk of all-cause  
16  
17 7 mortality. The findings are remarkably specific for female patients, suggesting a different  
18  
19 8 vascular phenotype beyond traditional measures of coronary artery flow compared to  
20  
21 9 male patients.  
22  
23  
24  
25  
26  
27  
28  
29  
30  
31  
32  
33  
34  
35  
36  
37  
38  
39  
40  
41  
42  
43  
44  
45  
46  
47  
48  
49  
50  
51  
52  
53  
54  
55  
56  
57  
58  
59  
60

## 1 Strengths and limitations of this study

- 2 • This is the first study to investigate the prognostic potential of measurement of  
3 peptides derived from pro-C-type natriuretic peptide (proCNP) using predefined  
4 sex- and age-specific cut-off values based on a reference population.
- 5 • As a novel approach, a large cohort of patients are examined during the acute  
6 phase of ST-elevation myocardial infarction with plasma sampling at admission  
7 and all-cause mortality within one year as main outcome.
- 8 • To clarify the temporal pattern of proCNP concentrations, longitudinal  
9 measurements during admission in a subgroup of the cohort are used to further  
10 examine sex differences and baseline associations.
- 11 • The sex-specific analyses are exploratory and the present report should be  
12 considered a hypothesis-generating study.
- 13 • As all-cause mortality within one year is the only available outcome measure,  
14 other clinical end-points and long-term follow-up is not investigated.



## 1 Introduction

2 C-type natriuretic peptide (CNP) is a paracrine/autocrine peptide expressed in many  
3 tissues,[1] including endothelial cells.[2] Experimental studies have shown that  
4 endothelial-derived CNP is locally involved in regulation of vascular tone[3,4] and  
5 angiogenesis.[5] Also, a recent preclinical investigation has suggested that CNP plays a  
6 key protective role in cardiac pathophysiology.[6]

7 Clinical reports on the general population as well as patients with heart disease have  
8 examined circulating proCNP-derived peptides as prognostic markers.[7–9] In patients  
9 presenting with acute coronary syndrome (ACS), high concentrations of amino-terminal  
10 proCNP (NT-proCNP) in plasma measured 4-6 weeks after the event were reported to  
11 be the only natriuretic peptide to independently predict cardiac readmission and death in  
12 the patients with unstable angina.[7] Taken together, experimental and epidemiological  
13 data suggest CNP to be an important regulator of cardiovascular function and that  
14 increased concentrations of proCNP-derived peptides in plasma of patients reflect an  
15 unfavorable cardiovascular condition. However, no large study has explored the  
16 prognostic value of proCNP measurement in the acute phase of an ST-elevation  
17 myocardial infarction (STEMI).[10]

18 In this study, we measured the precursor of C-type natriuretic peptides (proCNP) in  
19 plasma from a large cohort of patients presenting with STEMI. We have previously  
20 reported on this method for accurate quantification of “total” proCNP in plasma by a  
21 processing-independent radioimmunoassay.[11] In total, 1760 patients with STEMI were  
22 included, and proCNP was measured in plasma sampled at admission to determine its

1 predictive value in 30-day and one-year all-cause mortality. Moreover, we investigated a  
2 subgroup of 287 patients with STEMI with longitudinal plasma samples collected during  
3 the hospital admission to examine proCNP concentrations over time and further analyze  
4 baseline associations between proCNP concentrations and vascular diseases. Finally,  
5 we included a large sample of healthy individuals (n = 688) in order to, independently of  
6 the patient cohort, establish age- and sex-specific reference intervals for proCNP  
7 concentrations in plasma.

## 8 *Nomenclature*

9 ProCNP: In the present article, proCNP refers to a specific amino-acid sequence  
10 (human proCNP 11-27) within the prohormone sequence of CNP; the epitope of the  
11 antiserum of our radioimmunoassay. In this processing-independent methodology, we  
12 utilize this fragment after enzymatic cleavage in vitro as a proxy measure of all proforms  
13 released to plasma irrespective of prohormone post-translational processing.

14 ProCNP-derived peptides: Collective term for any fragment of the prohormone of CNP.

## 15 **Methods**

### 16 REFERENCE POPULATION

17 For establishment of reference intervals, we used plasma samples from the Nordic  
18 Reference Interval Project Biobank and Database (NOBIDA), originally consisting of  
19 3002 subjects.[12] A subgroup of 853 subjects from this population was randomly  
20 selected with the aim to represent sex, age, and country of origin equally, as previously  
21 described.[13]

## 1 COHORT OF PATIENTS WITH STEMI

2 Patients with suspected STEMI were consecutively included from two Danish hospitals  
3 over a period of one year (2015/2016) (Copenhagen University Hospital, Rigshospitalet  
4 (RH), and Odense University Hospital (OUH)). The procedure of inclusion has been  
5 described previously.[14] From this cohort of patients with suspected STEMI and triaged  
6 for acute coronary angiography (CAG) (based on assessment of symptoms and the  
7 individual electrocardiogram (ECG)), we only included patients with confirmed  
8 STEMI.[15] All patients underwent CAG (See further details on data collection in the  
9 Supplemental Material).

## 10 PATIENT AND PUBLIC INVOLVEMENT

11 Patients and/or the public were not involved in the design, or conduct, or reporting, or  
12 dissemination plans of this research.

## 13 ETHICS

14 Patients gave written informed consent. When patients were not able to provide this  
15 (e.g. comatose cardiac arrest patients), consent was obtained by the patients' next of  
16 kin and general practitioners in accordance with national legislation. The study was  
17 approved by the local ethics committee (Copenhagen) (Ref. H-2-2014-110).

## 18 BIOCHEMICAL ANALYSES

19 Plasma proANP and proCNP concentrations were quantified by the previously reported  
20 processing-independent assay technology and procedures.[11,16,17] Information of  
21 other biochemical analyses can be found in the Supplemental Material.

## 1 ALL-CAUSE MORTALITY

2 The Danish Civil Registration System was used for all-cause mortality assessment. All  
3 Danish citizens are recorded with a unique 10-digit civil registration number, and deaths  
4 are registered within 2 weeks. Initial follow-up began on the date of admission and  
5 continued until date of death, or October 30<sup>th</sup>, 2017.

## 6 STATISTICS

### 7 *Reference Population*

8 We divided the reference population into groups based on sex and age (<50 and ≥50  
9 years) and used the RefVal software[18] to calculate 95% reference intervals based on  
10 a non-parametric bootstrapping method.

### 11 *STEMI Cohort*

12 Based on their respective sex- and age-specific reference interval from the reference  
13 population, all STEMI patients were stratified according to a) increased proCNP  
14 concentration (higher than the 95% reference interval), b) normal proCNP concentration  
15 (within the 95% reference interval), and c) decreased proCNP concentration (lower than  
16 the 95% reference interval). Dichotomous variables are presented as numbers (n) and  
17 percentages (%). Continuous variables are presented as medians with 25<sup>th</sup>–75<sup>th</sup>  
18 percentiles. Comparisons between groups were done using independent non-  
19 parametric t-tests and Fisher's exact two-sided test. Spearman's correlation analyses  
20 were used to assess the relationships between proCNP and other biochemical analytes.  
21 Differences in median proCNP concentrations at different time intervals from onset of

1 symptoms to blood sample were assessed by Kruskal-Wallis tests (this time parameter  
2 also reflects total ischemic time; see Supplemental Material). All-cause mortality after 30  
3 days and one year was assessed in patients stratified into normal or increased proCNP  
4 concentrations and depicted by Kaplan-Meier plots and then compared with the log-rank  
5 test and estimates of hazard ratio including 95% confidence intervals. We performed a  
6 statistic test of interaction between sex and groups of proCNP. To test the relation of  
7 mortality and proCNP concentrations on a continuous scale, we performed cubic spline  
8 plots with the density distribution and the logarithm of hazard ratios. We focused our  
9 further mortality analyses on proCNP concentrations  $\geq$  median, where we observed an  
10 effect of increasing proCNP concentrations on mortality. Patients were divided into  
11 groups of  $\geq$  vs.  $<$  median proCNP according to sex- and age-specific median proCNP  
12 concentrations in the reference population. Multivariable Cox proportional hazard  
13 models including proCNP, age, plasma creatinine, plasma proANP, time from onset of  
14 symptoms to blood sample, number of coronary vessels affected and tertiles of peak  
15 plasma troponin concentrations were constructed for mortality assessment. Both  
16 plasma proANP and creatinine were logarithmically transformed, where peak troponin T  
17 and troponin I were combined in one variable of tertiles (represented by values of one to  
18 three) as a proxy myocardial infarction size, before being entered into the model. For  
19 longitudinal analyses, we constructed four time points/intervals for statistical analyses  
20 (1: samples from admission; 2: 1 to 12 hours after admission; 3:  $>12$  to 24 hours after  
21 admission; 4:  $>24$  hours after admission). We used linear mixed models of unstructured  
22 co-variances to examine changes in concentrations and associations with co-variables  
23 over time. Statistical analyses were performed using RefVal software<sup>20</sup> for calculation of

1  
2  
3 1 reference intervals, statistical software R version 3.6.1 (R Core Team, Vienna,  
4  
5 2 Austria[19]) for linear mixed models (nlme package), and IBM SPSS Statistics 22  
6  
7 3 (SPSS Inc., Chicago, Illinois, United States) for other analyses. A *P*-value <.05 was  
8  
9 4 considered statistically significant.

## 13 **Results**

16 6 In the NOBIDA reference population, we measured proCNP concentrations in available  
17  
18 7 plasma from 688 subjects (358 females; 330 males). From these measurements, 95%  
19  
20 8 reference intervals for females vs. males and < vs. ≥ 50 years were calculated (see  
21  
22 9 results in the Supplemental Material).

26 10 From the cohort of 2247 patients with suspected STEMI, 1760 patients (460  
27  
28 11 females and 1290 males) with verified STEMI and available plasma were included in  
29  
30 12 our study (see Supplemental Material for histograms of the distribution of plasma  
31  
32 13 proCNP concentrations in the reference population). When compared to the sex- and  
33  
34 14 age-specific reference intervals, a total of 283 (16.1%) of the patients had an increased  
35  
36 15 proCNP concentration; no difference in sex-specific proportions was observed (*P* = .42).

41 16 Table 1 shows the baseline characteristics and follow-up in patient groups  
42  
43 17 defined by normal or increased proCNP concentrations. Five patients (one male and  
44  
45 18 four females) displayed decreased proCNP concentrations and were not included in  
46  
47 19 Table 1. Missing individual information on each variable in each group was between  
48  
49 20 .1% and 4.4%, except for age, sex, mortality, cardiogenic shock, cardiac arrest coma,  
50  
51 21 time from onset of symptoms to blood sample, and TIMI grade flow, where information  
52  
53 22 from all patients was available. Female patients with increased proCNP concentrations  
54  
55  
56  
57  
58  
59  
60

1 at admission had a higher prevalence of hypertension ( $P = .003$ ), diabetes mellitus ( $P =$   
2  $.022$ ), peripheral artery disease ( $P = .002$ ), and kidney disease ( $P < .001$ ), whereas  
3 male patients had higher prevalence of hypertension ( $P = .004$ ), stroke ( $P = .012$ ), and  
4 kidney disease ( $P < .001$ ). Increased proCNP was associated with higher  
5 concentrations of proANP ( $P = .019$ ) and soluble thrombomodulin (sTM) ( $P = .001$ ) in  
6 female patients and with higher concentrations of creatinine ( $P < .001$ ), syndecan-1 ( $P =$   
7  $.019$ ), and sTM ( $P = .003$ ) in male patients. Lastly, we found a higher one-year mortality  
8 rate ( $P = .001$ ) and prevalence of cardiogenic shock development ( $P = .013$ ) in female  
9 patients with increased proCNP concentrations, whereas no differences were found in  
10 male patients. For biochemical markers with positive associations to proCNP, we  
11 performed Spearman's correlation analyses (see the Supplemental Material for results).

12 Thirty-days and one-year all-cause mortality plots of normal and increased  
13 proCNP concentrations of all patients and stratified by sex are depicted in Figure 1.  
14 Different mortality rates were found for all patients at both time points ( $HR_{30 \text{ days}} = 1.6$   
15  $(1.0-2.6)$ ,  $P_{logrank} = .03$  and  $HR_{one-year} = 1.6 (1.1-2.4)$ ,  $P_{logrank} = .009$ ). However, we found  
16 an interaction of sex and groups of proCNP ( $P = .03$ ). In sex-specific estimates, only  
17 female patients showed different mortality rates (females<sub>30 days</sub>:  $HR = 2.8 (1.4-5.6)$ ,  
18  $P_{logrank} = .002$ , females<sub>one-year</sub>:  $HR = 2.6 (1.5-4.6)$ ,  $P_{logrank} < .001$ , males<sub>30 days</sub>:  $HR = 1.1$   
19  $(0.6-2.1)$ ,  $P_{logrank} = .87$ , and males<sub>one-year</sub>:  $HR = 1.1 (.7-1.9)$ ,  $P_{logrank} = .66$ ). In cubic spline  
20 plots, we observed an effect of increasing proCNP as a continuous variable on mortality  
21 from median concentrations in both sexes. We therefore focused on this upper range of  
22 proCNP concentrations in Cox regression analyses (see Supplemental Figure 3). In a  
23 univariate Cox proportional hazard model, we found an elevated hazard ratio (HR) of

1 all-cause mortality with increases of plasma proCNP for both sexes (results shown in  
2 Table 2). When including age and plasma creatinine in a multivariable model (Model 1),  
3 proCNP was independently associated with mortality in female but not in male patients  
4 (see Table 2): HR (95% CI) for female patients was 1.04 (1.01-1.07) ( $P = .008$ ) for 30-  
5 day and 1.03 (1.01-1.06) ( $P = .010$ ) for one-year mortality, whereas HR was 1.00 for  
6 both all patients and male patients at both time points (see Table 2). In a model where  
7 proANP, tertiles of peak troponins, number of vessels affected, and time from onset of  
8 symptoms to admission were also added (Model 2), risk estimates of proCNP (per one  
9 pmol/L increase) were: HR (95% CI) = 1.04 (1.01-1.07),  $P = .016$  for 30-day mortality,  
10 and HR (95% CI) = 1.04 (1.01-1.06),  $P = .007$  for one-year mortality.

11 To examine proCNP concentrations over time during a STEMI and further test  
12 the baseline associations of vascular disease and increased proCNP, we used a set of  
13 longitudinal plasma samples from a consecutive subgroup of the cohort consisting of  
14 287 STEMI patients (64 females and 223 males). Results are shown in Figure 2 and  
15 Table 3. An overall decrease in proCNP concentration was estimated to be 3.8 pmol/L  
16 (~10%) ( $P = .001$ ) from admission to >24 hours. In a multivariate model including sex,  
17 age, and chronic diseases (Model 3), kidney disease and hypertension were  
18 independently associated with higher concentrations of proCNP ( $P < .001$  and  $P = .03$ ,  
19 respectively), whereas time and age were not independently associated with changes in  
20 proCNP. Also, both Model 2 and 3 implied a positive association of proCNP  
21 concentration and male sex, and an interaction of time and sex; however, the statistical  
22 uncertainty of these estimates was substantial ( $P = .07$  and  $P = .13$ , respectively).  
23 Figure 2 shows proCNP concentrations over time in overall and sex-specific graphs



1  
2  
3 1 including graphs of kidney disease and hypertension (see the Supplemental Material for  
4  
5 2 further results of longitudinal measurements).  
6  
7

### 8 3 **Discussion**

9  
10  
11 4 In this study, we report on a marked sex-specific prognostic information profile for  
12  
13 5 proCNP measurement in patients presenting with a STEMI. A major advantage of our  
14  
15 6 present approach comes from an independent establishment of a sex-specific proCNP  
16  
17 7 reference interval prior to patient measurement. This allowed us to perform clinically  
18  
19 8 meaningful divisions of normal, decreased, or increased proCNP concentrations in  
20  
21 9 plasma specific to sex, rather than testing differences only within the patient cohort as a  
22  
23 10 whole (see the Supplemental Material for discussion of age groups).  
24  
25  
26  
27

28  
29 11 In this cohort of consecutive patients with a verified STEMI, we show that 16.1%  
30  
31 12 have increased concentrations of proCNP during the early phase of the myocardial  
32  
33 13 infarction compared with the sex- and age-specific intervals. Interestingly, besides  
34  
35 14 higher prevalence of kidney disease, we found a markedly higher prevalence of  
36  
37 15 cardiovascular disease including hypertension in both sexes; diabetes mellitus and  
38  
39 16 peripheral artery disease for female patients; and stroke for males among patients with  
40  
41 17 increased proCNP. Our longitudinal analyses of a subgroup of the STEMI patients  
42  
43 18 corroborates that the association to both kidney disease and hypertension is consistent  
44  
45 19 even over time and is independent of sex, age, and other cardiovascular diseases. A  
46  
47 20 putative explanation for the linkage of hypertension and increased proCNP  
48  
49 21 concentrations is the upregulation of CNP expression by vascular shear stress.[20,21]  
50  
51  
52 22 The positive association of proCNP and a vascular marker, sTM, for both sexes also  
53  
54  
55  
56  
57  
58  
59  
60

1 support the relation of circulating proCNP with vascular stress. In contrast, the baseline  
2 associations of increased proCNP concentrations and diabetes, peripheral artery  
3 disease and stroke, respectively, are not statistically independent in longitudinal  
4 analyses. However, given the sex-specific pattern in the baseline findings and the  
5 limited number of patients with the respective diseases in longitudinal analyses, the  
6 results may be too preliminary to sufficiently conclude on the potential associations to  
7 diabetes, peripheral artery disease, and stroke. Also, the statistical uncertainty of the  
8 suggested effect of sex and interaction of sex and time in longitudinal analyses calls for  
9 a cautious interpretation (see the Supplemental Material for further discussion of  
10 longitudinal analyses).

11         The risks of death within 30 days and one year were higher for female patients  
12 with increased proCNP concentrations – but not for male patients. This marked sex-  
13 specific association was confirmed when the mortality rate was analyzed by increases  
14 of proCNP  $\geq$  median, where proCNP proved to be an independent predictor in a model  
15 (Model 1 in Table 2) including two additional variables, age and plasma creatinine,  
16 which have previously established associations with NT-proCNP in plasma.[22] To  
17 further test the prognostic potential of proCNP, we added plasma proANP, tertiles of  
18 peak troponins, number of vessels affected, and time from onset of symptoms to  
19 admission into a multivariable model (Model 2). In this model, increases of proCNP  
20 were still independently associated with the risk of death, and the estimates were of  
21 similar size at both time points. Recent data on patients with STEMI found no  
22 independent prognostic value on mortality rate for NT-proCNP concentrations.[7]  
23 However, that report differed from ours in several aspects including radioimmunoassay

1 principle and duration of follow-up, and, importantly, plasma was sampled 4-6 weeks  
2 after admission in contrast to our real-time STEMI investigation. These differences  
3 make a direct comparison difficult.

4 Our results firmly suggest a sex-specific association with survival, where  
5 increased proCNP concentrations indicate a poorer prognosis in female patients.  
6 Previously, studies have shown that CNP acts as a more potent vasodilator in female  
7 porcine arteries[23] and that the female sex hormone estradiol upregulates the  
8 expression of CNP in vascular endothelial cells.[24] Furthermore, recent preclinical  
9 reports have convincingly pointed to a pivotal role of CNP and its receptors in the  
10 regulation of the microcirculation[4] and in cardiac homeostasis.[25] Taken together,  
11 these previous findings suggest that the CNP system is a critical modulator of vascular  
12 integrity and function including a more pronounced vasodilatory capacity in females that  
13 may be provided by female sex hormones. Clinical evidence shows that females display  
14 a sharp rise in the incidence of cardiovascular disease after menopause and that  
15 changes in sex hormones by complex mechanisms play a key role in the loss of  
16 vasoprotection.[26,27] Notably, postmenopausal females are at higher risk of coronary  
17 microvascular dysfunction and HFpEF compared with their male counterparts,[28] and  
18 high concentrations of NT-proCNP have previously been independently linked to an  
19 adverse outcome in patients with HFpEF.[8] In this perspective, we speculate that our  
20 observed sex-specific effect of increased proCNP concentrations in plasma of patients  
21 with STEMI partly reflects ongoing vascular dysfunction in females in particular and,  
22 hence, represents an independent signal of poor cardiovascular prognosis. However,

1  
2  
3 1 there is a need for translational research to elucidate this association between  
4  
5 2 increased proCNP in females with vascular complications and increased mortality rate.  
6  
7

### 8 3 *Limitations*

9

10  
11 4 While the number of patients with STEMI in the cohort is high, the follow-up period is  
12  
13 5 relatively short. We examined only all-cause mortality as outcome in our follow-up  
14  
15 6 multivariable Cox regression analyses, and other clinical endpoints, e.g., cardiac  
16  
17 7 readmission, were not tested. Hence, the number of events limits the number of  
18  
19 8 possible covariates in the multivariable Cox regression analyses (Model 3), and sex-  
20  
21 9 specific estimates of 30-day mortality in this model should be interpreted cautiously.  
22  
23 10 Moreover, this study focused on increased proCNP and the upper range of proCNP  
24  
25 11 concentrations in plasma, whereas associations of decreased proCNP concentrations  
26  
27 12 were not investigated. With regard to measurement of troponins in plasma, two different  
28  
29 13 analytes (TnT and TnI) were measured at the two hospitals of inclusion. Thus, a  
30  
31 14 combined variable of tertiles of peak troponins (discrete values of one to three) was  
32  
33 15 included in the multivariable models with less quantitative information than the  
34  
35 16 measured concentrations. Baseline biochemical analyses were performed on arterial  
36  
37 17 plasma, whereas venous plasma was used from the reference population and in  
38  
39 18 repeated measurements. A previous report has shown slightly lower plasma  
40  
41 19 concentrations of NT-proCNP in arterial compared with venous plasma.[29] Thus, in  
42  
43 20 theory, our approach will underestimate the proportion of STEMI patients with increased  
44  
45 21 proCNP concentration and the initial longitudinal decrease in proCNP concentration  
46  
47 22 from baseline to the second time point (0 to 1-12 hours).  
48  
49  
50  
51  
52  
53  
54  
55  
56  
57  
58  
59  
60

## 1 **Conclusions**

2 We show here that increased proCNP concentrations in plasma from patients  
3 presenting with STEMI are associated with a higher all-cause mortality rate within one  
4 year among female patients with STEMI, whereas male patients display no such  
5 pattern. Moreover, we report that an increase of proCNP in the upper range of plasma  
6 concentrations in female patients is an independent prognostic marker of mortality at  
7 both 30 days and one year. The findings are remarkably specific for female patients,  
8 suggesting a different vascular phenotype beyond traditional measures of coronary  
9 artery flow compared to male patients.

## 1 **Acknowledgements**

2 We are grateful to laboratory technicians Marie Ziebell Severinsen and Anne Truesen  
3 Asanovski for their expertise regarding proANP and proCNP measurement in plasma.

## 4 **Contributors**

5 Designed the study: PDM, MF, CH, JPG. Designed and conducted the STEMI cohort  
6 study: MF, OKLH, LH, JEM, CH. Undertook biochemical measurements: PDM, SRO,  
7 PIJ, JPG. Performed the data analysis: PDM, MF, TCRP. Wrote the manuscript draft:  
8 PDM. Revised the paper based on intellectual contribution: PDM, MF, OKLH, LH, JEM,  
9 PIJ, SRO, TCRP, CH, JPG.

## 10 **Funding**

11 Research grants from Rigshospitalet.

## 12 **Competing interests**

13 None to report.

## 14 **Patient and public involvement**

15 Patients and/or the public were not involved in the design, or conduct, or reporting, or  
16 dissemination plans of this research.

## 17 **Ethics approval**

18 The study was approved by the local ethics committee (Copenhagen) (Ref. H-2-2014-  
19 110).

1  
2  
3  
4  
5  
6  
7  
8  
9  
10  
11  
12  
13  
14  
15  
16  
17  
18  
19  
20  
21  
22  
23  
24  
25  
26  
27  
28  
29  
30  
31  
32  
33  
34  
35  
36  
37  
38  
39  
40  
41  
42  
43  
44  
45  
46  
47  
48  
49  
50  
51  
52  
53  
54  
55  
56  
57  
58  
59  
60

1 **Data availability statement**

2 Data are available upon reasonable request (email: JPG@dadlnet.dk).

For peer review only

## 1 References

- 2 1 Sellitti DF, Koles N, Mendona MC. Regulation of C-type natriuretic peptide  
3 expression. *Peptides*. 2011;**32**:1964–71. doi:10.1016/j.peptides.2011.07.013
- 4 2 Stingo AJ, Clavell AL, Heublein DM, *et al*. Presence of C-type natriuretic peptide  
5 in cultured human endothelial cells and plasma. *Am J Physiol - Hear Circ Physiol*  
6 1992;**263**:H1318-21. doi:10.1152/ajpheart.1992.263.4.h1318
- 7 3 Nakao K, Kuwahara K, Nishikimi T, *et al*. Endothelium-Derived C-Type Natriuretic  
8 Peptide Contributes to Blood Pressure Regulation by Maintaining Endothelial  
9 Integrity. *Hypertension* 2017;**69**:286–96.  
10 doi:10.1161/HYPERTENSIONAHA.116.08219
- 11 4 Špiranec K, Chen W, Werner F, *et al*. Endothelial C-type natriuretic peptide acts  
12 on pericytes to regulate microcirculatory flow and blood pressure. *Circulation*  
13 2018;**138**:494–508. doi:10.1161/CIRCULATIONAHA.117.033383
- 14 5 Bubb KJ, Aubdool AA, Moyes AJ, *et al*. Endothelial C-Type Natriuretic Peptide Is  
15 a Critical Regulator of Angiogenesis and Vascular Remodeling. *Circulation*  
16 2019;**139**:1612–28. doi:10.1161/CIRCULATIONAHA.118.036344
- 17 6 Parmar KM, Larman HB, Dai G, *et al*. Integration of flow-dependent endothelial  
18 phenotypes by Kruppel-like factor 2. *J Clin Invest* 2006;**116**:49–58.  
19 doi:10.1172/JCI24787
- 20 7 Prickett TCR, Doughty RN, Troughton RW, *et al*. C-type natriuretic peptides in  
21 coronary disease. *Clin Chem* 2017;**63**:316–24.



- 1  
2  
3 1 doi:10.1373/clinchem.2016.257816  
4  
5  
6 2 8 Lok DJ, Klip IJT, Voors AA, *et al.* Prognostic value of N-terminal pro C-type  
7  
8 natriuretic peptide in heart failure patients with preserved and reduced ejection  
9 3  
10 fraction. *Eur J Heart Fail* 2014;**16**:958–66. doi:10.1002/ejhf.140  
11 4  
12  
13  
14 5 9 Sangaralingham SJ, McKie PM, Ichiki T, *et al.* Circulating C-Type Natriuretic  
15  
16 Peptide and Its Relationship to Cardiovascular Disease in the General Population.  
17 6  
18 *Hypertension* 2015;**65**:1187–94. doi:10.1161/HYPERTENSIONAHA.115.05366  
19 7  
20  
21  
22 8 10 Pemberton CJ, Siriwardena M, Kleffmann T, *et al.* C-type natriuretic peptide  
23  
24 (CNP) signal peptide fragments are present in the human circulation. *Biochem*  
25  
26 *Biophys Res Commun* 2014;**449**:301–6. doi:10.1016/j.bbrc.2014.05.020  
27 10  
28  
29  
30 11 11 Lippert SK, Rehfeld JF, Goetze JP. Processing-independent analysis for pro-C-  
31  
32 type natriuretic peptide. *J Immunol Methods* 2010;**362**:32–7.  
33  
34 13 doi:10.1016/j.jim.2010.08.003  
35  
36  
37 14 12 Felding P, Rustad P, Mårtensson A, *et al.* Reference individuals, blood collection,  
38  
39 treatment of samples and descriptive data from the questionnaire in the Nordic  
40 15  
41 Reference Interval Project 2000. *Scand J Clin Lab Invest* 2004;**64**:327–42.  
42 16  
43  
44 17 doi:10.1080/00365510410006630  
45  
46  
47 18 13 Mark PD, Hunter I, Terzic D, *et al.* Processing-independent proANP measurement  
48  
49 for low concentrations in plasma: Reference intervals and effect of body mass  
50 19  
51 index and plasma glucose. *Clin Chem Lab Med* 2017;**56**:132–7.  
52 20  
53  
54 21 doi:10.1515/cclm-2017-0309  
55  
56  
57  
58  
59  
60

- 1  
2  
3 1 14 Obling L, Frydland M, Hansen R, *et al*. Risk factors of late cardiogenic shock and  
4 mortality in ST-segment elevation myocardial infarction patients. *Eur Hear journal*  
5  
6 2  
7  
8 3 *Acute Cardiovasc care* 2018;**7**:7–15. doi:10.1177/2048872617706503  
9  
10  
11 4 15 Thygesen K, Alpert JS, Jaffe AS, *et al*. Third universal definition of myocardial  
12 infarction. *Circulation* 2012;**126**:2020–35. doi:10.1161/CIR.0b013e31826e1058  
13  
14  
15  
16 6 16 Rehfeld J, Goetze J. The Posttranslational Phase of Gene Expression: New  
17 Possibilities in Molecular Diagnosis. *Curr Mol Med* 2005;**3**:25–38.  
18  
19 7  
20 doi:10.2174/1566524033361717  
21  
22  
23  
24 9 17 Hunter I, Rehfeld JF, Goetze JP. Measurement of the total proANP product in  
25 mammals by processing independent analysis. *J Immunol Methods*  
26  
27 10  
28 2011;**370**:104–10. doi:10.1016/j.jim.2011.06.005  
29  
30  
31  
32 12 18 Solberg HE. The IFCC recommendation on estimation of reference intervals. The  
33 RefVal program. *Clin Chem Lab Med* 2004;**42**:710–4.  
34  
35 13  
36 14 doi:10.1515/CCLM.2004.121  
37  
38  
39  
40 15 19 3.5.1. RDCT. A Language and Environment for Statistical Computing. *R Found*  
41 *Stat Comput* 2018;**2**:<https://www.R-project.org>.<http://www.r-project.org>  
42  
43  
44  
45 17 20 Chun TH, Itoh H, Ogawa Y, *et al*. Shear stress augments expression of C-type  
46 natriuretic peptide and adrenomedullin. *Hypertension* 1997;**29**:1296–302.  
47  
48 18  
49 19 doi:10.1161/01.HYP.29.6.1296  
50  
51  
52  
53 20 21 Zhang Z, Xiao Z, Diamond SL. Shear Stress Induction of C-type Natriuretic  
54 Peptide (CNP) in Endothelial Cells is Independent of NO Autocrine Signaling. *Ann*  
55  
56  
57  
58  
59  
60

- 1  
2  
3 1 *Biomed Eng* 1999;**27**:419–26. doi:10.1114/1.203  
4  
5  
6 2 22 Prickett TCR, Olney RC, Cameron VA, *et al.* Impact of age, phenotype and  
7  
8 cardio-renal function on plasma C-type and B-type natriuretic peptide forms in an  
9 3  
10 adult population. *Clin Endocrinol (Oxf)* 2013;**78**:783–9. doi:10.1111/cen.12035  
11 4  
12  
13  
14 5 23 Barber DA, Burnett JC, Fitzpatrick LA, *et al.* Gender and relaxation to C-type  
15  
16 natriuretic peptide in porcine coronary arteries. *J Cardiovasc Pharmacol*  
17 6  
18 1998;**32**:5–11. doi:10.1097/00005344-199807000-00002  
19 7  
20  
21  
22 8 24 Prickett TCR, Barrell GK, Wellby M, *et al.* Effect of sex steroids on plasma C-type  
23  
24 natriuretic peptide forms: Stimulation by oestradiol in lambs and adult sheep. *J*  
25 9  
26 *Endocrinol* 2008;**199**:481–7. doi:10.1677/JOE-08-0267  
27 10  
28  
29  
30 11 25 Moyes AJ, Chu SM, Aubdool AA, *et al.* C-type natriuretic peptide co-ordinates  
31  
32 cardiac structure and function. *Eur Heart J* 2020;**41**:1006–20.  
33  
34 12  
35 doi:10.1093/eurheartj/ehz093  
36  
37  
38 14 26 Vitale C, Mendelsohn ME, Rosano GMC. Gender differences in the  
39  
40 cardiovascular effect of sex hormones. *Nat Rev Cardiol* 2009;**6**:532–42.  
41  
42 15  
43 doi:10.1038/nrcardio.2009.105  
44  
45  
46 17 27 Mendelsohn ME, Karas RH. Molecular and cellular basis of cardiovascular gender  
47  
48 differences. *Science (80- )* 2005;**308**:1583–7. doi:10.1126/science.1112062  
49  
50  
51 19 28 Den Ruijter HM, Haitjema S, Asselbergs FW, *et al.* Sex matters to the heart: A  
52  
53 special issue dedicated to the impact of sex related differences of cardiovascular  
54  
55 20  
56 diseases. *Atherosclerosis* 2015;**241**:205–7.  
57  
58  
59  
60

1  
2  
3 1 doi:10.1016/j.atherosclerosis.2015.05.003  
4  
5

6 2 29 Palmer SC, Prickett TCR, Espiner EA, *et al.* Regional release and clearance of C-  
7  
8 type natriuretic peptides in the human circulation and relation to cardiac function.  
9 3  
10  
11 4 *Hypertension* 2009;**54**:612–8. doi:10.1161/HYPERTENSIONAHA.109.135608  
12  
13  
14  
15  
16  
17  
18  
19  
20  
21  
22  
23  
24  
25  
26  
27  
28  
29  
30  
31  
32  
33  
34  
35  
36  
37  
38  
39  
40  
41  
42  
43  
44  
45  
46  
47  
48  
49  
50  
51  
52  
53  
54  
55  
56  
57  
58  
59  
60

**Table 1. Sex-specific characteristics, medical history, and biochemical results in groups of proCNP concentrations in the STEMI-cohort.**

|                                                                | All patients (n = 1755) |                  |         | Females (n = 466) |                  |         | Males (n = 1289) |                  |         |
|----------------------------------------------------------------|-------------------------|------------------|---------|-------------------|------------------|---------|------------------|------------------|---------|
|                                                                | Normal proCNP           | Increased proCNP | P Value | Normal proCNP     | Increased proCNP | P Value | Normal proCNP    | Increased proCNP | P Value |
| <b>Number, n (%)</b>                                           | 1472 (83.6)             | 283 (16.1)       | -       | 385 (81.9)        | 81 (17.2)        | -       | 1087 (84.2)      | 202 (15.6)       | -       |
| <b>Age, years</b>                                              | 63 (54-72)              | 66 (56-76)       | .046    | 67 (56-77)        | 72 (60-80)       | .16     | 62 (53-70)       | 64 (55-74)       | .21     |
| <b>Males, n (%)</b>                                            | 1087 (73.8)             | 202 (71.4)       | .42     | -                 | -                | -       | -                | -                | -       |
| <b>Height, cm</b>                                              | -                       | -                | -       | 165 (160-169)     | 164 (160-168)    | .13     | 178 (173-182)    | 178 (174-183)    | .87     |
| <b>BMI, kg/m<sup>2</sup></b>                                   | 26.3 (24.1-29.3)        | 26.3 (23.8-30.1) | .96     | 25.4 (20.0-29.1)  | 25.7 (22.5-31.2) | .61     | 26.5 (24.5-29.3) | 26.5 (24.2-29.9) | .76     |
| <b>Smoking, n (%)</b>                                          | 1045 (73.3)             | 203 (74.9)       | .60     | 250 (68.1)        | 54 (70.1)        | .79     | 795 (75.1)       | 149 (76.8)       | .65     |
| <b>Time from symptom to blood sample, min</b>                  | 190 (128-376)           | 178 (125-292)    | .34     | 210 (136-460)     | 216 (141-349)    | >.99    | 185 (125-356)    | 167 (123-271)    | .18     |
| <b>LVEF, %</b>                                                 | 45 (40-55)              | 45 (35-55)       | .33     | 50 (40-55)        | 45 (35-55)       | .62     | 45 (40-55)       | 45 (36-55)       | .36     |
| <b>Culprit vessel</b>                                          |                         |                  |         |                   |                  |         |                  |                  |         |
| <b>None, n (%)</b>                                             | 55 (3.7)                | 7 (2.5)          | .38     | 21 (5.5)          | 5 (6.2)          | .79     | 34 (3.1)         | 2 (1.0)          | .10     |
| <b>Left main coronary artery, n (%)</b>                        | 31 (2.1)                | 5 (1.8)          | >.99    | 15 (3.9)          | 2 (2.5)          | .75     | 16 (1.5)         | 3 (1.5)          | >.99    |
| <b>Left anterior descending coronary artery, n (%)</b>         | 623 (42.3)              | 119 (42.0)       | .95     | 144 (37.4)        | 31 (38.3)        | .90     | 479 (44.1)       | 88 (43.6)        | .94     |
| <b>Right coronary artery, n (%)</b>                            | 529 (35.9)              | 115 (40.6)       | .14     | 148 (38.4)        | 34 (42.0)        | .62     | 381 (35.1)       | 81 (40.1)        | .18     |
| <b>Left circumflex, n (%)</b>                                  | 221 (15.0)              | 36 (12.7)        | .36     | 54 (14.0)         | 9 (11.1)         | .59     | 167 (15.4)       | 27 (13.4)        | .52     |
| <b>Graft, n (%)</b>                                            | 10 (0.7)                | 1 (0.4)          | >.99    | 1 (0.3)           | 0 (0)            | >.99    | 9 (0.8)          | 1 (0.5)          | >.99    |
| <b>Number of vessels affected</b>                              |                         |                  |         |                   |                  |         |                  |                  |         |
| <b>No-vessel disease, n (%)</b>                                | 29 (2.0)                | 2 (0.7)          | .21     | 14 (3.6)          | 2 (2.5)          | >.99    | 15 (1.4)         | 0 (0)            | .15     |
| <b>One-vessel disease, n (%)</b>                               | 903 (61.5)              | 172 (60.7)       | .84     | 243 (63.4)        | 46 (56.8)        | .31     | 660 (60.8)       | 126 (62.4)       | .70     |
| <b>Two-vessels disease, n (%)</b>                              | 333 (22.7)              | 61 (21.6)        | .76     | 75 (19.6)         | 20 (24.7)        | .29     | 258 (23.8)       | 41 (20.3)        | .32     |
| <b>Three-vessels disease, n (%)</b>                            | 204 (13.9)              | 48 (17.0)        | .20     | 51 (13.3)         | 13 (16.0)        | .48     | 153 (14.1)       | 35 (17.3)        | .23     |
| <b>Thrombolysis in Myocardial Infarction (TIMI) grade flow</b> |                         |                  |         |                   |                  |         |                  |                  |         |
| <b>0, n (%)</b>                                                | 96 (6.8)                | 21 (7.4)         | .60     | 28 (7.2)          | 8 (9.9)          | .49     | 68 (6.3)         | 13 (6.4)         | .88     |
| <b>1, n (%)</b>                                                | 6 (0.4)                 | 1 (0.4)          | >.99    | 1 (0.3)           | 0 (0)            | >.99    | 5 (0.5)          | 1 (0.5)          | >.99    |
| <b>2, n (%)</b>                                                | 49 (3.3)                | 7 (2.5)          | .58     | 17 (4.4)          | 2 (2.5)          | .55     | 32 (2.9)         | 5 (2.5)          | >.99    |
| <b>3, n (%)</b>                                                | 1321 (89.7)             | 254 (89.8)       | >.99    | 339 (88.1)        | 71 (87.7)        | .85     | 982 (90.3)       | 183 (90.6)       | >.99    |
| <b>Medical history, n (%)</b>                                  |                         |                  |         |                   |                  |         |                  |                  |         |

|                                                        |                    |                    |       |                    |                    |       |                    |                    |       |
|--------------------------------------------------------|--------------------|--------------------|-------|--------------------|--------------------|-------|--------------------|--------------------|-------|
| <b>Hypertension</b>                                    | 612 (42.6)         | 156 (56.1)         | <.001 | 177 (46.9)         | 52 (65.8)          | .003  | 435 (41.0)         | 104 (52.3)         | .004  |
| <b>Diabetes mellitus</b>                               | 177 (12.3)         | 51 (18.3)          | .009  | 47 (12.5)          | 18 (22.2)          | .022  | 130 (12.2)         | 33 (16.5)          | .11   |
| <b>Peripheral artery disease</b>                       | 72 (5.0)           | 24 (8.5)           | .023  | 15 (4.0)           | 11 (13.6)          | .002  | 57 (5.3)           | 13 (6.4)           | .50   |
| <b>Stroke</b>                                          | 91 (6.3)           | 30 (10.6)          | .015  | 30 (7.9)           | 8 (9.9)            | .51   | 61 (5.7)           | 22 (10.9)          | .012  |
| <b>Kidney disease</b>                                  | 41 (2.8)           | 40 (14.1)          | <.001 | 10 (2.6)           | 11 (13.6)          | <.001 | 31 (2.9)           | 29 (14.4)          | <.001 |
| <b>Ischemic heart disease</b>                          | 218 (14.8)         | 43 (16.3)          | .53   | 44 (11.5)          | 10 (12.3)          | .85   | 174 (16.0)         | 36 (17.9)          | .53   |
| <b>Heart failure</b>                                   | 38 (2.6)           | 13 (4.6)           | .079  | 6 (1.6)            | 3 (3.7)            | .19   | 32 (2.9)           | 10 (5.0)           | .13   |
| <b>Biochemical analyses</b>                            |                    |                    |       |                    |                    |       |                    |                    |       |
| <b>Acute Troponin I, ng/L</b>                          | 220 (53-1576)      | 323 (86-887)       | .52   | 293 (54-3220)      | 813 (176-1814)     | .57   | 188 (53-1481)      | 211 (58-844)       | .99   |
| <b>Acute Troponin T, ng/L</b>                          | 1610 (329-3940)    | 953 (222-3370)     | .018  | 1520 (394-3540)    | 571 (166-2753)     | .076  | 1640 (287-4058)    | 1250 (242-3710)    | .24   |
| <b>Peak Troponin I, ng/L</b>                           | 20264 (3413-50000) | 19981 (5508-50000) | .91   | 12970 (2734-41856) | 11721 (4014-50000) | .98   | 24507 (3654-50000) | 20575 (5771-47927) | .56   |
| <b>Peak Troponin T, ng/L</b>                           | 3110 (1230-6920)   | 2430 (880-8060)    | .23   | 2520 (995-5930)    | 2290 (614-8123)    | .55   | 3380 (1400-7603)   | 2860 (923-8075)    | .23   |
| <b>Plasma creatinine, <math>\mu\text{mol/L}</math></b> | 81 (70-96)         | 95 (80-126)        | <.001 | 69 (59-84)         | 83 (63-113)        | .072  | 85 (74-98)         | 97 (86-131)        | <.001 |
| <b>proANP, pmol/L</b>                                  | 822 (515-1315)     | 1005 (558-1742)    | .005  | 978 (664-1504)     | 1382 (747-2064)    | .019  | 758 (488-1241)     | 899 (508-1499)     | .10   |
| <b>hs-CRP <math>\geq 2</math> mg/L, n (%) *, †</b>     | 474 (65.0)         | 111 (63.1)         | .66   | 117 (67.2)         | 34 (68.0)          | >.99  | 357 (64.3)         | 77 (61.1)          | .54   |
| <b>ST2, ng/ml</b>                                      | 40.0 (29.1-56.8)   | 39.8 (30.4-59.7)   | .95   | 35.3 (27.0-55.0)   | 34.8 (26.2-58.4)   | .92   | 41.5 (30.2-57.5)   | 41.5 (32.1-60.0)   | .95   |
| <b>Syndecan-1, ng/ml<sup>b</sup></b>                   | 92.3 (64.2-137.0)  | 103.5 (69.4-154.0) | .001  | 82.2 (52.5-137.3)  | 99.3 (61.8-140.8)  | .21   | 94.4 (68.1-137.0)  | 113.5 (71.6-155.1) | .019  |
| <b>Soluble thrombomodulin, ng/ml<sup>b</sup></b>       | 7.35 (5.98-8.91)   | 8.49 (6.67-10.86)  | <.001 | 6.71 (5.42-8.15)   | 8.05 (6.16-10.80)  | .001  | 7.57 (6.19-9.18)   | 8.53 (6.70-10.87)  | .003  |
| <b>Follow-up, n (%)</b>                                |                    |                    |       |                    |                    |       |                    |                    |       |
| <b>Number of deaths within one year</b>                | 114 (7.7%)         | 35 (12.4%)         | .014  | 37 (9.6%)          | 19 (23.5%)         | .001  | 77 (7.1%)          | 16 (7.9%)          | .66   |
| <b>Cardiogenic shock</b>                               | 122 (8.3%)         | 34 (12.0%)         | .052  | 32 (8.3%)          | 15 (18.5%)         | .013  | 90 (8.3%)          | 19 (9.4%)          | .58   |
| <b>Cardiac arrest coma</b>                             | 66 (4.5%)          | 19 (6.7%)          | .13   | 14 (3.6%)          | 3 (3.7%)           | >.99  | 52 (4.8%)          | 16 (7.9%)          | .084  |

Continuous variables are given in median (inter-quartile range).

\* Only patients with a time from onset of symptoms to CAG of <6 hours were included.

† Only patients admitted at RH (313 females and 873 males) were included.

1  
2  
3  
4  
5  
6  
7  
8  
9  
10  
11  
12  
13  
14  
15  
16  
17  
18  
19  
20  
21  
22  
23  
24  
25  
26  
27  
28  
29  
30  
31  
32  
33  
34  
35  
36  
37  
38  
39  
40  
41  
42  
43  
44  
45  
46  
47

**Table 2. Cox regression analyses of mortality in patients with proCNP ≥ median.**

|                                                    |                  | Univariate |           |         | Model 1* |           |         | Model 2 † |           |         |
|----------------------------------------------------|------------------|------------|-----------|---------|----------|-----------|---------|-----------|-----------|---------|
|                                                    |                  | HR         | 95% CI    | P Value | HR       | 95% CI    | P Value | HR        | 95% CI    | P Value |
| <b>All patients with proCNP ≥ median (n = 928)</b> |                  |            |           |         |          |           |         |           |           |         |
| <b>ProCNP (per 1 pmol/L increase)</b>              | 30-day mortality | 1.02       | 1.01-1.03 | <.001   | 1.00     | 0.99-1.01 | .89     | 1.00      | 0.99-1.02 | .57     |
|                                                    | 1-year mortality | 1.02       | 1.01-1.03 | <.001   | 1.00     | 0.99-1.01 | .89     | 1.00      | 0.99-1.02 | .58     |
| <b>Females with proCNP ≥ median (n=260)</b>        |                  |            |           |         |          |           |         |           |           |         |
| <b>ProCNP (per 1 pmol/L increase)</b>              | 30-day mortality | 1.05       | 1.02-1.07 | <.001   | 1.04     | 1.01-1.07 | .008    | 1.04      | 1.01-1.07 | .016    |
|                                                    | 1-year mortality | 1.04       | 1.02-1.07 | <.001   | 1.03     | 1.01-1.06 | .010    | 1.04      | 1.01-1.06 | .007    |
| <b>Males with a proCNP ≥ median (n = 668)</b>      |                  |            |           |         |          |           |         |           |           |         |
| <b>ProCNP (per 1 pmol/L increase)</b>              | 30-day mortality | 1.02       | 1.01-1.03 | .001    | 1.00     | 0.98-1.02 | .86     | 1.00      | 0.98-1.02 | .92     |
|                                                    | 1-year mortality | 1.02       | 1.01-1.03 | <.001   | 1.00     | 0.98-1.01 | .72     | 1.00      | 0.98-1.02 | .86     |

\* Multivariable model with age and plasma creatinine included as co-variables.

† Multivariable model with age, plasma creatinine, proANP, tertiles of peak troponins, number of vessels affected, and time from onset of symptoms to blood sample included as co-variables.

HR, hazard ratio; CI, confidence interval.

**Table 3: Linear mixed models of longitudinal measurements of proCNP in 287 patients with STEMI.**

|                                    | <i>Univariate</i>       |                | <i>Model 1</i>          |                | <i>Model 2</i>          |                |
|------------------------------------|-------------------------|----------------|-------------------------|----------------|-------------------------|----------------|
|                                    | Value (95% CI) / pmol/L | <i>P</i> Value | Value (95% CI) / pmol/L | <i>P</i> Value | Value (95% CI) / pmol/L | <i>P</i> Value |
| <b>Time (per time point)</b>       | -1.3 (-2.1 – -0.5)      | .001           | -0.25 (-1.8 – 1.3)      | .75            | -0.25 (-1.8 – 1.3)      | .76            |
| <b>Age (per year)</b>              |                         |                | 0.16 (0.02 – 0.30)      | .02            | 0.06 (-0.08 – 0.20)     | .39            |
| <b>Sex (effect of male sex)</b>    |                         |                | 4.5 (-0.6 – 9.6)        | .09            | 4.4 (-0.28 – 9.1)       | .07            |
| <b>Interaction of time and sex</b> |                         |                | -1.4 (-3.2 – 0.4)       | .13            | -1.4 (-3.2 – 0.36)      | .13            |
| <b>Kidney disease</b>              |                         |                |                         |                | 19.7 (13.3 – 26.1)      | <.001          |
| <b>Hypertension</b>                |                         |                |                         |                | 4.5 (0.6 – 8.4)         | .03            |
| <b>Diabetes</b>                    |                         |                |                         |                | -4.0 (-9.7 – 1.7)       | .17            |
| <b>Peripheral artery disease</b>   |                         |                |                         |                | -5.1 (-13.9 – 3.7)      | .26            |
| <b>Stroke</b>                      |                         |                |                         |                | 2.7 (-5.3 – 10.7)       | .51            |

The table shows the associated estimated changes in proCNP concentration in pmol/L (95%CI) when each variable is entered in a linear mixed model.

CI, confidence interval.



1  
2  
3 **Figure 1. Mortality rates for increased and normal proCNP in all patients and stratified by sex.**  
4  
5

6 Display of all-cause mortality rates for groups of normal vs. increased proCNP concentrations in plasma. Graphs of 30-  
7 day and one-year mortality rate for all patients are shown in section A and B, respectively. Sex-specific 30-day and one-  
8 year mortality rates are shown in section C and D, respectively. The numbers of patients at risk in subgroups are given  
9 beneath each graph.  
10  
11  
12  
13  
14  
15  
16  
17  
18

19 **Figure 2. Longitudinal concentrations of proCNP in plasma.**  
20  
21

22 Concentrations are shown as mean (point) and standard error of the mean (error bars). ProCNP concentrations over time  
23 for 287 patients with STEMI are shown in section A. In section B, C, and D, these patients are grouped based on sex,  
24 hypertension, and kidney disease, respectively.  
25  
26  
27  
28  
29  
30  
31  
32  
33  
34  
35  
36  
37  
38  
39  
40  
41  
42  
43  
44  
45  
46  
47

1  
2  
3  
4  
5  
6  
7  
8  
9  
10  
11  
12  
13  
14  
15  
16  
17  
18  
19  
20  
21  
22  
23  
24  
25  
26  
27  
28  
29  
30  
31  
32  
33  
34  
35  
36  
37  
38  
39  
40  
41  
42  
43  
44  
45  
46  
47  
48  
49  
50  
51  
52  
53  
54  
55  
56  
57  
58  
59  
60

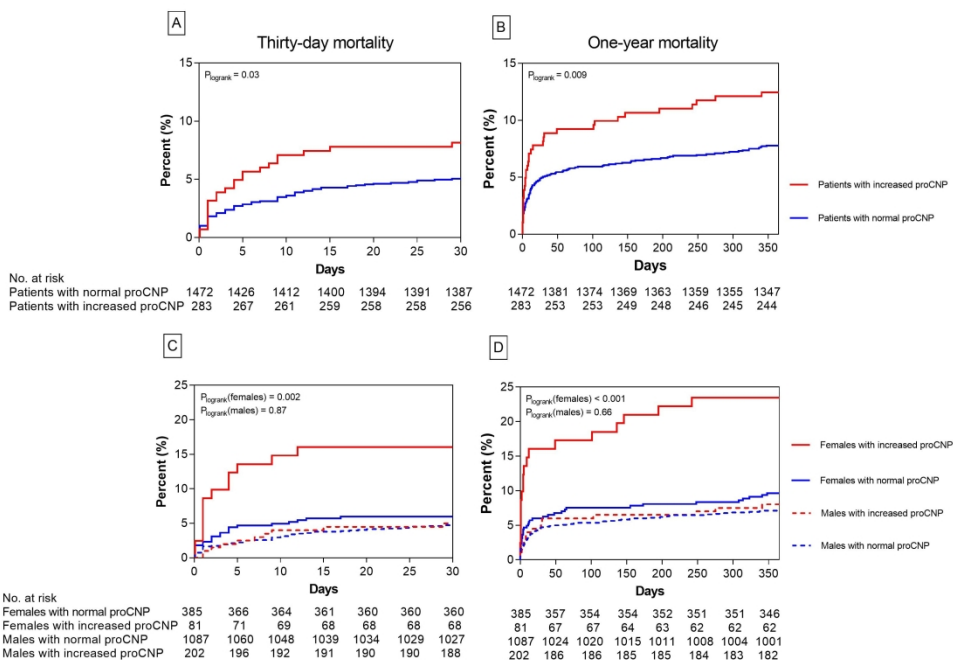

286x199mm (300 x 300 DPI)

1  
2  
3  
4  
5  
6  
7  
8  
9  
10  
11  
12  
13  
14  
15  
16  
17  
18  
19  
20  
21  
22  
23  
24  
25  
26  
27  
28  
29  
30  
31  
32  
33  
34  
35  
36  
37  
38  
39  
40  
41  
42  
43  
44  
45  
46  
47  
48  
49  
50  
51  
52  
53  
54  
55  
56  
57  
58  
59  
60

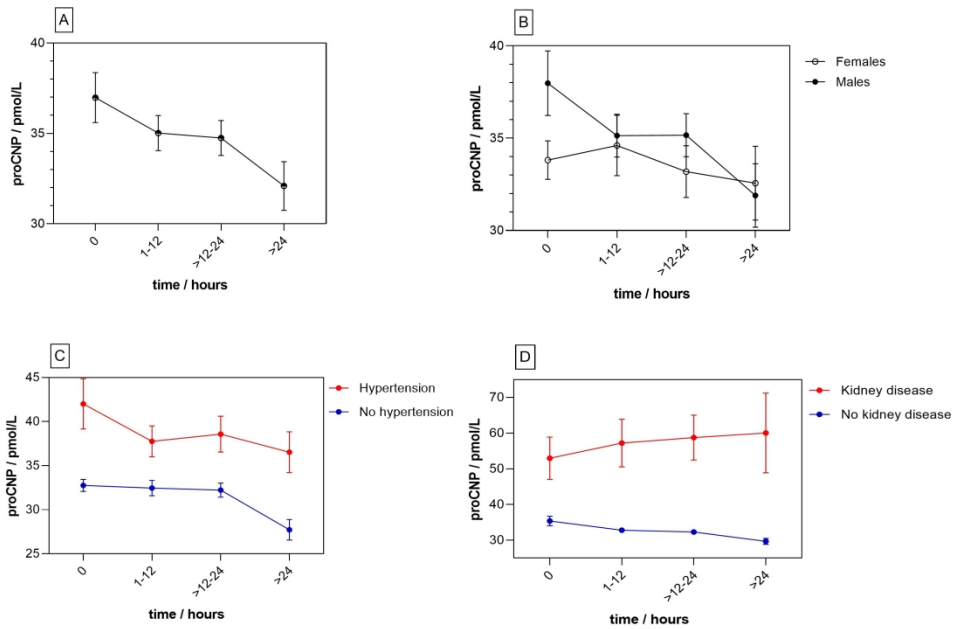

281x187mm (300 x 300 DPI)

# Supplemental Material

## METHODS

### COHORT OF PATIENTS WITH STEMI

Information on age, sex, height, body mass index (BMI), smoking status, development of cardiogenic shock, and cardiac arrest coma, time from onset of symptoms to blood sample, time from blood sample to percutaneous coronary intervention balloon angioplasty, number of coronary vessels affected (defined as the number coronary arteries with at least one stenosis of >70% of the lumen diameter (discrete values of zero to three) from the coronary angiography procedure (CAG)), culprit coronary vessel anatomy, Thrombolysis In Myocardial Infarction (TIMI ) grade flow, medical history, left ventricular ejection fraction (LVEF), and routine laboratory measurements was used in the data analyses. Blood samples for baseline biochemical measurements were collected from the femoral or radial sheath on admission immediately before CAG. LVEF was determined by 2D echocardiography performed on admission or within 48 hours of admission. From a consecutive subgroup of the cohort, we collected repeated venous plasma samples during the first days after admission from January to March 2016 at Rigshospitalet (RH) for longitudinal assessment of potential changes in proCNP concentrations. Longitudinal plasma samples were collected at least twice within the first day of admission, and once daily in subsequent days of admission.

### BIOCHEMICAL ANALYSES

1  
2  
3 1 Troponin T was measured in patients admitted to RH by Elecsys Troponin T hs assay  
4  
5 2 (Cobas, by Roche, Basel, Switzerland), whereas troponin I was measured in patients  
6  
7 3 admitted to Odense Universitetshospital (OUH) using Architect *STAT* High Sensitive  
8  
9 4 Troponin-I (Abbott, Chicago, Illinois, United States). Both measurements from samples  
10  
11 5 on admission and measured peak values during admission (the latter as a proxy of  
12  
13 6 myocardial infarction size), were used in our statistical analyses. Plasma creatinine was  
14  
15 7 measured using CREP2 assay and high sensitivity C-reactive protein (hs-CRP) using  
16  
17 8 CRPHS assay (Cobas, by Roche, Basel, Switzerland). ST2 was measured by Presage  
18  
19 9 ST2 Assay (Critical Diagnostics, Inc., San Diego, California). We included measurement  
20  
21 10 of soluble thrombomodulin (sTM) and syndecan-1 as markers of endothelial cell and  
22  
23 11 glyocalyx damage, respectively. Assay procedures of sTM and syndecan-1 have been  
24  
25 12 described previously.[1] With regards to measurement of hs-CRP, the results were  
26  
27 13 analyzed as the proportion of patients with a concentration of  $\geq 2$ mg/L. This cut-off value  
28  
29 14 has been introduced as a definition of chronic inflammation in cardiac disease.[2]  
30  
31 15 Moreover, patients with a time from onset of symptoms to blood sample of  $\geq 6$  hours are  
32  
33 16 excluded from hs-CRP analyses because an increase in hs-CRP concentration can be  
34  
35 17 expected due to myocardial damage.[3,4] For measurement of syndecan-1, sTM, and  
36  
37 18 hs-CRP, only patients admitted at RH were analyzed. All biochemical analytes, apart  
38  
39 19 from peak troponins and longitudinal proCNP and proANP, were measured in blood  
40  
41 20 samples collected on admission.  
42  
43  
44  
45  
46  
47  
48  
49  
50  
51  
52

## 53 22 **RESULTS**

54  
55  
56  
57  
58  
59  
60

## 1 PROCNP MEASUREMENT

2 Coefficients of variation of proCNP measurement in plasma were 13.8% for 20 pmol/L  
3 and 13.1% for 40 pmol/L.

## 4 REFERENCE POPULATION AND STEMI COHORT

5 By inspection of histograms of proCNP concentrations, we concluded that there were no  
6 outliers among the individuals. Table 1 shows sex- and age-specific 95% reference  
7 intervals of proCNP concentrations in the reference population. Plasma concentrations  
8 in males were marginally higher compared to those in females ( $P = 0.015$ ). Women  $\geq 50$   
9 years had higher proCNP concentrations compared to women  $< 50$  years ( $P = 0.011$ ),  
10 where no difference was observed among men ( $P = 0.44$ ). The distributions of proCNP  
11 concentrations in the reference population and the STEMI cohort are shown in  
12 Supplemental Figure 1.

14 **Supplemental Table 1. Reference intervals of proCNP in sex- and age-specific**  
15 **groups.**

|                        | Men         |             | Women       |             |
|------------------------|-------------|-------------|-------------|-------------|
| Age groups (years)     | <50         | $\geq 50$   | <50         | $\geq 50$   |
| Number of subjects     | 157         | 173         | 179         | 179         |
| 95% reference interval | 10.2 – 52.2 | 13.9 – 49.6 | 13.6 – 48.9 | 13.4 – 49.4 |
| Median                 | 35.2        | 36.0        | 32.2        | 34.6        |
| Range                  | 4.4 – 55.4  | 11.4 – 52.4 | 8.2 – 55.4  | 4.4 – 60.0  |

1  
2  
3  
4  
5  
6  
7  
8  
9  
10  
11  
12  
13  
14  
15  
16  
17  
18  
19  
20  
21  
22  
23  
24  
25  
26  
27  
28  
29  
30  
31  
32  
33  
34  
35  
36  
37  
38  
39  
40  
41  
42  
43  
44  
45  
46  
47  
48  
49  
50  
51  
52  
53  
54  
55  
56  
57  
58  
59  
60

- 1 Reference intervals, median, and range of proCNP concentrations of subgroups are all
- 2 given in pmol/L.

For peer review only

1 **Supplemental Figure 1. Histograms of relative frequencies of plasma proCNP**  
 2 **concentrations.**

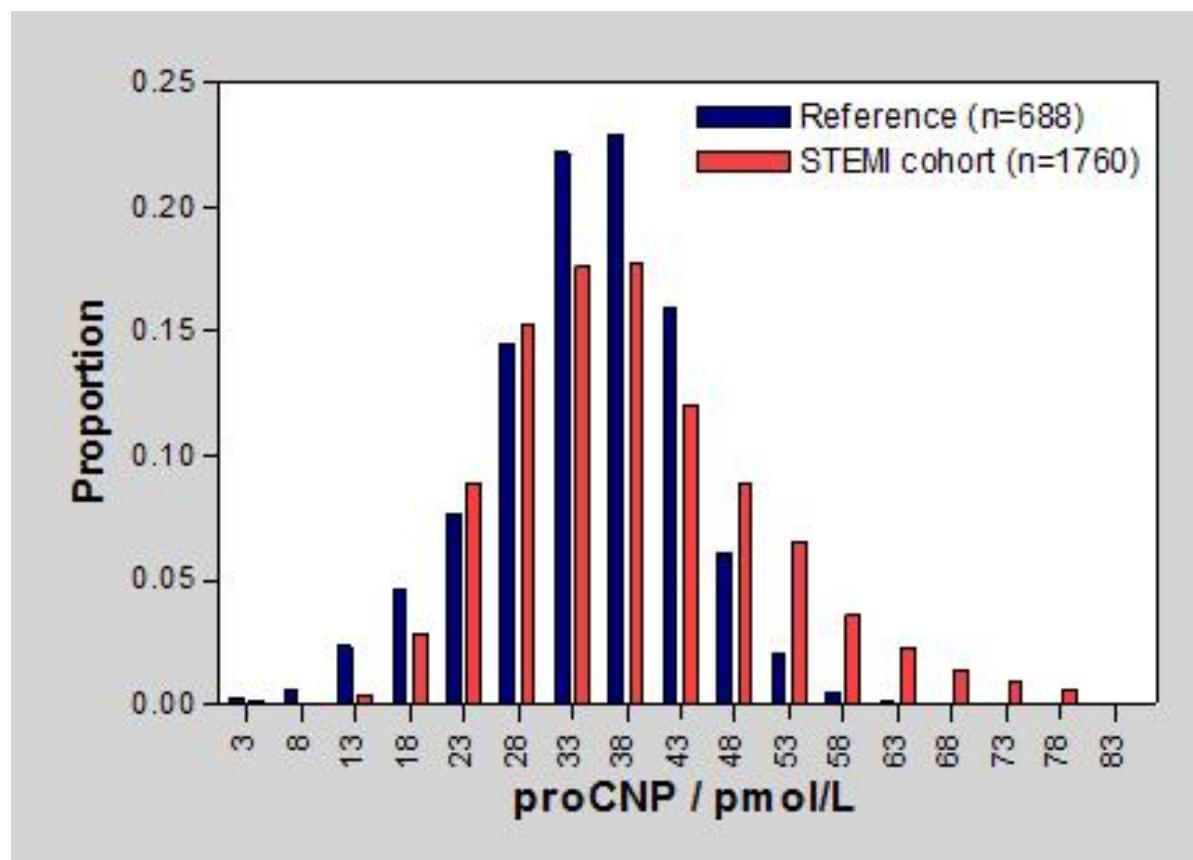

3  
 4 The reference population is represented by blue bars and the STEMI cohort by red  
 5 bars. Each bar represents an interval of 5 pmol/L.

6 Values of >85 pmol/L are not shown.

7  
 8 **Cardiogenic shock development and cardiac arrest**

9 When median proCNP concentrations were tested in patients with cardiogenic shock  
 10 development vs. no cardiogenic shock development and cardiac arrest coma vs. no



1  
2  
3 1 cardiac arrest coma or cardiogenic shock development, no differences were observed  
4  
5 2 ( $P = 0.41$  and  $P = 0.28$  for females, respectively, and  $P = 0.97$  and  $P = 0.46$  for males,  
6  
7 3 respectively).

10  
11 4  
12  
13  
14 5 **Time from onset of symptoms to blood sample and correlation of biochemical**  
15  
16 6 **markers**

17  
18  
19 7 In Supplemental Figure 2, median plasma proCNP concentrations are shown in  
20  
21 8 subgroups of different time intervals from onset of symptoms to blood sample. A  
22  
23 9 difference in proCNP was observed across subgroups ( $P < 0.001$ ). However, when  
24  
25 10 patients with a time interval of  $>24$  hours were excluded, no difference was found ( $P =$   
26  
27 11  $0.091$ ). Information on time from baseline blood sampling (performed when the CAG  
28  
29 12 procedure was initiated) to percutaneous coronary intervention balloon angioplasty  
30  
31 13 (time of reperfusion) was obtained on 862 patients (227 women, 635 men). Median  
32  
33 14 (interquartile range) values in minutes were: 5 (4-9) and 5 (3-9) ( $P = 0.90$ ) for women  
34  
35 15 with normal and increased proCNP respectively, and 6 (4-10) and 5 (4-10) ( $P = 0.17$ ) for  
36  
37 16 men with normal and increased proCNP respectively. For biochemical markers with  
38  
39 17 positive associations to proCNP, we performed Spearman's correlation analyses, and  
40  
41 18 for proCNP vs. creatinine, proANP, syndecan-1, and sTM, Spearman  $r$  were 0.26,  
42  
43 19 0.082, 0.098, and 0.24, respectively ( $P < 0.001$  for all).  
44  
45  
46  
47  
48  
49  
50  
51  
52  
53  
54  
55  
56  
57  
58  
59  
60

1 **Supplemental Figure 2: Box-plots of proCNP concentrations in groups of time**  
 2 **from onset of symptoms to admission.**

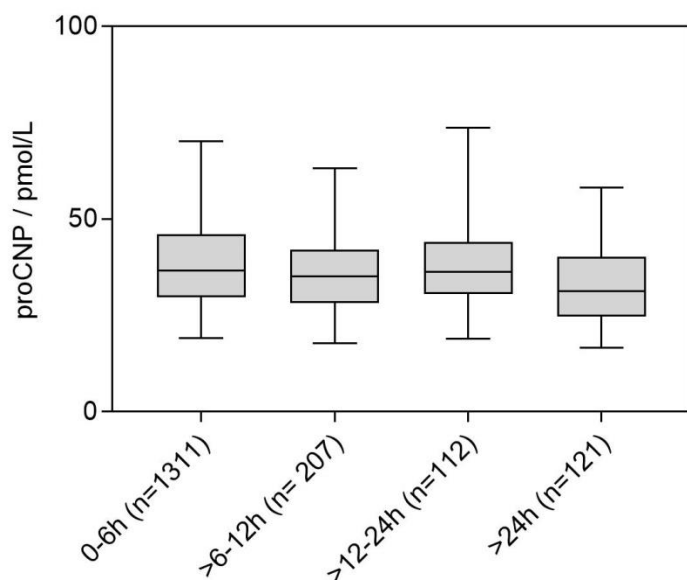

3  
 4 Boxes indicate median and inter-quartile range, and error bars indicate the interval from  
 5 2.5 to 97.5 percentile.

6  
 7 **Multivariable Cox regression analyses**

8 We examined the effect of proCNP concentrations as a continuous variable on the  
 9 hazard ratio (HR) of one-year all-cause death in all patients as well as females and  
 10 males separately by cubic spline plots, using median concentrations as a reference  
 11 point (shown in Supplemental Figure 3). In females, there was no effect of proCNP  
 12 below median concentrations, whereas the estimated HR increased from approximately  
 13 median concentrations to the highest measured concentrations. In males, a trend

1 towards a U-shaped relation was observed with increasing estimated hazard ratios for  
2 decreases of proCNP below median and for increases of proCNP above median. Based  
3 on these observations we focused our Cox regression analyses on the upper range of  
4 proCNP, where we observed that increasing proCNP was associated with increasing  
5 HR in both females and males.

6  
7 **Supplemental Figure 3: Cubic spline and density plots of hazard ratio and**  
8 **proCNP concentrations.**

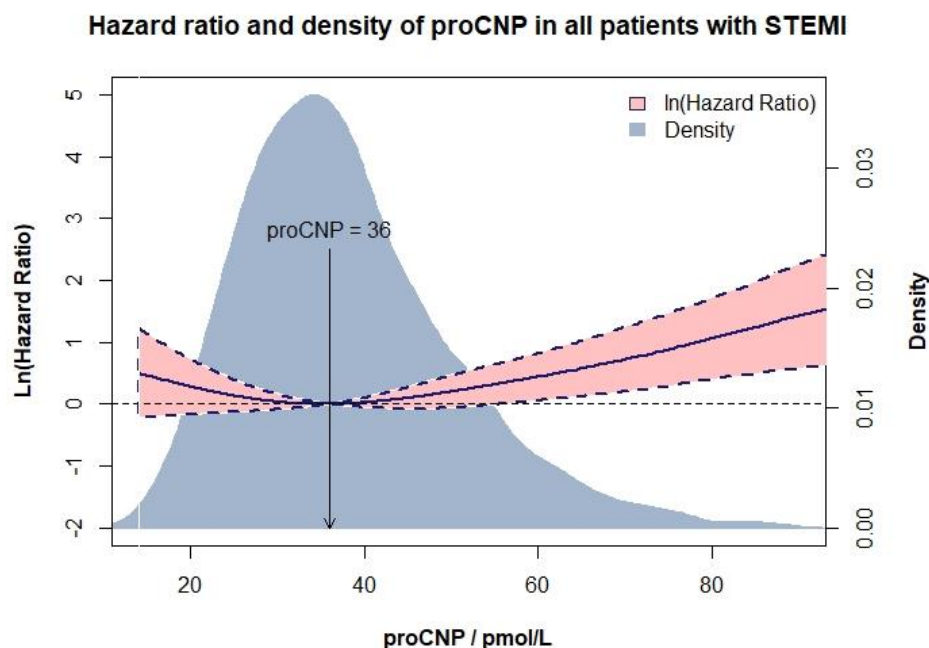

9

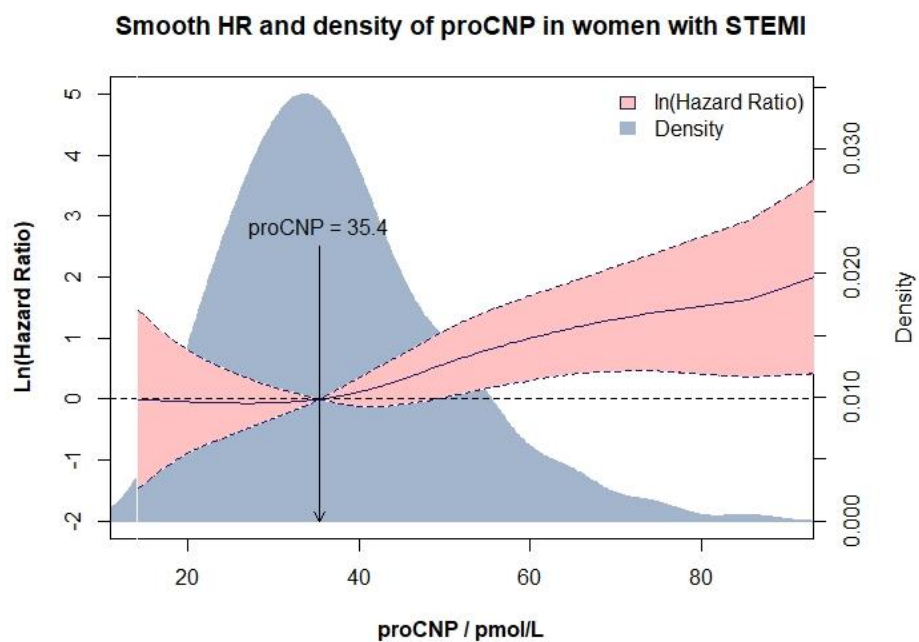

24  
25  
26  
27  
28  
29

1

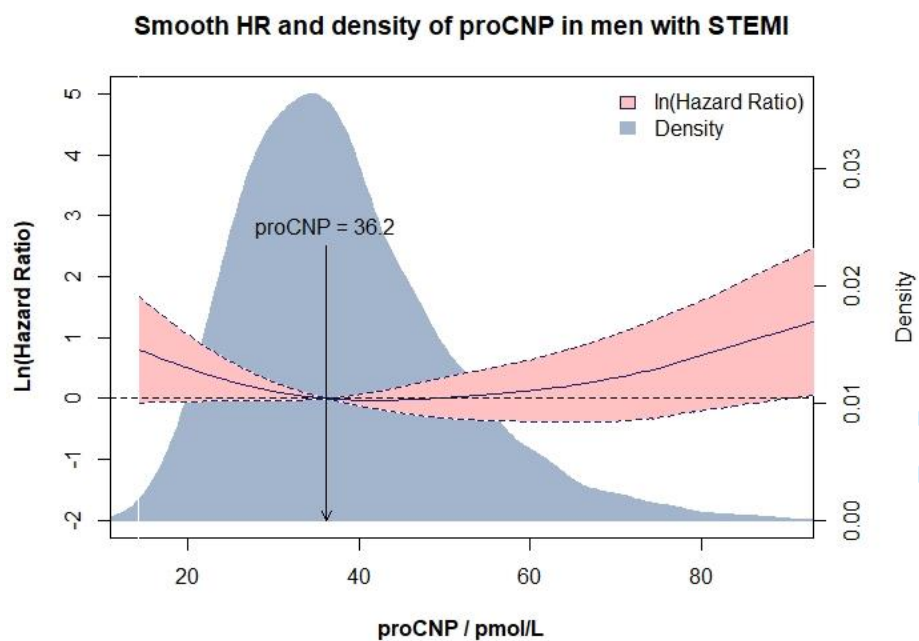

30  
31  
32  
33  
34  
35  
36  
37  
38  
39  
40  
41  
42  
43  
44  
45  
46  
47

2

48  
49  
50  
51  
52  
53

3

54  
55  
56  
57  
58  
59  
60

4

## 1 Longitudinal plasma measurements

2 In Supplemental Table 2, the number of patients and samples in groups stratified  
 3 according to diseases are shown. Longitudinal measurements of proANP are shown in  
 4 Supplemental Figure 4, where the initial decrease from first (0 hours) to second (1-12  
 5 hours) timepoint is estimated to be ~850 pmol/L (~85%).

### 7 Supplemental Table 2: Number of patients and plasma samples in longitudinal 8 analyses.

|                       | Number of patients<br>(females/males) | Number of samples<br>(from females/from<br>males) |
|-----------------------|---------------------------------------|---------------------------------------------------|
| <b>Overall</b>        | 287 (64/223)                          | 907 (211/696)                                     |
| <b>Kidney disease</b> | 26 (6/20)                             | 81 (20/61)                                        |
| <b>Hypertension</b>   | 131 (32/99)                           | 412 (96/316)                                      |
| <b>Diabetes</b>       | 34 (8/26)                             | 107 (20/87)                                       |
| <b>Stroke</b>         | 15 (5/10)                             | 46 (16/30)                                        |
| <b>PAD</b>            | 12 (2/10)                             | 40 (6/34)                                         |

1 **Supplemental Figure 4: Longitudinal concentrations of proANP in plasma.**

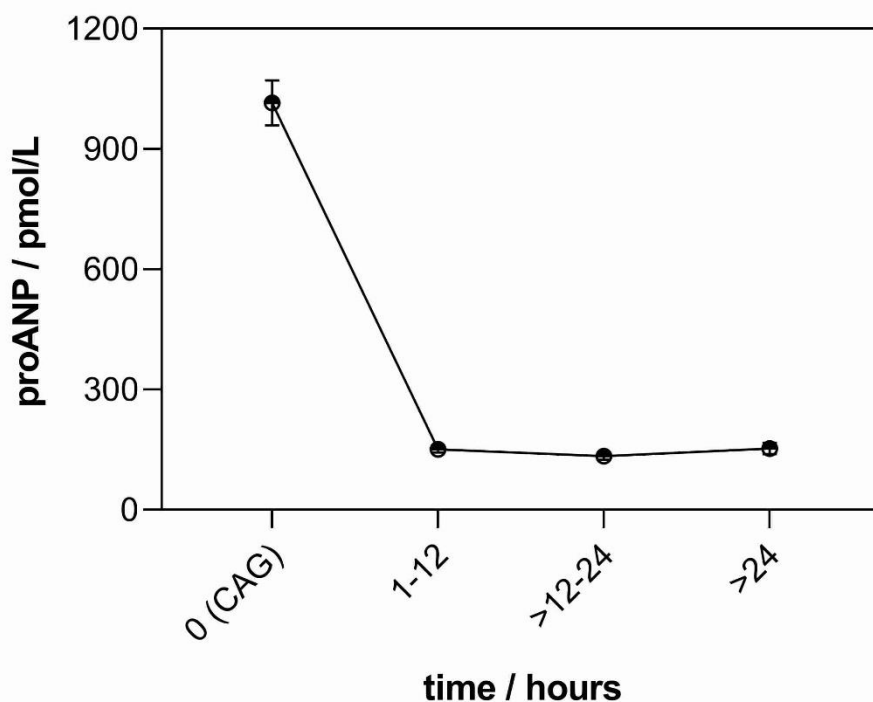

2  
3 Concentrations are shown as mean (SEM) for patients with longitudinal plasma  
4 samples.

## 5 **DISCUSSION**

### 6 *Assay Principle*

7 Our proCNP radioimmunoassay is developed in accordance with a processing-  
8 independent principle,[5,6] where different fragments of the prohormone of CNP can be  
9 accurately quantitated in circulation regardless of post-translational processing of the  
10 prohormone. Also, there is no cross-reactivity to the structurally related cardiac  
11 natriuretic propeptides.[7]

1  
2  
3 1  
4  
56 2 *Reference Intervals*  
7  
8

9 3 We based our calculated 95% reference intervals on two age groups of < and ≥ 50  
10 4 years. The reason for choosing this division is a previous report showing that NT-  
11 5 proCNP concentrations in plasma in healthy individuals increase from ~50 years of  
12 6 age.[8] We therefore assume that the two age groups represent two different stages of  
13 7 adulthood with regard to circulating NT-proCNP concentrations and, hence, that the two  
14 8 age-specific intervals (for each sex) constitute a meaningful reference for interpretation  
15 9 of measured proCNP concentrations in the STEMI cohort.

10 *Time from onset of symptoms to blood sampling and balloon angioplasty*  
11

12 11 In our baseline and multivariable Cox regressions analyses we have included the time  
13 12 from onset of symptoms as a variable, where we have data from the 99.5% of the  
14 13 included patients. Our results on time from blood sampling to balloon angioplasty (data  
15 14 was obtained from 49.1% of the included patients) show no differences in time between  
16 15 groups of normal and increased proCNP in both sexes, where the median time duration  
17 16 was 5-6 minutes in all groups. Assuming that the total ischemic time of the STEMI  
18 17 patients is equal to the time from onset of symptoms to balloon angioplasty (time of  
19 18 reperfusion), our analyses support that the time onset of symptoms to blood sampling  
20 19 as a variable also reflects the total ischemic time of the patients.

20 *Correlation Analyses of Biochemical Measurements*  
21  
22  
23  
24  
25  
26  
27  
28  
29  
30  
31  
32  
33  
34  
35  
36  
37  
38  
39  
40  
41  
42  
43  
44  
45  
46  
47  
48  
49  
50  
51  
52  
53  
54  
55  
56  
57  
58  
59  
60

1 Correlation analyses showed that the association of proCNP with sTM is superior in  
2 comparison to both that of syndecan-1 and proANP. A likely explanation may be that  
3 both proCNP and sTM are released from endothelial cells, whereas the glycocalyx and  
4 the cardiomyocytes are the major sources of syndecan-1 and proANP, respectively. In  
5 contrast to the vascular markers, however, no associations with markers of  
6 inflammation, hs-CRP, and ST2 were observed. Thus, proCNP concentrations in  
7 plasma do not seem to be affected by general inflammation in patients with STEMI.

### 8 *Longitudinal Analyses*

9 Repeated measurements displayed a statistically significant decrease in proCNP  
10 concentrations over time in a univariate analysis. For comparison we have included  
11 repeated measurements of proANP, shown in Supplemental Figure 4. The dynamic  
12 response of proANP differs markedly from proCNP with a steep decrease from 0 to 1-12  
13 hours and a flat curve from 1-12 to >24 hours. These differences highlight the distinct  
14 biological roles of CNP vs. ANP.

15 For proCNP, both multivariate linear mixed models (Model 1 and 2) show that the effect  
16 of time was reduced in magnitude and was non-significant, indicating that changes over  
17 time are better explained by other variables than time per se. Model 1 found an  
18 independent effect of age with higher concentrations of proCNP per year, but Model 2  
19 found that the effect of age disappeared when kidney disease and other vascular  
20 diseases were included. Thus, age per se does not seem to explain an increase in  
21 proCNP concentration; more likely, chronic diseases (where prevalence increases with  
22 age) appear a confounder of the crude effect of age. Although a statistically insignificant



1  
2  
3 1 finding, Model 1 indicates an effect of male sex and an interaction of sex and time that  
4  
5 2 are unchanged after inclusion of chronic diseases in Model 2. Consistent with the effect  
6  
7 3 of male sex are previously reported results[8] and the results of the reference population  
8  
9 4 of the present study, where males have slightly higher concentrations of proCNP-  
10  
11 5 derived peptides in the circulation. The possible interaction of sex and time, where  
12  
13 6 males display a relative decrease over time compared with females, has not previously  
14  
15 7 been reported. However, our longitudinal analyses lack the statistical power to  
16  
17 8 sufficiently conclude on a potential interaction of sex and time on proCNP  
18  
19 9 concentrations. In model 2, we find that kidney disease and hypertension are  
20  
21 10 independently associated with higher proCNP concentrations, consistent with baseline  
22  
23 11 associations.

24  
25  
26  
27  
28  
29 12 Of the (cardio)vascular diseases with a crude positive association to increased proCNP  
30  
31 13 in baseline results, only hypertension is statistically independent in the multivariate  
32  
33 14 repeated measurement analysis. Unexpectedly, the independent effects of diabetes  
34  
35 15 mellitus and peripheral artery disease seem to be oppositely directed, where the  
36  
37 16 diseases are independently associated with lower proCNP concentrations. However,  
38  
39 17 these results were statistically insignificant, and further studies with more statistical  
40  
41 18 power are needed to determine if such negative independent associations exist.  
42  
43  
44  
45

46 19  
47  
48  
49  
50  
51  
52  
53  
54  
55  
56  
57  
58  
59  
60

## 1     **References**

- 2     1     Frydland M, Ostrowski SR, Møller JE, *et al*. Plasma concentration of biomarkers  
3     reflecting endothelial cell- and glycocalyx damage are increased in patients with  
4     suspected st-elevation myocardial infarction complicated by cardiogenic shock. *Shock*  
5     2018;**50**:538–44. doi:10.1097/SHK.0000000000001123
- 6     2     Libby P, Ridker PM, Hansson GK. Inflammation in Atherosclerosis. From  
7     Pathophysiology to Practice. *J Am Coll Cardiol* 2009;**54**:2129–38.  
8     doi:10.1016/j.jacc.2009.09.009
- 9     3     Ramasamy I. Biochemical markers in acute coronary syndrome. *Clin Chim Acta*  
10     2011;**412**:1279–96. doi:10.1016/j.cca.2011.04.003
- 11     4     Cristell N, Cianflone D, Durante A, *et al*. High-sensitivity C-reactive protein is within  
12     normal levels at the very onset of first ST-segment elevation acute myocardial infarction  
13     in 41% of cases: A multiethnic case-control study. *J Am Coll Cardiol* 2011;**58**:2654–61.  
14     doi:10.1016/j.jacc.2011.08.055
- 15     5     Lippert SK, Rehfeld JF, Goetze JP. Processing-independent analysis for pro-C-type  
16     natriuretic peptide. *J Immunol Methods* 2010;**362**:32–7. doi:10.1016/j.jim.2010.08.003
- 17     6     Rehfeld J, Goetze J. The Posttranslational Phase of Gene Expression: New Possibilities  
18     in Molecular Diagnosis. *Curr Mol Med* 2005;**3**:25–38. doi:10.2174/1566524033361717
- 19     7     Nielsen SJ, Rehfeld JF, Goetze JP. Mismeasure of C-type natriuretic peptide [7]. *Clin.*  
20     *Chem.* 2008;**54**:225–7. doi:10.1373/clinchem.2007.096172
- 21     8     Prickett TCR, Olney RC, Cameron VA, *et al*. Impact of age, phenotype and cardio-renal  
22     function on plasma C-type and B-type natriuretic peptide forms in an adult population.

1  
2  
3  
4  
5  
6  
7  
8  
9  
10  
11  
12  
13  
14  
15  
16  
17  
18  
19  
20  
21  
22  
23  
24  
25  
26  
27  
28  
29  
30  
31  
32  
33  
34  
35  
36  
37  
38  
39  
40  
41  
42  
43  
44  
45  
46  
47  
48  
49  
50  
51  
52  
53  
54  
55  
56  
57  
58  
59  
60

1            *Clin Endocrinol (Oxf)* 2013;**78**:783–9. doi:10.1111/cen.12035

2

For peer review only

STROBE Statement—Checklist of items that should be included in reports of *cohort studies*

|                              | Item No | Recommendation                                                                                                                                                                                                                                                                                                         | Page No                                               |
|------------------------------|---------|------------------------------------------------------------------------------------------------------------------------------------------------------------------------------------------------------------------------------------------------------------------------------------------------------------------------|-------------------------------------------------------|
| <b>Title and abstract</b>    | 1       | (a) Indicate the study's design with a commonly used term in the title or the abstract<br>(b) Provide in the abstract an informative and balanced summary of what was done and what was found                                                                                                                          | 1<br>3-4                                              |
| <b>Introduction</b>          |         |                                                                                                                                                                                                                                                                                                                        |                                                       |
| Background/rationale         | 2       | Explain the scientific background and rationale for the investigation being reported                                                                                                                                                                                                                                   | 7-8                                                   |
| Objectives                   | 3       | State specific objectives, including any prespecified hypotheses                                                                                                                                                                                                                                                       | 7-8                                                   |
| <b>Methods</b>               |         |                                                                                                                                                                                                                                                                                                                        |                                                       |
| Study design                 | 4       | Present key elements of study design early in the paper                                                                                                                                                                                                                                                                | 8-12                                                  |
| Setting                      | 5       | Describe the setting, locations, and relevant dates, including periods of recruitment, exposure, follow-up, and data collection                                                                                                                                                                                        | 8-11                                                  |
| Participants                 | 6       | (a) Give the eligibility criteria, and the sources and methods of selection of participants. Describe methods of follow-up<br>(b) For matched studies, give matching criteria and number of exposed and unexposed                                                                                                      | 8-10                                                  |
| Variables                    | 7       | Clearly define all outcomes, exposures, predictors, potential confounders, and effect modifiers. Give diagnostic criteria, if applicable                                                                                                                                                                               | 8-11 +<br>suppl.                                      |
| Data sources/<br>measurement | 8*      | For each variable of interest, give sources of data and details of methods of assessment (measurement). Describe comparability of assessment methods if there is more than one group                                                                                                                                   | 8-10 +<br>suppl.                                      |
| Bias                         | 9       | Describe any efforts to address potential sources of bias                                                                                                                                                                                                                                                              | -                                                     |
| Study size                   | 10      | Explain how the study size was arrived at                                                                                                                                                                                                                                                                              | 8                                                     |
| Quantitative variables       | 11      | Explain how quantitative variables were handled in the analyses. If applicable, describe which groupings were chosen and why                                                                                                                                                                                           | 10-11                                                 |
| Statistical methods          | 12      | (a) Describe all statistical methods, including those used to control for confounding<br>(b) Describe any methods used to examine subgroups and interactions<br>(c) Explain how missing data were addressed<br>(d) If applicable, explain how loss to follow-up was addressed<br>(e) Describe any sensitivity analyses | 10-12<br>+<br>suppl.                                  |
| <b>Results</b>               |         |                                                                                                                                                                                                                                                                                                                        |                                                       |
| Participants                 | 13*     | (a) Report numbers of individuals at each stage of study—eg numbers potentially eligible, examined for eligibility, confirmed eligible, included in the study, completing follow-up, and analysed<br><br>(b) Give reasons for non-participation at each stage<br>(c) Consider use of a flow diagram                    | 12-15<br>+<br>table<br>1-2 +<br>figure<br>1<br>+suppl |
| Descriptive data             | 14*     | (a) Give characteristics of study participants (eg demographic, clinical, social) and information on exposures and potential confounders                                                                                                                                                                               | 12-15<br>+<br>table<br>1-2 +<br>figure<br>1           |

1  
2  
3  
4  
5  
6  
7  
8  
9  
10  
11  
12  
13  
14  
15  
16  
17  
18  
19  
20  
21  
22  
23  
24  
25  
26  
27  
28  
29  
30  
31  
32  
33  
34  
35  
36  
37  
38  
39  
40  
41  
42  
43  
44  
45  
46  
47  
48  
49  
50  
51  
52  
53  
54  
55  
56  
57  
58  
59  
60

|              |     |                                                                                     |                             |
|--------------|-----|-------------------------------------------------------------------------------------|-----------------------------|
|              |     | (b) Indicate number of participants with missing data for each variable of interest | +suppl                      |
|              |     | (c) Summarise follow-up time (eg, average and total amount)                         |                             |
| Outcome data | 15* | Report numbers of outcome events or summary measures over time                      | table 2<br>+<br>figure<br>1 |

For peer review only

|                                                       |                          |    |                                                                                                                                                                                                                                                                                                                                                                                                                   |                                                         |
|-------------------------------------------------------|--------------------------|----|-------------------------------------------------------------------------------------------------------------------------------------------------------------------------------------------------------------------------------------------------------------------------------------------------------------------------------------------------------------------------------------------------------------------|---------------------------------------------------------|
| 1<br>2<br>3<br>4<br>5<br>6<br>7<br>8<br>9<br>10<br>11 | Main results             | 16 | (a) Give unadjusted estimates and, if applicable, confounder-adjusted estimates and their precision (eg, 95% confidence interval). Make clear which confounders were adjusted for and why they were included<br><br>(b) Report category boundaries when continuous variables were categorized<br>(c) If relevant, consider translating estimates of relative risk into absolute risk for a meaningful time period | 12-15<br>+<br>table<br>1-2 +<br>figure<br>1<br>+suppl   |
| 12<br>13<br>14<br>15<br>16<br>17<br>18                | Other analyses           | 17 | Report other analyses done—eg analyses of subgroups and interactions, and sensitivity analyses                                                                                                                                                                                                                                                                                                                    | 12-15<br>+<br>table<br>1-2 +<br>figure<br>1-2<br>+suppl |
| 19                                                    | <b>Discussion</b>        |    |                                                                                                                                                                                                                                                                                                                                                                                                                   |                                                         |
| 20                                                    | Key results              | 18 | Summarise key results with reference to study objectives                                                                                                                                                                                                                                                                                                                                                          | 15-19                                                   |
| 21<br>22<br>23                                        | Limitations              | 19 | Discuss limitations of the study, taking into account sources of potential bias or imprecision. Discuss both direction and magnitude of any potential bias                                                                                                                                                                                                                                                        | 18                                                      |
| 24<br>25                                              | Interpretation           | 20 | Give a cautious overall interpretation of results considering objectives, limitations, multiplicity of analyses, results from similar studies, and other relevant evidence                                                                                                                                                                                                                                        | 15-19                                                   |
| 26<br>27                                              | Generalisability         | 21 | Discuss the generalisability (external validity) of the study results                                                                                                                                                                                                                                                                                                                                             | 15-18                                                   |
| 28                                                    | <b>Other information</b> |    |                                                                                                                                                                                                                                                                                                                                                                                                                   |                                                         |
| 29<br>30<br>31<br>32                                  | Funding                  | 22 | Give the source of funding and the role of the funders for the present study and, if applicable, for the original study on which the present article is based                                                                                                                                                                                                                                                     |                                                         |

\*Give information separately for exposed and unexposed groups.

**Note:** An Explanation and Elaboration article discusses each checklist item and gives methodological background and published examples of transparent reporting. The STROBE checklist is best used in conjunction with this article (freely available on the Web sites of PLoS Medicine at <http://www.plosmedicine.org/>, Annals of Internal Medicine at <http://www.annals.org/>, and Epidemiology at <http://www.epidem.com/>). Information on the STROBE Initiative is available at <http://www.strobe-statement.org>.

# BMJ Open

## Sex-specific Mortality Prediction by Pro-C-type Natriuretic Peptide Measurement in a Prospective Cohort of Patients with ST-elevation Myocardial Infarction

|                                 |                                                                                                                                                                                                                                                                                                                                                                                                                                                                                                                                                                                                                                                                                                                                             |
|---------------------------------|---------------------------------------------------------------------------------------------------------------------------------------------------------------------------------------------------------------------------------------------------------------------------------------------------------------------------------------------------------------------------------------------------------------------------------------------------------------------------------------------------------------------------------------------------------------------------------------------------------------------------------------------------------------------------------------------------------------------------------------------|
| Journal:                        | <i>BMJ Open</i>                                                                                                                                                                                                                                                                                                                                                                                                                                                                                                                                                                                                                                                                                                                             |
| Manuscript ID                   | bmjopen-2020-048312.R1                                                                                                                                                                                                                                                                                                                                                                                                                                                                                                                                                                                                                                                                                                                      |
| Article Type:                   | Original research                                                                                                                                                                                                                                                                                                                                                                                                                                                                                                                                                                                                                                                                                                                           |
| Date Submitted by the Author:   | 22-Apr-2021                                                                                                                                                                                                                                                                                                                                                                                                                                                                                                                                                                                                                                                                                                                                 |
| Complete List of Authors:       | Mark, Peter; Copenhagen University Hospital, Clinical Biochemistry<br>Frydland, Martin; Copenhagen University Hospital, Cardiology<br>Helgestad, Ole ; Odense Universitetshospital, Cardiology<br>Holmvang, Lene; Copenhagen University Hospital, Rigshospitalet, Cardiology<br>Møller, Jacob; Odense Universitetshospital, Department of cardiology<br>Johansson, Pär I; Copenhagen University Hospital, Clinical Immunology<br>Ostrowski, Sisse; Copenhagen University Hospital, Clinical Immunology<br>Prickett, Timothy; Otago University Canterbury Medical Library, Cardiology<br>Hassager, Christian; The University Hospital of Copenhagen, Cardiology<br>Goetze, Jens Peter; Copenhagen University Hospital, Clinical Biochemistry |
| <b>Primary Subject Heading</b>: | Cardiovascular medicine                                                                                                                                                                                                                                                                                                                                                                                                                                                                                                                                                                                                                                                                                                                     |
| Secondary Subject Heading:      | Intensive care                                                                                                                                                                                                                                                                                                                                                                                                                                                                                                                                                                                                                                                                                                                              |
| Keywords:                       | Myocardial infarction < CARDIOLOGY, Cardiology < INTERNAL MEDICINE, Adult cardiology < CARDIOLOGY                                                                                                                                                                                                                                                                                                                                                                                                                                                                                                                                                                                                                                           |
|                                 |                                                                                                                                                                                                                                                                                                                                                                                                                                                                                                                                                                                                                                                                                                                                             |

SCHOLARONE™  
Manuscripts



I, the Submitting Author has the right to grant and does grant on behalf of all authors of the Work (as defined in the below author licence), an exclusive licence and/or a non-exclusive licence for contributions from authors who are: i) UK Crown employees; ii) where BMJ has agreed a CC-BY licence shall apply, and/or iii) in accordance with the terms applicable for US Federal Government officers or employees acting as part of their official duties; on a worldwide, perpetual, irrevocable, royalty-free basis to BMJ Publishing Group Ltd ("BMJ") its licensees and where the relevant Journal is co-owned by BMJ to the co-owners of the Journal, to publish the Work in this journal and any other BMJ products and to exploit all rights, as set out in our [licence](#).

The Submitting Author accepts and understands that any supply made under these terms is made by BMJ to the Submitting Author unless you are acting as an employee on behalf of your employer or a postgraduate student of an affiliated institution which is paying any applicable article publishing charge ("APC") for Open Access articles. Where the Submitting Author wishes to make the Work available on an Open Access basis (and intends to pay the relevant APC), the terms of reuse of such Open Access shall be governed by a Creative Commons licence – details of these licences and which [Creative Commons](#) licence will apply to this Work are set out in our licence referred to above.

Other than as permitted in any relevant BMJ Author's Self Archiving Policies, I confirm this Work has not been accepted for publication elsewhere, is not being considered for publication elsewhere and does not duplicate material already published. I confirm all authors consent to publication of this Work and authorise the granting of this licence.



1  
2  
3 1 **Sex-specific Mortality Prediction by Pro-C-type Natriuretic Peptide Measurement**  
4  
5 2 **in a Prospective Cohort of Patients with ST-elevation Myocardial Infarction**  
6  
7

8 3 Peter D. Mark, MD<sup>1</sup>; Martin Frydland, MD<sup>2</sup>; Ole K. L. Helgestad, MD<sup>3</sup>; Lene Holmvang,  
9 MD, DMSc<sup>3</sup>; Jacob E. Møller, MD, DMSc<sup>3</sup>; Pär I. Johansson, MD, DMSc<sup>4</sup>; Sisse R.  
10 Ostrowski, MD, DMSc<sup>4</sup>; Timothy C. R. Prickett, PhD<sup>5</sup>; Christian Hassager, MD, DMSc<sup>2</sup>;  
11 Jens P. Goetze, MD, DMSc<sup>1,6</sup>  
12

13 7 <sup>1</sup>Department of Clinical Biochemistry, Copenhagen University Hospital, Rigshospitalet,  
14 8 Copenhagen, Denmark

15 9 <sup>2</sup>Department of Cardiology, Copenhagen University Hospital, Rigshospitalet,  
16 10 Copenhagen, Denmark

17 11 <sup>3</sup>Department of Cardiology, Odense University Hospital, Odense, Denmark

18 12 <sup>4</sup>Department of Clinical Immunology, Copenhagen University Hospital, Rigshospitalet,  
19 13 Copenhagen, Denmark

20 14 <sup>5</sup>Department of Medicine, University of Otago, Christchurch, New Zealand

21 15 <sup>6</sup>Department of Biomedical Sciences, Faculty of Health Sciences, Copenhagen  
22 16 University, Copenhagen, Denmark

23 17  
24 18 **Word count (Introduction to conclusion):** 3319

25 19 **Correspondence:** Jens P. Goetze, MD, DMSc

26 20 Professor, Chief Physician

27 21 Department of Clinical Biochemistry KB3013

28 22 9 Blegdamsvej, DK-2100 Copenhagen, Denmark

29 23 Phone: +45-3545-2202, Fax: +45-3545-2880, E-mail: JPG@dadlnet.dk

30 24 **Keywords:** Natriuretic peptides, C-type natriuretic peptide, CNP, ANP, Reference  
31 25 intervals, Myocardial infarction.

1  
2  
3 1 **List of abbreviations:** CNP, C-type natriuretic peptide; ACS, acute coronary syndrome;  
4  
5 2 NT-proCNP, amino-terminal proCNP; STEMI, ST-elevation myocardial infarction;  
6  
7 3 proCNP (see Nomenclature); NOBIDA, Nordic Reference Interval Project Biobank and  
8  
9 4 Database; RH, Copenhagen University Hospital, Rigshospitalet; OUH, Odense  
10  
11 5 University Hospital; CAG, coronary angiography; ECG, electrocardiogram; BMI, body  
12  
13 6 mass index; LVEF, left ventricular ejection fraction; hs-CRP, high sensitivity c-reactive  
14  
15 7 protein; sTM, soluble thrombomodulin.  
16  
17  
18  
19  
20  
21  
22  
23  
24  
25  
26  
27  
28  
29  
30  
31  
32  
33  
34  
35  
36  
37  
38  
39  
40  
41  
42  
43  
44  
45  
46  
47  
48  
49  
50  
51  
52  
53  
54  
55  
56  
57  
58  
59  
60

## 1 **Abstract**

2 **Objective:** To determine the predictive value of pro-C-type natriuretic peptide (proCNP)  
3 measurement in plasma sampled on admission from patients presenting with ST-  
4 elevation myocardial infarction (STEMI).

5 **Design:** Prospective cohort study.

6 **Setting:** Two University Hospitals in Denmark.

7 **Participants:** 1760 consecutive patients (470 females and 1290 males) with confirmed  
8 STEMI.

9 **Main Outcomes and Measures:** The main outcome was all-cause mortality at one year  
10 after presentation and the primary measure was proCNP concentration in plasma at  
11 admission in all patients and longitudinal measurements in a consecutive subgroup of  
12 287 patients. A reference population (n = 688) defined cut-off values of increased  
13 proCNP concentrations.

14 **Results:** In all patients, an increased proCNP concentration was associated with a  
15 higher all-cause mortality after one year (HR: 1.6 (1.1-2.4),  $P_{\text{logrank}} = .009$ ) including an  
16 interaction of sex ( $P = .03$ ). In separate sex-stratified analyses, female patients showed  
17 increased all-cause mortality (HR<sub>one year</sub>: 2.6 (1.5-4.6),  $P_{\text{logrank}} < .001$ ), whereas no  
18 differences were found in male patients (HR<sub>one year</sub>: 1.1 (.7-1.9),  $P_{\text{logrank}} = .66$ ). After  
19 adjusting for potential risk factors, we found increased proCNP concentrations  $\geq$  the  
20 median value to be independently associated with increased risk of mortality in female  
21 patients within one year (HR per 1 pmol/L increase: 1.04 (1.01-1.06),  $P = .007$ ).

1  
2  
3 1 Moreover, we found indications of sex differences in proCNP concentrations over time  
4  
5 2 (higher proCNP in males (4.4 (-.28 – 9.1) pmol/L, P= .07) and interaction of sex and  
6  
7 3 time (P= .13)), and that hypertension was independently associated with higher proCNP  
8  
9 4 (4.5 (.6-8.4) pmol/L, P= .03).

10  
11  
12  
13 5 **Conclusions:** In female but not male patients presenting with STEMI, high  
14  
15 6 concentrations of proCNP ( $\geq$  median) at admission independently indicate a higher risk  
16  
17 7 of all-cause mortality. The findings are remarkably specific for female patients,  
18  
19 8 suggesting a different vascular phenotype beyond traditional measures of coronary  
20  
21 9 artery flow compared to male patients.  
22  
23  
24  
25  
26  
27  
28  
29  
30  
31  
32  
33  
34  
35  
36  
37  
38  
39  
40  
41  
42  
43  
44  
45  
46  
47  
48  
49  
50  
51  
52  
53  
54  
55  
56  
57  
58  
59  
60

## 1 Strengths and limitations of this study

- 2 • The is the first study to investigate the prognostic potential of measurement of  
3 peptides derived from pro-C-type natriuretic peptide (proCNP) by using  
4 predefined sex- and age-specific cut-off values based on a reference population.
- 5 • As a novel approach, a large cohort of patients are examined during the acute  
6 phase of ST-elevation myocardial infarction with plasma sampling at admission  
7 and all-cause mortality within one year as main outcome.
- 8 • To clarify the temporal pattern of proCNP concentrations, longitudinal  
9 measurements during admission in a subgroup of the cohort are used to further  
10 examine sex differences and baseline associations.
- 11 • The sex-specific analyses are exploratory and the present report should be  
12 considered a hypothesis-generating study.
- 13 • As all-cause mortality within one year is the only available outcome measure,  
14 other clinical end-points and long-term follow-up is not investigated.

## 1 Introduction

2 Despite the structural resemblance to the cardiac hormones, atrial and B-type natriuretic  
3 peptides (ANP and BNP), C-type natriuretic peptide (CNP) differs functionally from the  
4 two other family members.[1] CNP is a paracrine/autocrine peptide expressed in many  
5 tissues,[2] including endothelial cells.[3] Experimental studies have shown that  
6 endothelial-derived CNP is locally involved in regulation of vascular tone[4,5] and  
7 angiogenesis.[6] Also, a recent preclinical investigation has suggested that CNP plays a  
8 key protective role in cardiac pathophysiology.[7]

9 Clinical reports on the general population as well as patients with heart disease have  
10 examined circulating proCNP-derived peptides as prognostic markers.[8–10] In patients  
11 presenting with acute coronary syndrome (ACS), high concentrations of amino-terminal  
12 proCNP (NT-proCNP) in plasma measured 4-6 weeks after the event were reported to  
13 be the only natriuretic peptide to independently predict cardiac readmission and death in  
14 the patients with unstable angina.[8] Taken together, experimental and epidemiological  
15 data suggest CNP to be an important regulator of cardiovascular function and that  
16 increased concentrations of proCNP-derived peptides in plasma of patients reflect an  
17 unfavorable cardiovascular condition as a compensatory response to cardiovascular  
18 disease. However, no previous large study has explored the prognostic value of  
19 measurement of proCNP-derived peptides in the acute phase of an ST-elevation  
20 myocardial infarction (STEMI).[11]

21 In this study, we measured concentrations of the precursor of C-type natriuretic  
22 peptides (proCNP) in plasma from a large cohort of patients presenting with STEMI,

1 where baseline blood samples were collected when patients were admitted (before  
2 coronary intervention). Previously, we have reported on this method for accurate  
3 quantification of “total” proCNP in plasma by a processing-independent  
4 radioimmunoassay.[12] We determined proCNP concentration as a predictor of all-  
5 cause mortality within one year and examined for potential sex-differences. Moreover,  
6 we investigated a large consecutive subgroup of patients with STEMI from the cohort  
7 with longitudinal plasma samples collected during the hospital admission to examine  
8 proCNP concentrations over time and further analyze baseline associations between  
9 proCNP concentrations and vascular diseases. Finally, we included a large sample of  
10 healthy individuals in order to, independently of the patient cohort, establish age- and  
11 sex-specific reference intervals for proCNP concentrations in plasma.

## 12 *Nomenclature*

13 ProCNP: In the present article, proCNP refers to a specific amino-acid sequence  
14 (human proCNP 11-27) within the prohormone sequence of CNP; the epitope of the  
15 antiserum of our radioimmunoassay. In this processing-independent methodology, we  
16 utilize this fragment after enzymatic cleavage in vitro as a proxy measure of all proforms  
17 released to plasma irrespective of prohormone post-translational processing.

18 ProCNP-derived peptides: Collective term for any fragment of the prohormone of CNP.

## 19 **Methods**

### 20 REFERENCE POPULATION

1  
2  
3 1 For establishment of reference intervals, we used plasma samples from the Nordic  
4  
5 2 Reference Interval Project Biobank and Database (NOBIDA), originally consisting of  
6  
7 3 3002 subjects.[13] A subgroup of 853 subjects from this population was randomly  
8  
9 4 selected with the aim to represent sex, age, and country of origin equally, as previously  
10  
11 5 described.[14]  
12  
13  
14

## 15 6 COHORT OF PATIENTS WITH STEMI

16  
17  
18 7 Patients with suspected STEMI were consecutively included from two Danish hospitals  
19  
20 8 over a period of one year (2015/2016) (Copenhagen University Hospital, Rigshospitalet  
21  
22 9 (RH), and Odense University Hospital (OUH)). The procedure of inclusion has been  
23  
24 10 described previously.[15] From this cohort of patients with suspected STEMI and triaged  
25  
26 11 for acute coronary angiography (CAG) (based on assessment of symptoms and the  
27  
28 12 individual electrocardiogram (ECG)), we only included patients with confirmed  
29  
30 13 STEMI.[16] All patients underwent CAG and baseline blood samples were obtained  
31  
32 14 immediately before CAG was performed (See further details on data collection including  
33  
34 15 blood sampling in the Supplemental Material).  
35  
36  
37  
38  
39

## 40 16 PATIENT AND PUBLIC INVOLVEMENT

41  
42  
43 17 Patients and/or the public were not involved in the design, or conduct, or reporting, or  
44  
45 18 dissemination plans of this research.  
46  
47

## 48 19 ETHICS

49  
50  
51  
52 20 Patients gave written informed consent. When patients were not able to provide this  
53  
54 21 (e.g. comatose cardiac arrest patients), consent was obtained by the patients' next of  
55  
56  
57  
58  
59  
60



1 kin and general practitioners in accordance with national legislation. The study was  
2 approved by the Local Committee on Health Research Ethics (Copenhagen) (Ref. H-2-  
3 2014-110).

#### 4 BIOCHEMICAL ANALYSES

5 Plasma proANP and proCNP concentrations were quantified by the previously reported  
6 processing-independent assay technology and procedures.[12,17,18] Information of  
7 other biochemical analyses can be found in the Supplemental Material.

#### 8 ALL-CAUSE MORTALITY

9 The Danish Civil Registration System was used for all-cause mortality assessment. All  
10 Danish citizens are recorded with a unique 10-digit civil registration number, and deaths  
11 are registered within 2 weeks. Initial follow-up began on the date of admission and  
12 continued until date of death, or October 30<sup>th</sup>, 2017.

#### 13 MAIN OUTCOMES

14 The primary outcome was one-year all-cause mortality. We tested 30-day all-cause  
15 mortality as a secondary outcome. We focused on sex-specific estimates as we found a  
16 statistical interaction of sex and proCNP concentrations on mortality.

#### 17 STUDY DESIGN

18 The study design is summarized in Figure 1.

#### 19 STATISTICS

##### 20 *Reference Population*

1  
2  
3 1 We divided the reference population into groups based on sex and age (<50 and ≥50  
4  
5 2 years) and used the RefVal software[19] to calculate 95% reference intervals based on  
6  
7 3 a non-parametric bootstrapping method. See Supplemental Table 1 for results on  
8  
9 4 reference intervals.

### 5 *STEMI Cohort*

6 Based on their respective sex- and age-specific reference interval from the reference  
7  
8 7 population, all STEMI patients were stratified according to a) increased proCNP  
9  
10 8 concentration (higher than the 95% reference interval), b) normal proCNP concentration  
11  
12 9 (within the 95% reference interval), and c) decreased proCNP concentration (lower than  
13  
14 10 the 95% reference interval). Dichotomous variables are presented as numbers (n) and  
15  
16 11 percentages (%). Continuous variables are presented as medians with 25<sup>th</sup>–75<sup>th</sup>  
17  
18 12 percentiles. Comparisons between groups were done using independent non-  
19  
20 13 parametric t-tests and Fisher's exact two-sided test. Spearman's correlation analyses  
21  
22 14 were used to assess the relationships between proCNP and other biochemical analytes.  
23  
24 15 Differences in median proCNP concentrations at different time intervals from onset of  
25  
26 16 symptoms to blood sample were assessed by Kruskal-Wallis tests (this time parameter  
27  
28 17 also reflects total ischemic time; see Supplemental Material). All-cause mortality after 30  
29  
30 18 days and one year was assessed in patients stratified into normal or increased proCNP  
31  
32 19 concentrations and depicted by Kaplan-Meier plots and then compared with the log-rank  
33  
34 20 test and estimates of hazard ratio including 95% confidence intervals. We performed a  
35  
36 21 statistic test of interaction between sex and groups of proCNP. To test the relation of  
37  
38 22 mortality and proCNP concentrations on a continuous scale, we performed cubic spline  
39  
40 23 plots with the density distribution and the logarithm of hazard ratios. We focused our

1 further mortality analyses on proCNP concentrations  $\geq$  median, where we observed an  
2 effect of increasing proCNP concentrations on mortality (patients were divided into  
3 groups of  $\geq$  vs.  $<$  median proCNP according to sex- and age-specific median proCNP  
4 concentrations of the reference population shown in the Supplemental Material). Thus,  
5 for patients with a baseline proCNP concentration  $\geq$  median, multivariable Cox  
6 proportional hazard models including proCNP, age, plasma creatinine, plasma proANP,  
7 time from onset of symptoms to blood sample, number of coronary vessels affected and  
8 tertiles of peak plasma troponin concentrations were constructed for mortality  
9 assessment. Both plasma proANP and creatinine were logarithmically transformed,  
10 where peak troponin T and troponin I were combined in one variable of tertiles  
11 (represented by values of one to three) as a proxy myocardial infarction size, before  
12 being entered into the model. For longitudinal analyses, we constructed four time  
13 points/intervals for statistical analyses (1: samples from admission; 2: 1 to 12 hours  
14 after admission; 3:  $>12$  to 24 hours after admission; 4:  $>24$  hours after admission). We  
15 used linear mixed models of unstructured co-variances to examine changes in  
16 concentrations and associations with co-variables over time. Statistical analyses were  
17 performed using RefVal software<sup>20</sup> for calculation of reference intervals, statistical  
18 software R version 3.6.1 (R Core Team, Vienna, Austria[20]) for linear mixed models  
19 (nlme package), and IBM SPSS Statistics 22 (SPSS Inc., Chicago, Illinois, United  
20 States) for other analyses. A *P*-value  $<.05$  was considered statistically significant.

## 21 **Results**

### 22 *Reference population*

1 We measured proCNP concentrations in available plasma from 688 subjects (358  
2 females; 330 males). From these measurements, 95% reference intervals for females  
3 vs. males and < vs.  $\geq 50$  years were calculated (see results in the Supplemental Table  
4 1).

### 5 *STEMI Cohort*

6 From the cohort of 2247 patients with suspected STEMI, 1760 patients (460  
7 females and 1290 males) with verified STEMI and available plasma were included in  
8 our study (see a flowchart of the inclusion in Supplemental Figure 1 and the relative  
9 frequencies of measured proCNP concentrations in Supplemental Figure 2). When  
10 compared to the sex- and age-specific reference intervals, a total of 283 (16.1%) of the  
11 patients had an increased proCNP concentration; no difference in sex-specific  
12 proportions was observed ( $P = .42$ ).

### 13 *Baseline analyses*

14 Table 1 shows the baseline characteristics and follow-up in patient groups defined by  
15 normal or increased proCNP concentrations. Five patients (one male and four females)  
16 displayed decreased proCNP concentrations and were not included in Table 1. Missing  
17 individual information on each variable in each group was between .1% and 4.4%,  
18 except for age, sex, mortality, cardiogenic shock, cardiac arrest coma, time from onset  
19 of symptoms to blood sample, and Thrombolysis in Myocardial Infarction (TIMI) grade  
20 flow, where information from all patients was available (see Supplemental Table 2 for  
21 results on culprit vessel, number of coronary vessels affected and TIMI grade flow).  
22 Female patients with increased proCNP concentrations at admission had a higher

1 prevalence of hypertension ( $P = .003$ ), diabetes mellitus ( $P = .022$ ), peripheral artery  
2 disease ( $P = .002$ ), and chronic kidney disease (CKD) ( $P < .001$ ), whereas male  
3 patients had higher prevalence of hypertension ( $P = .004$ ), stroke ( $P = .012$ ), and CKD  
4 ( $P < .001$ ). Increased proCNP was associated with higher concentrations of proANP ( $P$   
5 = .019) and soluble thrombomodulin (sTM) ( $P = .001$ ) in female patients and with higher  
6 concentrations of creatinine ( $P < .001$ ), syndecan-1 ( $P = .019$ ), and sTM ( $P = .003$ ) in  
7 male patients. Lastly, we found a higher one-year mortality rate ( $P = .001$ ) and  
8 prevalence of cardiogenic shock development ( $P = .013$ ) in female patients with  
9 increased proCNP concentrations, whereas no differences were found in male patients.  
10 For biochemical markers with positive associations to proCNP, we performed  
11 Spearman's correlation analyses (see the Supplemental Material for results). For results  
12 on median proCNP concentrations in groups of time from onset of symptoms to blood  
13 sample, see Supplemental Material including Supplemental Figure 3).

#### 14 *Mortality analyses*

15 Thirty-days and one-year all-cause mortality plots of normal and increased proCNP  
16 concentrations of all patients and stratified by sex are depicted in Figure 2. Different  
17 mortality rates were found for all patients at both time points ( $HR_{30\text{ days}} = 1.6$  (1.0-2.6),  
18  $P_{logrank} = .03$  and  $HR_{one-year} = 1.6$  (1.1-2.4),  $P_{logrank} = .009$ ). However, we found an  
19 interaction of sex and groups of proCNP ( $P = .03$ ). In sex-specific estimates, only  
20 female patients showed different mortality rates (females<sub>30 days</sub>:  $HR = 2.8$  (1.4-5.6),  
21  $P_{logrank} = .002$ , females<sub>one-year</sub>:  $HR = 2.6$  (1.5-4.6),  $P_{logrank} < .001$ , males<sub>30 days</sub>:  $HR = 1.1$   
22 (0.6-2.1),  $P_{logrank} = .87$ , and males<sub>one-year</sub>:  $HR = 1.1$  (.7-1.9),  $P_{logrank} = .66$ ). In cubic spline  
23 plots, we observed an effect of increasing proCNP as a continuous variable on mortality

1 from median concentrations in both sexes. We therefore focused on this upper range of  
2 proCNP concentrations in Cox regression analyses (see Supplemental Figure 4). In a  
3 univariate Cox proportional hazard model, we found an elevated hazard ratio (HR) of  
4 all-cause mortality with increases of plasma proCNP for both sexes (results shown in  
5 Table 2). When including age and plasma creatinine in a multivariable model (Model 1),  
6 proCNP was independently associated with mortality in female but not in male patients  
7 (see Table 2): HR (95% CI) for female patients was 1.04 (1.01-1.07) ( $P = .008$ ) for 30-  
8 day and 1.03 (1.01-1.06) ( $P = .010$ ) for one-year mortality, whereas HR was 1.00 for  
9 both all patients and male patients at both time points (see Table 2). In a model where  
10 proANP, tertiles of peak troponins, number of vessels affected, and time from onset of  
11 symptoms to admission were also added (Model 2), risk estimates of proCNP (per one  
12 pmol/L increase) were: HR (95% CI) = 1.04 (1.01-1.07),  $P = .016$  for 30-day mortality,  
13 and HR (95% CI) = 1.04 (1.01-1.06),  $P = .007$  for one-year mortality.

#### 14 *Longitudinal analyses*

15 To examine proCNP concentrations over time during a STEMI and further test the  
16 baseline associations of vascular disease and increased proCNP, we used a set of  
17 longitudinal plasma samples from a consecutive subgroup of the cohort consisting of  
18 287 STEMI patients (64 females and 223 males). Results are shown in Figure 3 and  
19 Table 3. An overall decrease in proCNP concentration was estimated to be 3.8 pmol/L  
20 (~10%) ( $P = .001$ ) from admission to >24 hours. In a multivariate model including sex,  
21 age, and chronic diseases (Model 3), CKD and hypertension were independently  
22 associated with higher concentrations of proCNP ( $P < .001$  and  $P = .03$ , respectively),  
23 whereas time and age were not independently associated with changes in proCNP.

1  
2  
3 1 Also, both Model 2 and 3 implied a positive association of proCNP concentration and  
4  
5 2 male sex, and an interaction of time and sex; however, the statistical uncertainty of  
6  
7 3 these estimates was substantial ( $P = .07$  and  $P = .13$ , respectively). Figure 3 shows  
8  
9 4 proCNP concentrations over time in overall and sex-specific graphs including graphs of  
10  
11 5 CKD and hypertension (see the Supplemental Material including Supplemental Table 3  
12  
13 6 and Supplemental Figure 5 for further results of longitudinal measurements).  
14  
15  
16  
17

## 18 7 **Discussion**

19  
20  
21 8 In this study, we report on a marked sex-specific prognostic information profile for  
22  
23 9 proCNP measurement in patients presenting with a STEMI. A major advantage of our  
24  
25 10 present approach comes from an independent establishment of a sex-specific proCNP  
26  
27 11 reference interval prior to patient measurement. This allowed us to perform clinically  
28  
29 12 meaningful divisions of normal, decreased, or increased proCNP concentrations in  
30  
31 13 plasma specific to sex, rather than testing differences only within the patient cohort as a  
32  
33 14 whole (see the Supplemental Material for discussion of age groups).  
34  
35  
36  
37

38 15 In this cohort of consecutive patients with a verified STEMI, we show that 16.1%  
39  
40 16 have increased concentrations of proCNP during the early phase of the myocardial  
41  
42 17 infarction compared with the sex- and age-specific intervals. Interestingly, besides  
43  
44 18 higher prevalence of CKD, we found a markedly higher prevalence of cardiovascular  
45  
46 19 disease including hypertension in both sexes; diabetes mellitus and peripheral artery  
47  
48 20 disease for female patients; and stroke for males among patients with increased  
49  
50 21 proCNP. Our longitudinal analyses of a subgroup of the STEMI patients corroborates  
51  
52 22 that the association to both CKD and hypertension is consistent even over time and is  
53  
54  
55  
56  
57  
58  
59  
60

1 independent of sex, age, and other cardiovascular diseases. A putative explanation for  
2 the linkage of hypertension and increased proCNP concentrations is the upregulation of  
3 CNP expression by vascular shear stress.[21,22] The positive association of proCNP  
4 and a vascular marker, sTM, for both sexes also support the relation of circulating  
5 proCNP with vascular stress. In contrast, the baseline associations of increased  
6 proCNP concentrations and diabetes, peripheral artery disease and stroke, respectively,  
7 are not statistically independent in longitudinal analyses. However, given the sex-  
8 specific pattern in the baseline findings and the limited number of patients with the  
9 respective diseases in longitudinal analyses, the results may be too preliminary to  
10 sufficiently conclude on the potential associations to diabetes, peripheral artery disease,  
11 and stroke. Also, the statistical uncertainty of the suggested effect of sex and interaction  
12 of sex and time in longitudinal analyses calls for a cautious interpretation (see the  
13 Supplemental Material for further discussion of longitudinal analyses).

14 The risks of death within 30 days and one year were higher for female patients  
15 with increased proCNP concentrations – but not for male patients. This marked sex-  
16 specific association was confirmed when the mortality rate was analyzed by increases  
17 of proCNP  $\geq$  median, where proCNP proved to be an independent predictor in a model  
18 (Model 1 in Table 2) including two additional variables, age and plasma creatinine,  
19 which have previously established associations with NT-proCNP in plasma.[23] To  
20 further test the prognostic potential of proCNP, we added plasma proANP, tertiles of  
21 peak troponins, number of vessels affected, and time from onset of symptoms to  
22 admission into a multivariable model (Model 2). In this model, increases of proCNP  
23 were still independently associated with the risk of death, and the estimates were of



1 similar size at both time points. Recent data on patients with STEMI found no  
2 independent prognostic value on mortality rate for NT-proCNP concentrations.[8]  
3 However, that report differed from ours in several aspects including radioimmunoassay  
4 principle and duration of follow-up, and, importantly, plasma was sampled 4-6 weeks  
5 after admission in contrast to our real-time STEMI investigation. These differences  
6 make a direct comparison difficult.

7 Our results firmly suggest a sex-specific association with survival, where  
8 increased proCNP concentrations indicate a poorer prognosis in female patients.  
9 Previously, studies have shown that CNP acts as a more potent vasodilator in female  
10 porcine arteries[24] and that the female sex hormone estradiol upregulates the  
11 expression of CNP in vascular endothelial cells.[25] Furthermore, recent preclinical  
12 reports have convincingly pointed to a pivotal role of CNP and its receptors in the  
13 regulation of the microcirculation[5] and in cardiac homeostasis.[26] Taken together,  
14 these previous findings suggest that the CNP system is a critical modulator of vascular  
15 integrity and function including a more pronounced vasodilatory capacity in females that  
16 may be provided by female sex hormones. Clinical evidence shows that females display  
17 a sharp rise in the incidence of cardiovascular disease after menopause and that  
18 changes in sex hormones by complex mechanisms play a key role in the loss of  
19 vasoprotection.[27,28] Notably, postmenopausal females are at higher risk of coronary  
20 microvascular dysfunction and HFpEF compared with their male counterparts,[29] and  
21 high concentrations of NT-proCNP have previously been independently linked to an  
22 adverse outcome in patients with HFpEF.[9] In this perspective, we speculate that our  
23 observed sex-specific effect of increased proCNP concentrations in plasma of patients

1  
2  
3 1 with STEMI partly reflects ongoing vascular dysfunction in females in particular and,  
4  
5 2 hence, represents an independent signal of poor cardiovascular prognosis. However,  
6  
7 3 there is a need for translational research to elucidate this association between  
8  
9 4 increased proCNP in females with vascular complications and increased mortality rate.  
10  
11 5 Furthermore, there is a paucity of reports examining a potential racial impact on  
12  
13 6 concentrations of circulating proCNP-derived peptides. As the majority of Danish and  
14  
15 7 Scandinavian population are Caucasian, it remains to be investigated whether our  
16  
17 8 results can be extrapolated to other populations.  
18  
19  
20  
21

### 22 9 *Limitations*

23  
24  
25 10 While the number of patients with STEMI in the cohort is high, the follow-up period is  
26  
27 11 relatively short. We examined only all-cause mortality as outcome in our follow-up  
28  
29 12 multivariable Cox regression analyses, and other clinical endpoints, e.g., cardiac  
30  
31 13 readmission, were not tested. Hence, the number of events limits the number of  
32  
33 14 possible covariates in the multivariable Cox regression analyses (Model 3), and sex-  
34  
35 15 specific estimates of 30-day mortality in this model should be interpreted cautiously.  
36  
37 16 Moreover, this study focused on increased proCNP and the upper range of proCNP  
38  
39 17 concentrations in plasma, whereas associations of decreased proCNP concentrations  
40  
41 18 were not investigated. With regard to measurement of troponins in plasma, two different  
42  
43 19 analytes (TnT and TnI) were measured at the two hospitals of inclusion. Thus, a  
44  
45 20 combined variable of tertiles of peak troponins (discrete values of one to three) was  
46  
47 21 included in the multivariable models with less quantitative information than the  
48  
49 22 measured concentrations. Baseline biochemical analyses were performed on arterial  
50  
51 23 plasma, whereas venous plasma was used from the reference population and in  
52  
53  
54  
55  
56  
57  
58  
59  
60

1  
2  
3 1 repeated measurements. A previous report has shown slightly lower plasma  
4  
5 2 concentrations of NT-proCNP in arterial compared with venous plasma.[30] Thus, in  
6  
7 3 theory, our approach will underestimate the proportion of STEMI patients with increased  
8  
9 4 proCNP concentration and the initial longitudinal decrease in proCNP concentration  
10  
11 5 from baseline to the second time point (0 to 1-12 hours).  
12  
13  
14  
15  
16  
17  
18  
19  
20  
21  
22  
23  
24  
25  
26  
27  
28  
29  
30  
31  
32  
33  
34  
35  
36  
37  
38  
39  
40  
41  
42  
43  
44  
45  
46  
47  
48  
49  
50  
51  
52  
53  
54  
55  
56  
57  
58  
59  
60

## 1 **Conclusions**

2 We show here that increased proCNP concentrations in plasma from patients  
3 presenting with STEMI are associated with a higher all-cause mortality rate within one  
4 year among female patients with STEMI, whereas male patients display no such  
5 pattern. Moreover, we report that an increase of proCNP in the upper range of plasma  
6 concentrations ( $\geq$ median) in female patients is an independent prognostic marker of  
7 mortality at both 30 days and one year. The findings are remarkably specific for female  
8 patients, suggesting a different vascular phenotype beyond traditional measures of  
9 coronary artery flow compared to male patients.

## 1 **Acknowledgements**

2 We are grateful to laboratory technicians Marie Ziebell Severinsen and Anne Truesen  
3 Asanovski for their expertise regarding proANP and proCNP measurement in plasma.

## 4 **Contributors**

5 Designed the study: PDM, MF, CH, JPG. Designed and conducted the STEMI cohort  
6 study: MF, OKLH, LH, JEM, CH. Undertook biochemical measurements: PDM, SRO,  
7 PIJ, JPG. Performed the data analysis: PDM, MF, TCRP. Wrote the manuscript draft:  
8 PDM. Revised the paper based on intellectual contribution: PDM, MF, OKLH, LH, JEM,  
9 PIJ, SRO, TCRP, CH, JPG.

## 10 **Funding**

11 Research grants from Rigshospitalet.

## 12 **Competing interests**

13 None to report.

## 14 **Patient and public involvement**

15 Patients and/or the public were not involved in the design, or conduct, or reporting, or  
16 dissemination plans of this research.

## 17 **Ethics approval**

18 The study was approved by the local ethics committee (Copenhagen) (Ref. H-2-2014-  
19 110).

1  
2  
3  
4  
5  
6  
7  
8  
9  
10  
11  
12  
13  
14  
15  
16  
17  
18  
19  
20  
21  
22  
23  
24  
25  
26  
27  
28  
29  
30  
31  
32  
33  
34  
35  
36  
37  
38  
39  
40  
41  
42  
43  
44  
45  
46  
47  
48  
49  
50  
51  
52  
53  
54  
55  
56  
57  
58  
59  
60

1 **Data availability statement**

2 Data are available upon reasonable request (email: JPG@dadlnet.dk).

For peer review only

## 1      1      **References**

- 2      1      Goetze JP, Bruneau BG, Ramos HR, *et al.* Cardiac natriuretic peptides. *Nat. Rev.*  
3      2      *Cardiol.* 2020;**17**:698–717. doi:10.1038/s41569-020-0381-0
- 4      2      Sellitti DF, Koles N, Mendona MC. Regulation of C-type natriuretic peptide  
5      3      expression. *Peptides.* 2011;**32**:1964–71. doi:10.1016/j.peptides.2011.07.013
- 6      3      Stingo AJ, Clavell AL, Heublein DM, *et al.* Presence of C-type natriuretic peptide  
7      4      in cultured human endothelial cells and plasma. *Am J Physiol - Hear Circ Physiol*  
8      5      1992;**263**:H1318-21. doi:10.1152/ajpheart.1992.263.4.h1318
- 9      4      Nakao K, Kuwahara K, Nishikimi T, *et al.* Endothelium-Derived C-Type Natriuretic  
10      6      Peptide Contributes to Blood Pressure Regulation by Maintaining Endothelial  
11      7      Integrity. *Hypertension* 2017;**69**:286–96.  
12      8      doi:10.1161/HYPERTENSIONAHA.116.08219
- 13      5      Špiranec K, Chen W, Werner F, *et al.* Endothelial C-type natriuretic peptide acts  
14      9      on pericytes to regulate microcirculatory flow and blood pressure. *Circulation*  
15      10      2018;**138**:494–508. doi:10.1161/CIRCULATIONAHA.117.033383
- 16      6      Bubb KJ, Aubdool AA, Moyes AJ, *et al.* Endothelial C-Type Natriuretic Peptide Is  
17      11      a Critical Regulator of Angiogenesis and Vascular Remodeling. *Circulation*  
18      12      2019;**139**:1612–28. doi:10.1161/CIRCULATIONAHA.118.036344
- 19      7      Parmar KM, Larman HB, Dai G, *et al.* Integration of flow-dependent endothelial  
20      13      phenotypes by Kruppel-like factor 2. *J Clin Invest* 2006;**116**:49–58.  
21      14      doi:10.1172/JCI24787

- 1  
2  
3 1 8 Prickett TCR, Doughty RN, Troughton RW, *et al.* C-type natriuretic peptides in  
4 coronary disease. *Clin Chem* 2017;**63**:316–24.  
5  
6 2  
7  
8 3 doi:10.1373/clinchem.2016.257816  
9  
10  
11 4 9 Lok DJ, Klip IJT, Voors AA, *et al.* Prognostic value of N-terminal pro C-type  
12 natriuretic peptide in heart failure patients with preserved and reduced ejection  
13 fraction. *Eur J Heart Fail* 2014;**16**:958–66. doi:10.1002/ejhf.140  
14  
15  
16 6  
17  
18 7 10 Sangaralingham SJ, McKie PM, Ichiki T, *et al.* Circulating C-Type Natriuretic  
19 Peptide and Its Relationship to Cardiovascular Disease in the General Population.  
20  
21  
22 8  
23 9 *Hypertension* 2015;**65**:1187–94. doi:10.1161/HYPERTENSIONAHA.115.05366  
24  
25  
26 10 11 Pemberton CJ, Siriwardena M, Kleffmann T, *et al.* C-type natriuretic peptide  
27 (CNP) signal peptide fragments are present in the human circulation. *Biochem*  
28  
29 11  
30  
31 12 *Biophys Res Commun* 2014;**449**:301–6. doi:10.1016/j.bbrc.2014.05.020  
32  
33  
34 13 12 Lippert SK, Rehfeld JF, Goetze JP. Processing-independent analysis for pro-C-  
35 type natriuretic peptide. *J Immunol Methods* 2010;**362**:32–7.  
36  
37 14  
38  
39 15 doi:10.1016/j.jim.2010.08.003  
40  
41  
42 16 13 Felding P, Rustad P, Mårtensson A, *et al.* Reference individuals, blood collection,  
43 treatment of samples and descriptive data from the questionnaire in the Nordic  
44 Reference Interval Project 2000. *Scand J Clin Lab Invest* 2004;**64**:327–42.  
45  
46 18  
47  
48 19 doi:10.1080/00365510410006630  
49  
50  
51 20 14 Mark PD, Hunter I, Terzic D, *et al.* Processing-independent proANP measurement  
52 for low concentrations in plasma: Reference intervals and effect of body mass  
53  
54  
55  
56  
57  
58  
59  
60



- 1  
2  
3 1 index and plasma glucose. *Clin Chem Lab Med* 2017;**56**:132–7.  
4  
5 2 doi:10.1515/cclm-2017-0309  
6  
7  
8 3 15 Obling L, Frydland M, Hansen R, *et al*. Risk factors of late cardiogenic shock and  
9 mortality in ST-segment elevation myocardial infarction patients. *Eur Hear journal*  
10  
11 4 *Acute Cardiovasc care* 2018;**7**:7–15. doi:10.1177/2048872617706503  
12  
13 5  
14  
15  
16 6 16 Thygesen K, Alpert JS, Jaffe AS, *et al*. Third universal definition of myocardial  
17 infarction. *Circulation* 2012;**126**:2020–35. doi:10.1161/CIR.0b013e31826e1058  
18  
19 7  
20  
21  
22 8 17 Rehfeld J, Goetze J. The Posttranslational Phase of Gene Expression: New  
23 Possibilities in Molecular Diagnosis. *Curr Mol Med* 2005;**3**:25–38.  
24  
25 9  
26 10 doi:10.2174/1566524033361717  
27  
28  
29 11 18 Hunter I, Rehfeld JF, Goetze JP. Measurement of the total proANP product in  
30 mammals by processing independent analysis. *J Immunol Methods*  
31  
32 12 2011;**370**:104–10. doi:10.1016/j.jim.2011.06.005  
33  
34 13  
35  
36  
37 14 19 Solberg HE. The IFCC recommendation on estimation of reference intervals. The  
38 RefVal program. *Clin Chem Lab Med* 2004;**42**:710–4.  
39  
40 15  
41 16 doi:10.1515/CCLM.2004.121  
42  
43  
44  
45 17 20 3.5.1. RDCT. A Language and Environment for Statistical Computing. *R Found*  
46 *Stat Comput* 2018;**2**:<https://www.R-project.org>.<http://www.r-project.org>  
47  
48 18  
49  
50 19 21 Chun TH, Itoh H, Ogawa Y, *et al*. Shear stress augments expression of C-type  
51 natriuretic peptide and adrenomedullin. *Hypertension* 1997;**29**:1296–302.  
52  
53 20  
54  
55 21 doi:10.1161/01.HYP.29.6.1296  
56  
57  
58  
59  
60

- 1  
2  
3 1 22 Zhang Z, Xiao Z, Diamond SL. Shear Stress Induction of C-type Natriuretic  
4  
5 2 Peptide (CNP) in Endothelial Cells is Independent of NO Autocrine Signaling. *Ann*  
6  
7 *Biomed Eng* 1999;**27**:419–26. doi:10.1114/1.203  
8  
9  
10  
11 4 23 Prickett TCR, Olney RC, Cameron VA, *et al.* Impact of age, phenotype and  
12  
13 5 cardio-renal function on plasma C-type and B-type natriuretic peptide forms in an  
14  
15 6 adult population. *Clin Endocrinol (Oxf)* 2013;**78**:783–9. doi:10.1111/cen.12035  
16  
17  
18 7 24 Barber DA, Burnett JC, Fitzpatrick LA, *et al.* Gender and relaxation to C-type  
19  
20 8 natriuretic peptide in porcine coronary arteries. *J Cardiovasc Pharmacol*  
21  
22 9 1998;**32**:5–11. doi:10.1097/00005344-199807000-00002  
23  
24  
25  
26 10 25 Prickett TCR, Barrell GK, Wellby M, *et al.* Effect of sex steroids on plasma C-type  
27  
28 11 natriuretic peptide forms: Stimulation by oestradiol in lambs and adult sheep. *J*  
29  
30 12 *Endocrinol* 2008;**199**:481–7. doi:10.1677/JOE-08-0267  
31  
32  
33  
34 13 26 Moyes AJ, Chu SM, Aubdool AA, *et al.* C-type natriuretic peptide co-ordinates  
35  
36 14 cardiac structure and function. *Eur Heart J* 2020;**41**:1006–20.  
37  
38 15 doi:10.1093/eurheartj/ehz093  
39  
40  
41  
42 16 27 Vitale C, Mendelsohn ME, Rosano GMC. Gender differences in the  
43  
44 17 cardiovascular effect of sex hormones. *Nat Rev Cardiol* 2009;**6**:532–42.  
45  
46 18 doi:10.1038/nrcardio.2009.105  
47  
48  
49  
50 19 28 Mendelsohn ME, Karas RH. Molecular and cellular basis of cardiovascular gender  
51  
52 20 differences. *Science (80- )* 2005;**308**:1583–7. doi:10.1126/science.1112062  
53  
54  
55 21 29 Den Ruijter HM, Haitjema S, Asselbergs FW, *et al.* Sex matters to the heart: A  
56  
57  
58  
59  
60

1  
2  
3 1 special issue dedicated to the impact of sex related differences of cardiovascular  
4  
5 2 diseases. *Atherosclerosis* 2015;**241**:205–7.

6  
7  
8 3 doi:10.1016/j.atherosclerosis.2015.05.003

9  
10  
11 4 30 Palmer SC, Prickett TCR, Espiner EA, *et al.* Regional release and clearance of C-  
12  
13 5 type natriuretic peptides in the human circulation and relation to cardiac function.

14  
15 6 *Hypertension* 2009;**54**:612–8. doi:10.1161/HYPERTENSIONAHA.109.135608  
16  
17  
18  
19  
20  
21  
22  
23  
24  
25  
26  
27  
28  
29  
30  
31  
32  
33  
34  
35  
36  
37  
38  
39  
40  
41  
42  
43  
44  
45  
46  
47  
48  
49  
50  
51  
52  
53  
54  
55  
56  
57  
58  
59  
60

**Table 1. Sex-specific characteristics, medical history, and biochemical results in groups of proCNP concentrations in the STEMI-cohort.**

|                                                     | All patients (n = 1755) |                    |         | Females (n = 466)  |                    |         | Males (n = 1289)   |                    |         |
|-----------------------------------------------------|-------------------------|--------------------|---------|--------------------|--------------------|---------|--------------------|--------------------|---------|
|                                                     | Normal proCNP           | Increased proCNP   | P Value | Normal proCNP      | Increased proCNP   | P Value | Normal proCNP      | Increased proCNP   | P Value |
| <b>Number, n (%)</b>                                | 1472 (83.6)             | 283 (16.1)         | -       | 385 (81.9)         | 81 (17.2)          | -       | 1087 (84.2)        | 202 (15.6)         | -       |
| <b>Age, years</b>                                   | 63 (54-72)              | 66 (56-76)         | .046    | 67 (56-77)         | 72 (60-80)         | .16     | 62 (53-70)         | 64 (55-74)         | .21     |
| <b>Males, n (%)</b>                                 | 1087 (73.8)             | 202 (71.4)         | .42     | -                  | -                  | -       | -                  | -                  | -       |
| <b>Height, cm</b>                                   | -                       | -                  | -       | 165 (160-169)      | 164 (160-168)      | .13     | 178 (173-182)      | 178 (174-183)      | .87     |
| <b>BMI, kg/m<sup>2</sup></b>                        | 26.3 (24.1-29.3)        | 26.3 (23.8-30.1)   | .96     | 25.4 (20.0-29.1)   | 25.7 (22.5-31.2)   | .61     | 26.5 (24.5-29.3)   | 26.5 (24.2-29.9)   | .76     |
| <b>Smoking, n (%)</b>                               | 1045 (73.3)             | 203 (74.9)         | .60     | 250 (68.1)         | 54 (70.1)          | .79     | 795 (75.1)         | 149 (76.8)         | .65     |
| <b>Time from symptom to blood sample, min</b>       | 190 (128-376)           | 178 (125-292)      | .34     | 210 (136-460)      | 216 (141-349)      | >.99    | 185 (125-356)      | 167 (123-271)      | .18     |
| <b>LVEF, %</b>                                      | 45 (40-55)              | 45 (35-55)         | .33     | 50 (40-55)         | 45 (35-55)         | .62     | 45 (40-55)         | 45 (36-55)         | .36     |
| <b>Medical history, n (%)</b>                       |                         |                    |         |                    |                    |         |                    |                    |         |
| <b>Hypertension</b>                                 | 612 (42.6)              | 156 (56.1)         | <.001   | 177 (46.9)         | 52 (65.8)          | .003    | 435 (41.0)         | 104 (52.3)         | .004    |
| <b>Diabetes mellitus</b>                            | 177 (12.3)              | 51 (18.3)          | .009    | 47 (12.5)          | 18 (22.2)          | .022    | 130 (12.2)         | 33 (16.5)          | .11     |
| <b>Peripheral artery disease</b>                    | 72 (5.0)                | 24 (8.5)           | .023    | 15 (4.0)           | 11 (13.6)          | .002    | 57 (5.3)           | 13 (6.4)           | .50     |
| <b>Stroke</b>                                       | 91 (6.3)                | 30 (10.6)          | .015    | 30 (7.9)           | 8 (9.9)            | .51     | 61 (5.7)           | 22 (10.9)          | .012    |
| <b>Chronic kidney disease</b>                       | 41 (2.8)                | 40 (14.1)          | <.001   | 10 (2.6)           | 11 (13.6)          | <.001   | 31 (2.9)           | 29 (14.4)          | <.001   |
| <b>Ischemic heart disease</b>                       | 218 (14.8)              | 43 (16.3)          | .53     | 44 (11.5)          | 10 (12.3)          | .85     | 174 (16.0)         | 36 (17.9)          | .53     |
| <b>Heart failure</b>                                | 38 (2.6)                | 13 (4.6)           | .079    | 6 (1.6)            | 3 (3.7)            | .19     | 32 (2.9)           | 10 (5.0)           | .13     |
| <b>Biochemical analyses</b>                         |                         |                    |         |                    |                    |         |                    |                    |         |
| <b>Acute Troponin I, ng/L</b>                       | 220 (53-1576)           | 323 (86-887)       | .52     | 293 (54-3220)      | 813 (176-1814)     | .57     | 188 (53-1481)      | 211 (58-844)       | .99     |
| <b>Acute Troponin T, ng/L</b>                       | 1610 (329-3940)         | 953 (222-3370)     | .018    | 1520 (394-3540)    | 571 (166-2753)     | .076    | 1640 (287-4058)    | 1250 (242-3710)    | .24     |
| <b>Peak Troponin I, ng/L</b>                        | 20264 (3413-50000)      | 19981 (5508-50000) | .91     | 12970 (2734-41856) | 11721 (4014-50000) | .98     | 24507 (3654-50000) | 20575 (5771-47927) | .56     |
| <b>Peak Troponin T, ng/L</b>                        | 3110 (1230-6920)        | 2430 (880-8060)    | .23     | 2520 (995-5930)    | 2290 (614-8123)    | .55     | 3380 (1400-7603)   | 2860 (923-8075)    | .23     |
| <b>Plasma creatinine, μmol/L</b>                    | 81 (70-96)              | 95 (80-126)        | <.001   | 69 (59-84)         | 83 (63-113)        | .072    | 85 (74-98)         | 97 (86-131)        | <.001   |
| <b>Estimated glomerular filtration rate, mL/min</b> | 83 (67-95)              | 70 (45-85)         | <.001   | 79 (61-93)         | 61 (39-86)         | .095    | 85 (69-96)         | 72 (49-86)         | <.001   |

|                                                   |                   |                    |       |                   |                   |      |                   |                    |      |
|---------------------------------------------------|-------------------|--------------------|-------|-------------------|-------------------|------|-------------------|--------------------|------|
| <b>proANP, pmol/L</b>                             | 822 (515-1315)    | 1005 (558-1742)    | .005  | 978 (664-1504)    | 1382 (747-2064)   | .019 | 758 (488-1241)    | 899 (508-1499)     | .10  |
| <b>hs-CRP <math>\geq</math>2 mg/L, n (%) *, †</b> | 474 (65.0)        | 111 (63.1)         | .66   | 117 (67.2)        | 34 (68.0)         | >.99 | 357 (64.3)        | 77 (61.1)          | .54  |
| <b>ST2, ng/ml</b>                                 | 40.0 (29.1-56.8)  | 39.8 (30.4-59.7)   | .95   | 35.3 (27.0-55.0)  | 34.8 (26.2-58.4)  | .92  | 41.5 (30.2-57.5)  | 41.5 (32.1-60.0)   | .95  |
| <b>Syndecan-1, ng/ml<sup>b</sup></b>              | 92.3 (64.2-137.0) | 103.5 (69.4-154.0) | .001  | 82.2 (52.5-137.3) | 99.3 (61.8-140.8) | .21  | 94.4 (68.1-137.0) | 113.5 (71.6-155.1) | .019 |
| <b>Soluble thrombomodulin, ng/ml<sup>b</sup></b>  | 7.35 (5.98-8.91)  | 8.49 (6.67-10.86)  | <.001 | 6.71 (5.42-8.15)  | 8.05 (6.16-10.80) | .001 | 7.57 (6.19-9.18)  | 8.53 (6.70-10.87)  | .003 |
| <b>Follow-up, n (%)</b>                           |                   |                    |       |                   |                   |      |                   |                    |      |
| <b>Number of deaths within one year</b>           | 114 (7.7%)        | 35 (12.4%)         | .014  | 37 (9.6%)         | 19 (23.5%)        | .001 | 77 (7.1%)         | 16 (7.9%)          | .66  |
| <b>Cardiogenic shock</b>                          | 122 (8.3%)        | 34 (12.0%)         | .052  | 32 (8.3%)         | 15 (18.5%)        | .013 | 90 (8.3%)         | 19 (9.4%)          | .58  |
| <b>Cardiac arrest coma</b>                        | 66 (4.5%)         | 19 (6.7%)          | .13   | 14 (3.6%)         | 3 (3.7%)          | >.99 | 52 (4.8%)         | 16 (7.9%)          | .084 |

Continuous variables are given in median (inter-quartile range).

\* Only patients with a time from onset of symptoms to CAG of <6 hours were included.

† Only patients admitted at RH (313 females and 873 males) were included.

**Table 2. Cox regression analyses of all-cause mortality.**

|                                                                 |                  | Univariate |           |         | Model 1* |           |         | Model 2 † |           |         |
|-----------------------------------------------------------------|------------------|------------|-----------|---------|----------|-----------|---------|-----------|-----------|---------|
|                                                                 |                  | HR         | 95% CI    | P Value | HR       | 95% CI    | P Value | HR        | 95% CI    | P Value |
| <b>All patients with proCNP ≥ median (n = 928) are included</b> |                  |            |           |         |          |           |         |           |           |         |
| <b>ProCNP (per 1 pmol/L increase)</b>                           | 30-day mortality | 1.02       | 1.01-1.03 | <.001   | 1.00     | 0.99-1.01 | .89     | 1.00      | 0.99-1.02 | .57     |
|                                                                 | 1-year mortality | 1.02       | 1.01-1.03 | <.001   | 1.00     | 0.99-1.01 | .89     | 1.00      | 0.99-1.02 | .58     |
| <b>Females with proCNP ≥ median (n=260) are included</b>        |                  |            |           |         |          |           |         |           |           |         |
| <b>ProCNP (per 1 pmol/L increase)</b>                           | 30-day mortality | 1.05       | 1.02-1.07 | <.001   | 1.04     | 1.01-1.07 | .008    | 1.04      | 1.01-1.07 | .016    |
|                                                                 | 1-year mortality | 1.04       | 1.02-1.07 | <.001   | 1.03     | 1.01-1.06 | .010    | 1.04      | 1.01-1.06 | .007    |
| <b>Males with a proCNP ≥ median (n = 668) are included</b>      |                  |            |           |         |          |           |         |           |           |         |
| <b>ProCNP (per 1 pmol/L increase)</b>                           | 30-day mortality | 1.02       | 1.01-1.03 | .001    | 1.00     | 0.98-1.02 | .86     | 1.00      | 0.98-1.02 | .92     |
|                                                                 | 1-year mortality | 1.02       | 1.01-1.03 | <.001   | 1.00     | 0.98-1.01 | .72     | 1.00      | 0.98-1.02 | .86     |

All patients with a proCNP ≥ median of the sex- and age-specific reference interval are included in the analyses to test the predictive value of proCNP as a continuous variable (per 1 pmol/L increase).

\* Multivariable model with age and plasma creatinine included as co-variables.

† Multivariable model with age, plasma creatinine, proANP, tertiles of peak troponins, number of vessels affected, and time from onset of symptoms to blood sample included as co-variables.

1  
2  
3 HR, hazard ratio; CI, confidence interval.  
4  
5  
6  
7  
8  
9  
10  
11  
12  
13  
14  
15  
16  
17  
18  
19  
20  
21  
22  
23  
24  
25  
26  
27  
28  
29  
30  
31  
32  
33  
34  
35  
36  
37  
38  
39  
40  
41  
42  
43  
44  
45  
46  
47

For peer review only

1  
2  
3  
4  
5  
6  
7  
8  
9  
10  
11  
12  
13  
14  
15  
16  
17  
18  
19  
20  
21  
22  
23  
24  
25  
26  
27  
28  
29  
30  
31  
32  
33  
34  
35  
36  
37  
38  
39  
40  
41  
42  
43  
44  
45  
46  
47

**Table 3: Linear mixed models of longitudinal measurements of proCNP in 287 patients with STEMI.**

|                                    | <i>Univariate model</i> |         | <i>Multivariate model 1</i> |         | <i>Multivariate model 2</i> |         |
|------------------------------------|-------------------------|---------|-----------------------------|---------|-----------------------------|---------|
|                                    | Value (95% CI) / pmol/L | P Value | Value (95% CI) / pmol/L     | P Value | Value (95% CI) / pmol/L     | P Value |
| <b>Time (per time point)</b>       | -1.3 (-2.1 – -0.5)      | .001    | -0.25 (-1.8 – 1.3)          | .75     | -0.25 (-1.8 – 1.3)          | .76     |
| <b>Age (per year)</b>              | Variables not included  |         | 0.16 (0.02 – 0.30)          | .02     | 0.06 (-0.08 – 0.20)         | .39     |
| <b>Sex (effect of male sex)</b>    |                         |         | 4.5 (-0.6 – 9.6)            | .09     | 4.4 (-0.28 – 9.1)           | .07     |
| <b>Interaction of time and sex</b> |                         |         | -1.4 (-3.2 – 0.4)           | .13     | -1.4 (-3.2 – 0.36)          | .13     |
| <b>Chronic kidney disease</b>      |                         |         | Variables not included      |         | 19.7 (13.3 – 26.1)          | <.001   |
| <b>Hypertension</b>                | 4.5 (0.6 – 8.4)         | .03     |                             |         |                             |         |
| <b>Diabetes</b>                    | -4.0 (-9.7 – 1.7)       | .17     |                             |         |                             |         |
| <b>Peripheral artery disease</b>   | -5.1 (-13.9 – 3.7)      | .26     |                             |         |                             |         |
| <b>Stroke</b>                      | 2.7 (-5.3 – 10.7)       | .51     |                             |         |                             |         |

The table shows the associated estimated changes in proCNP concentration in pmol/L (95%CI) when each variable is entered in a linear mixed model. All variables included in the models are shown in the table.

CI, confidence interval.



1  
2  
3 **Figure 1. Study design.**  
4

5  
6 STEMI, ST-elevation myocardial infarction; CAG, coronary angiography; proCNP, pro-C-type natriuretic peptide (see  
7  
8 *Nomenclature*).  
9

10  
11  
12  
13  
14  
15 **Figure 2. Mortality rates for increased and normal proCNP in all patients and stratified by sex.**  
16

17  
18 Display of all-cause mortality rates for groups of normal vs. increased proCNP concentrations in plasma. Graphs of 30-  
19  
20 day and one-year mortality rate for all patients are shown in section A and B, respectively. Sex-specific 30-day and one-  
21  
22 year mortality rates are shown in section C and D, respectively. The numbers of patients at risk in subgroups are given  
23  
24 beneath each graph.  
25  
26  
27  
28  
29  
30

31 **Figure 3. Longitudinal concentrations of proCNP in plasma.**  
32

33  
34 Concentrations are shown as mean (point) and standard error of the mean (error bars). ProCNP concentrations over time  
35  
36 for 287 patients with STEMI are shown in section A. In section B, C, and D, these patients are grouped based on sex,  
37  
38 hypertension, and chronic kidney disease, respectively.  
39  
40  
41  
42  
43  
44  
45  
46  
47

# STUDY DESIGN

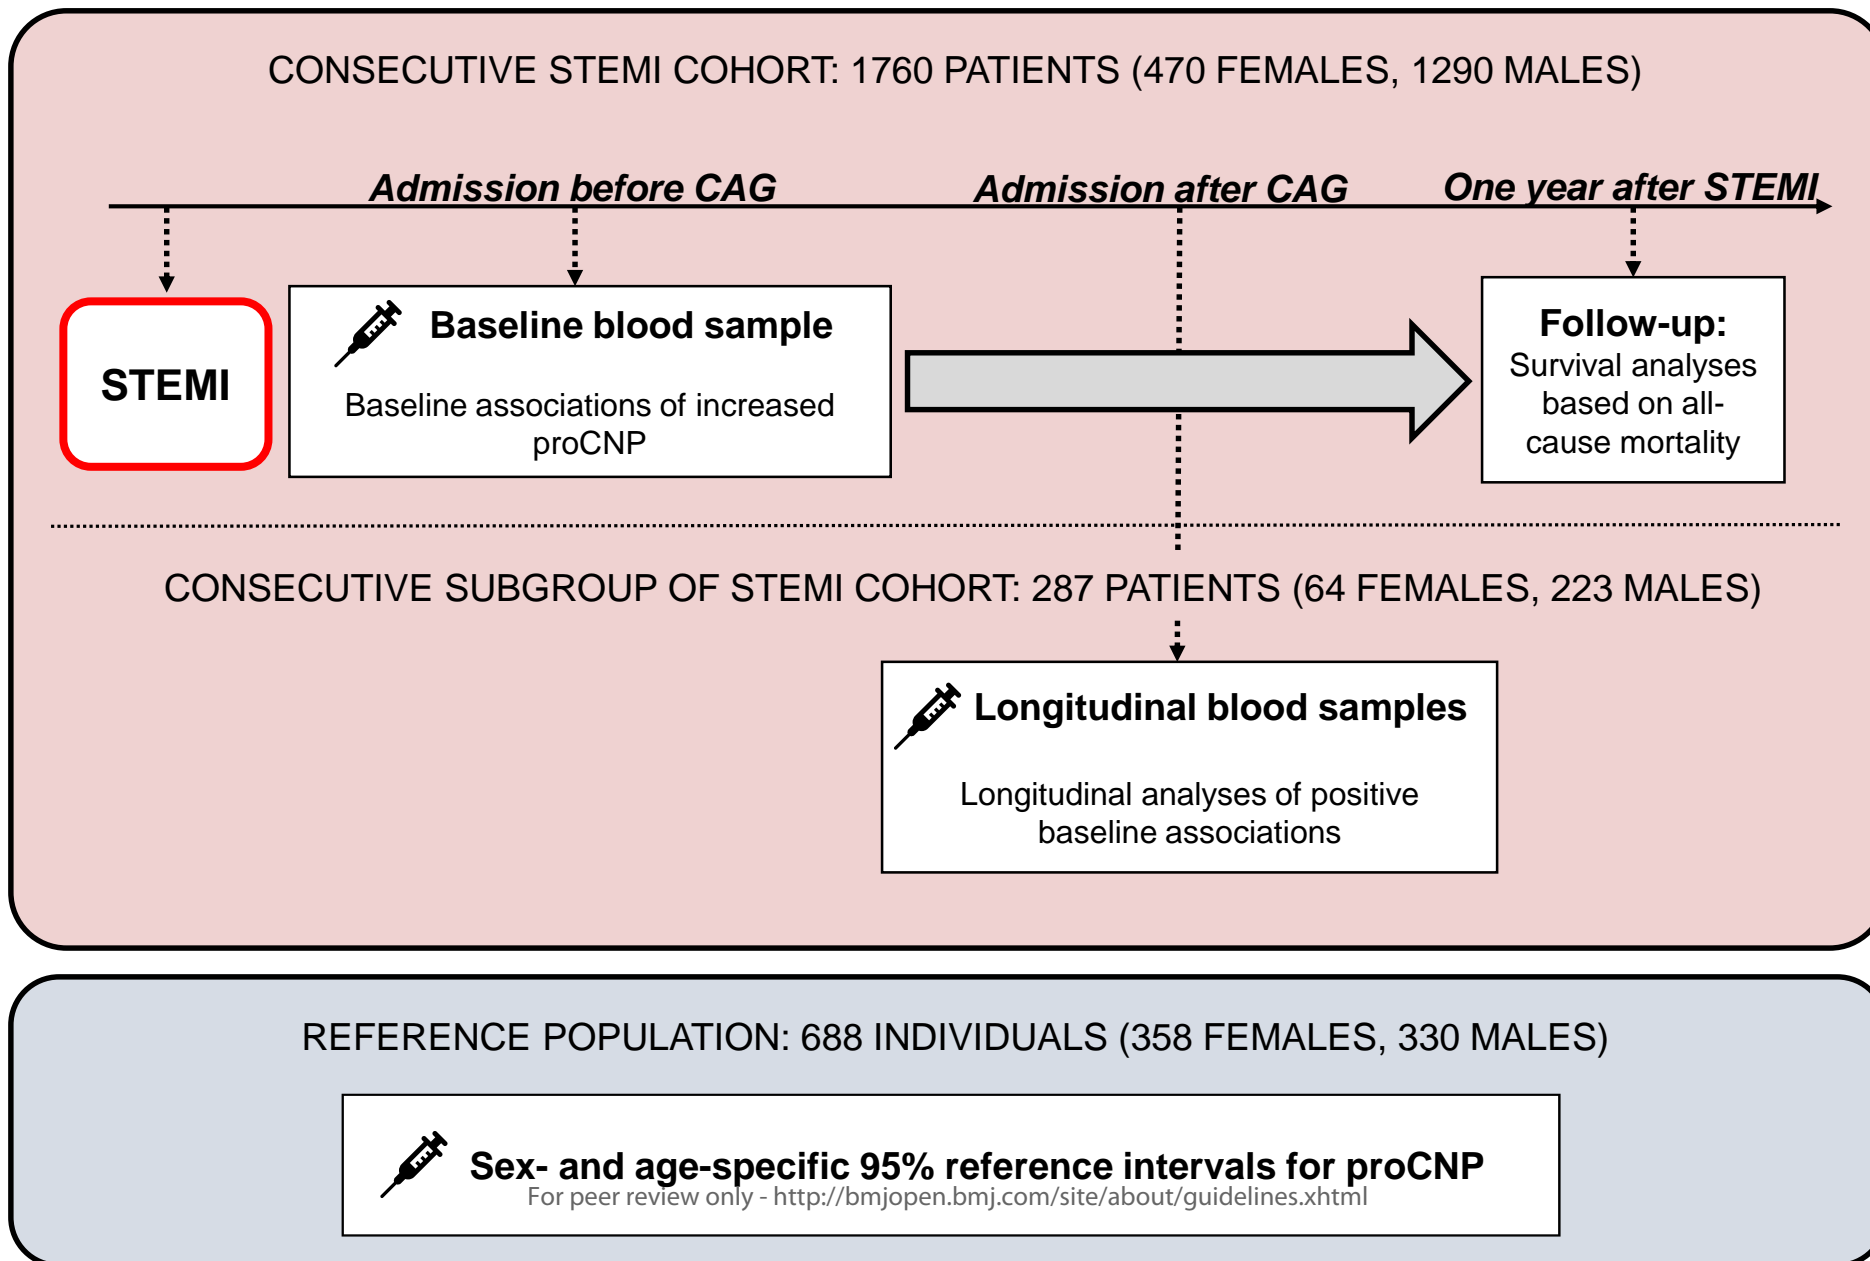

1  
2  
3  
4  
5  
6  
7  
8  
9  
10  
11  
12  
13  
14  
15  
16  
17  
18  
19  
20  
21  
22  
23  
24  
25  
26  
27  
28  
29  
30  
31  
32  
33  
34  
35  
36  
37  
38  
39  
40  
41

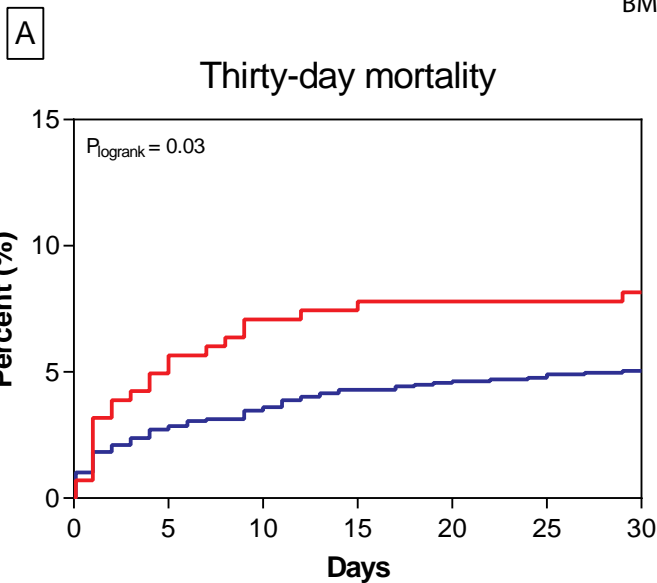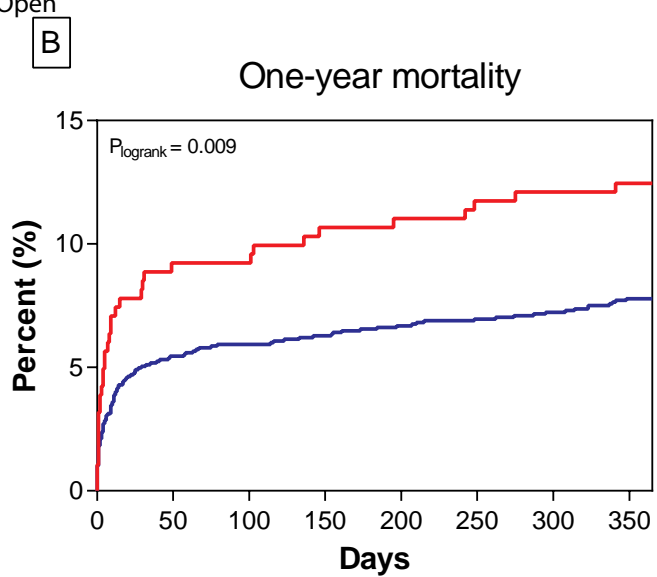

— Patients with increased proCNP  
— Patients with normal proCNP

No. at risk

|                                |      |      |      |      |      |      |      |
|--------------------------------|------|------|------|------|------|------|------|
| Patients with normal proCNP    | 1472 | 1426 | 1412 | 1400 | 1394 | 1391 | 1387 |
| Patients with increased proCNP | 283  | 267  | 261  | 259  | 258  | 258  | 256  |

|      |      |      |      |      |      |      |      |
|------|------|------|------|------|------|------|------|
| 1472 | 1381 | 1374 | 1369 | 1363 | 1359 | 1355 | 1347 |
| 283  | 253  | 253  | 249  | 248  | 246  | 245  | 244  |

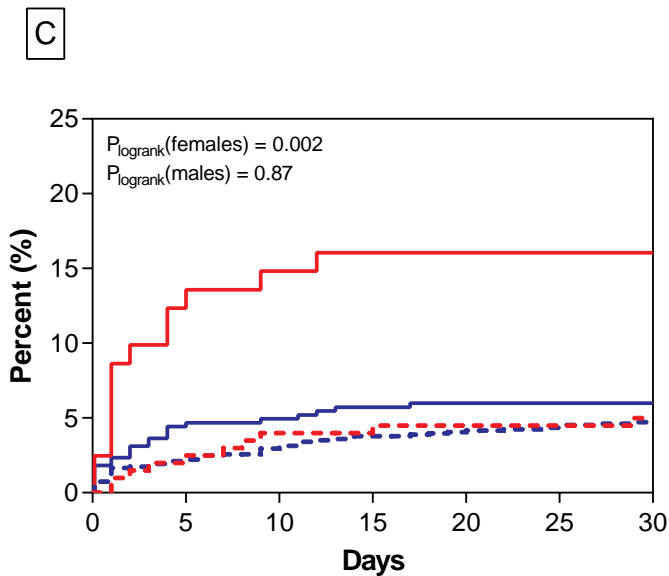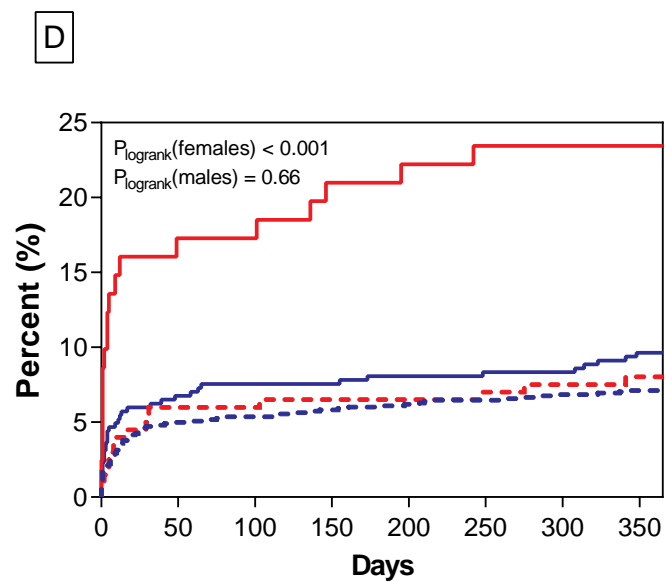

— Females with increased proCNP  
— Females with normal proCNP  
- - Males with increased proCNP  
- - Males with normal proCNP

No. at risk

|                               |      |      |      |      |      |      |      |
|-------------------------------|------|------|------|------|------|------|------|
| Females with normal proCNP    | 385  | 366  | 364  | 361  | 360  | 360  | 360  |
| Females with increased proCNP | 81   | 71   | 69   | 68   | 68   | 68   | 68   |
| Males with normal proCNP      | 1087 | 1060 | 1048 | 1039 | 1034 | 1029 | 1027 |
| Males with increased proCNP   | 202  | 196  | 192  | 191  | 190  | 190  | 188  |

|      |      |      |      |      |      |      |      |
|------|------|------|------|------|------|------|------|
| 385  | 357  | 354  | 354  | 352  | 351  | 351  | 346  |
| 81   | 67   | 67   | 64   | 63   | 62   | 62   | 62   |
| 1087 | 1024 | 1020 | 1015 | 1011 | 1008 | 1004 | 1001 |
| 202  | 186  | 186  | 185  | 185  | 184  | 183  | 182  |

A

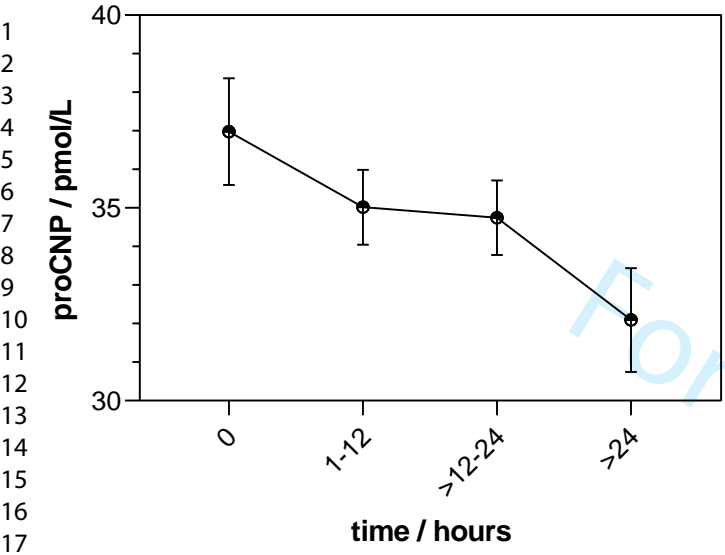

BMJ Open

B

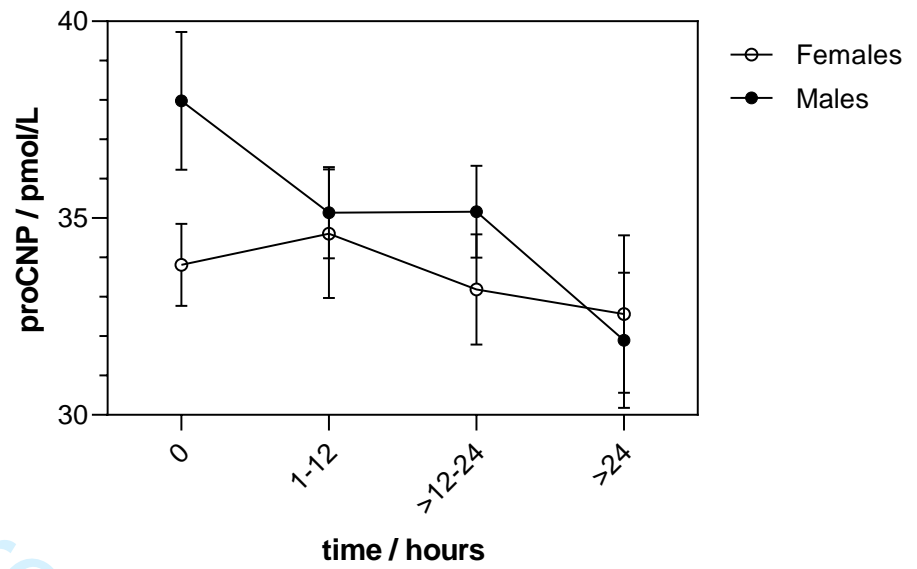

C

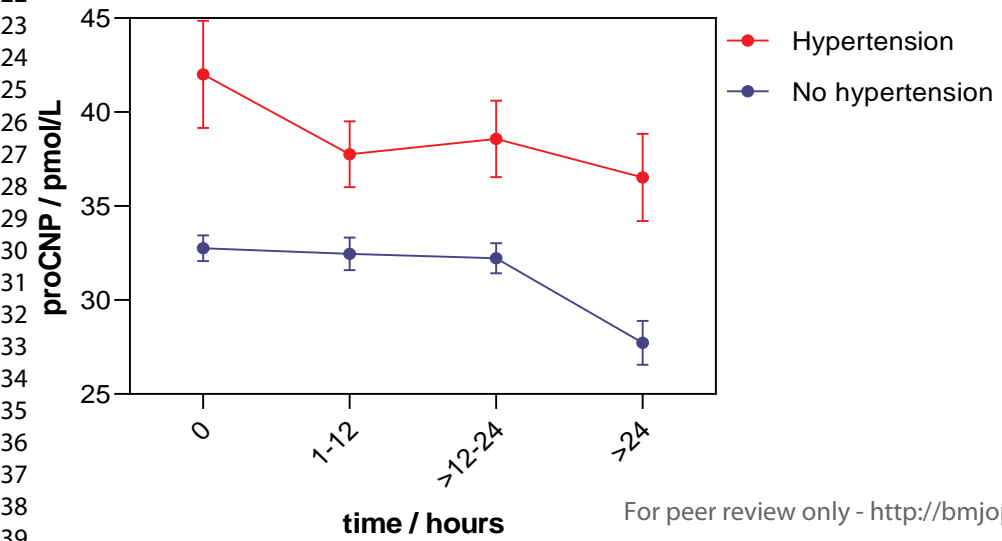

D

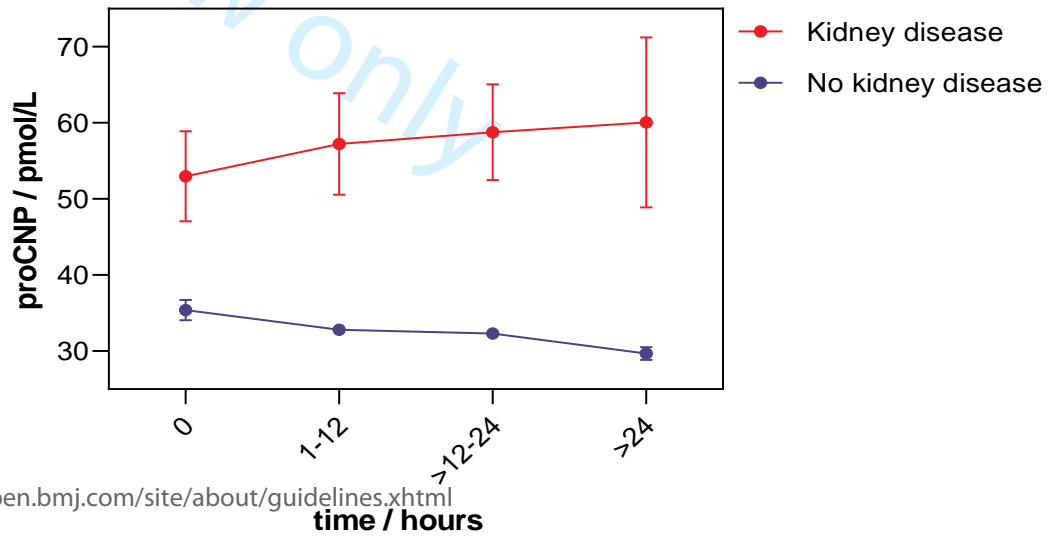

## Supplemental Material

### 2 METHODS

#### 3 COHORT OF PATIENTS WITH STEMI

4 Information on age, sex, height, body mass index (BMI), smoking status, development of  
5 cardiogenic shock, and cardiac arrest coma, time from onset of symptoms to blood sample,  
6 time from blood sample to percutaneous coronary intervention balloon angioplasty, number of  
7 coronary vessels affected (defined as the number coronary arteries with at least one stenosis  
8 of >70% of the lumen diameter (discrete values of zero to three) from the coronary  
9 angiography procedure (CAG)), culprit coronary vessel anatomy, Thrombolysis In Myocardial  
10 Infarction (TIMI ) grade flow, medical history, left ventricular ejection fraction (LVEF), and  
11 routine laboratory measurements was used in the data analyses. Blood samples for baseline  
12 biochemical measurements were collected from the femoral or radial sheath on admission  
13 immediately before CAG was performed. LVEF was determined by 2D echocardiography  
14 performed on admission or within 48 hours of admission. From a consecutive subgroup of the  
15 cohort, we collected repeated venous plasma samples during the first days after admission  
16 from January to March 2016 at Rigshospitalet (RH) for longitudinal assessment of potential  
17 changes in proCNP concentrations. Longitudinal plasma samples were collected at least  
18 twice within the first day of admission, and once daily in subsequent days of admission. All  
19 patients with longitudinal plasma samples are included in the analyses.

#### 20 BIOCHEMICAL ANALYSES

1  
2  
3  
4 1 Troponin T was measured in patients admitted to RH by Elecsys Troponin T hs assay  
5  
6 2 (Cobas, by Roche, Basel, Switzerland), whereas troponin I was measured in patients  
7  
8  
9 3 admitted to Odense Universitetshospital (OUH) using Architect *STAT* High Sensitive  
10  
11 4 Troponin-I (Abbott, Chicago, Illinois, United States). Both measurements from samples on  
12  
13 5 admission and measured peak values during admission (the latter as a proxy of myocardial  
14  
15 6 infarction size), were used in our statistical analyses. Plasma creatinine was measured using  
16  
17 7 CREP2 assay and high sensitivity C-reactive protein (hs-CRP) using CRPHS assay (Cobas,  
18  
19 8 by Roche, Basel, Switzerland). ST2 was measured by Presage ST2 Assay (Critical  
20  
21 9 Diagnostics, Inc., San Diego, California). We included measurement of soluble  
22  
23 10 thrombomodulin (sTM) and syndecan-1 as markers of endothelial cell and glycocalyx  
24  
25 11 damage, respectively. Assay procedures of sTM and syndecan-1 have been described  
26  
27 12 previously.[1] With regards to measurement of hs-CRP, the results were analyzed as the  
28  
29 13 proportion of patients with a concentration of  $\geq 2$ mg/L. This cut-off value has been introduced  
30  
31 14 as a definition of chronic inflammation in cardiac disease.[2] Moreover, patients with a time  
32  
33 15 from onset of symptoms to blood sample of  $\geq 6$  hours are excluded from hs-CRP analyses  
34  
35 16 because an increase in hs-CRP concentration can be expected due to myocardial  
36  
37 17 damage.[3,4] For measurement of syndecan-1, sTM, and hs-CRP, only patients admitted at  
38  
39 18 RH were analyzed. All biochemical analytes, apart from peak troponins and longitudinal  
40  
41 19 proCNP and proANP, were measured in blood samples collected on admission.  
42  
43  
44  
45  
46  
47  
48  
49 20  
50  
51

## 52 21 **RESULTS**

53  
54  
55  
56  
57  
58  
59  
60

## 1 PROCNP MEASUREMENT

2 Coefficients of variation of proCNP measurement in plasma were 13.8% for 20 pmol/L and  
3 13.1% for 40 pmol/L.

## 4 REFERENCE POPULATION AND STEMI COHORT

5 By inspection of histograms of proCNP concentrations, we concluded that there were no  
6 outliers among the individuals. Table 1 shows sex- and age-specific 95% reference intervals  
7 of proCNP concentrations in the reference population. Plasma concentrations in males were  
8 marginally higher compared to those in females ( $P = 0.015$ ). Women  $\geq 50$  years had higher  
9 proCNP concentrations compared to women  $< 50$  years ( $P = 0.011$ ), where no difference was  
10 observed among men ( $P = 0.44$ ). A flowchart of the inclusion of patients is shown in  
11 Supplemental Figure 1. The distributions of proCNP concentrations in the reference  
12 population and the STEMI cohort are shown in Supplemental Figure 2.

### 13 **Supplemental Figure 1: Flowchart of the inclusion of patients in study**

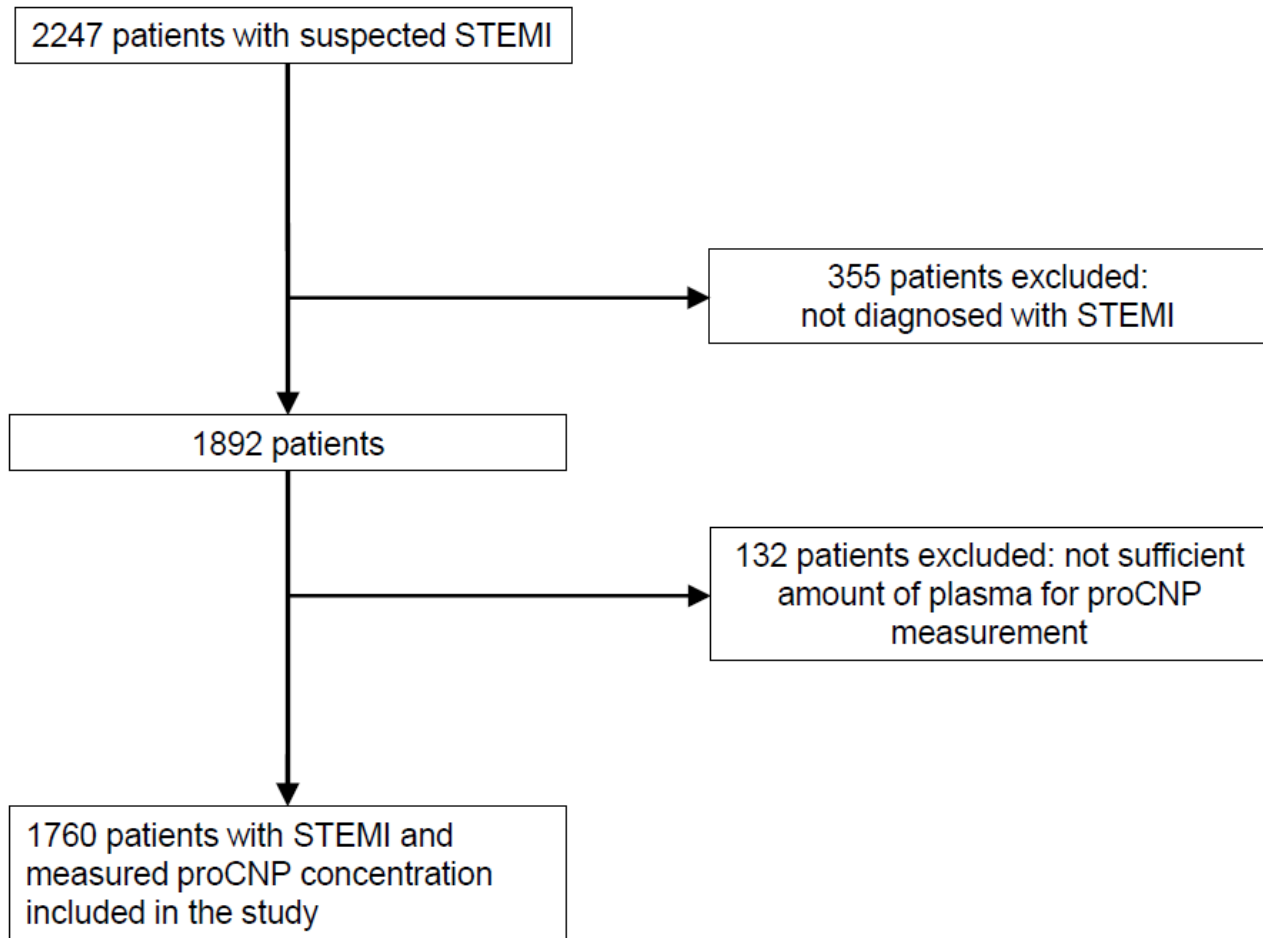

1  
2  
3  
4  
5  
6  
7  
8  
9  
10  
11  
12  
13  
14  
15  
16  
17  
18  
19  
20  
21  
22  
23  
24  
25  
26  
27  
28  
29  
30  
31  
32  
33  
34  
35  
36  
37  
38  
39  
40  
41  
42  
43  
44  
45  
46  
47  
48  
49  
50  
51  
52  
53  
54  
55  
56  
57  
58  
59  
60

**Supplemental Table 1. Reference intervals of proCNP in sex- and age-specific groups.**

| Age groups (years)            | Men         |             | Women       |             |
|-------------------------------|-------------|-------------|-------------|-------------|
|                               | <50         | ≥50         | <50         | ≥50         |
| <b>Number of subjects</b>     | 157         | 173         | 179         | 179         |
| <b>95% reference interval</b> | 10.2 – 52.2 | 13.9 – 49.6 | 13.6 – 48.9 | 13.4 – 49.4 |
| <b>Median</b>                 | 35.2        | 36.0        | 32.2        | 34.6        |



| Range | 4.4 – 55.4 | 11.4 – 52.4 | 8.2 – 55.4 | 4.4 – 60.0 |
|-------|------------|-------------|------------|------------|
|-------|------------|-------------|------------|------------|

1 Reference intervals, median, and range of proCNP concentrations of subgroups are all given

2 in pmol/L.

For peer review only

1  
2  
3  
4 **1 Supplemental Figure 2. Histograms of relative frequencies of plasma proCNP**  
5  
6  
7 **2 concentrations.**  
8  
9

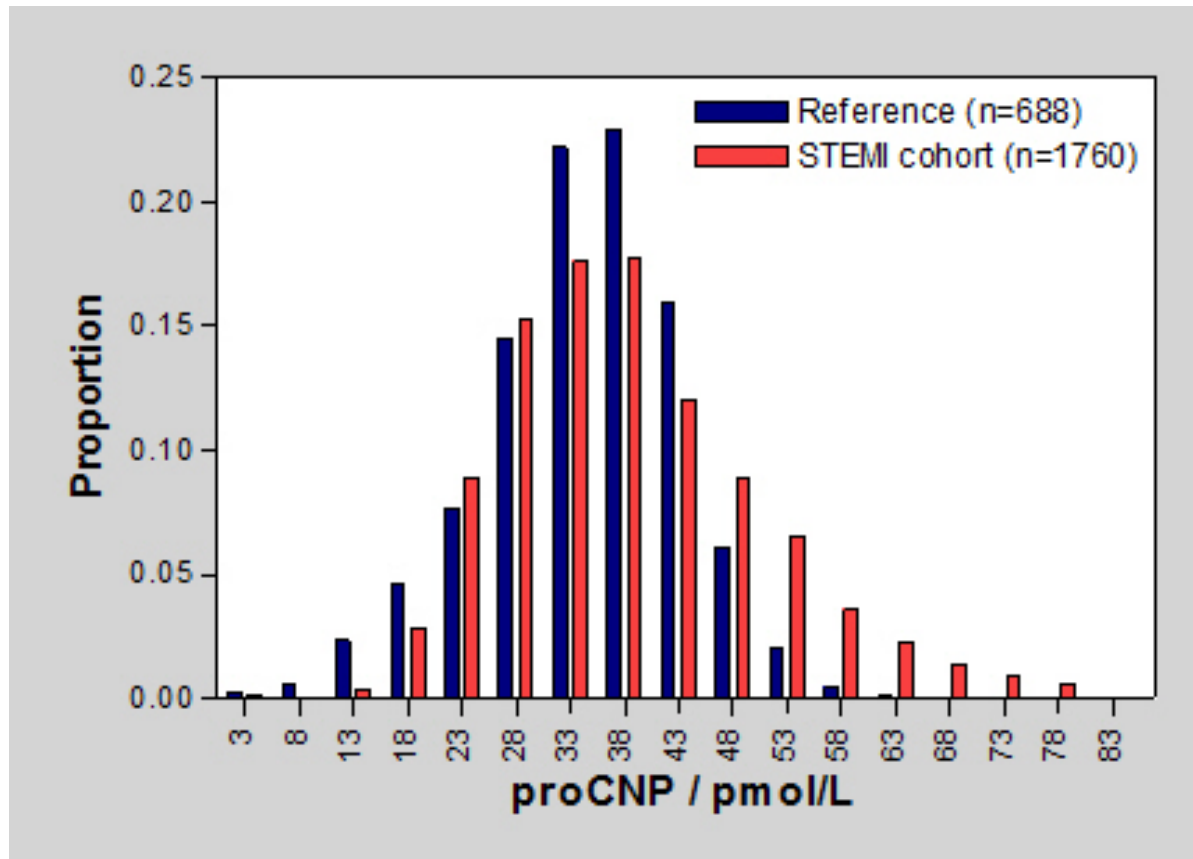

3  
4 The reference population is represented by blue bars and the STEMI cohort by red bars.

5 Each bar represents an interval of 5 pmol/L.

6 Values of >85 pmol/L are not shown.

7  
8 **Information from coronary angiography**

1  
2  
3  
4 1 In Supplemental Table 2 data from coronary angiography on culprit vessel, numbers of  
5  
6 2 coronary vessels affected and Thrombolysis in Myocardial Infarction (TIMI) grade flow is  
7  
8  
9 3 shown in all patients and sex-specifically.  
10  
11  
12  
13  
14  
15  
16  
17  
18  
19  
20  
21  
22  
23  
24  
25  
26  
27  
28  
29  
30  
31  
32  
33  
34  
35  
36  
37  
38  
39  
40  
41  
42  
43  
44  
45  
46  
47  
48  
49  
50  
51  
52  
53  
54  
55  
56  
57  
58  
59  
60

For peer review only

Supplemental Table 2. Culprit vessel, number of coronary vessels affected and Thrombolysis in Myocardial Infarction grade flow.

|                                                                | All patients (n = 1755) |                  |         | Females (n = 466) |                  |         | Males (n = 1289) |                  |         |
|----------------------------------------------------------------|-------------------------|------------------|---------|-------------------|------------------|---------|------------------|------------------|---------|
|                                                                | Normal proCNP           | Increased proCNP | P Value | Normal proCNP     | Increased proCNP | P Value | Normal proCNP    | Increased proCNP | P Value |
| <b>Culprit vessel</b>                                          |                         |                  |         |                   |                  |         |                  |                  |         |
| <b>None, n (%)</b>                                             | 55 (3.7)                | 7 (2.5)          | .38     | 21 (5.5)          | 5 (6.2)          | .79     | 34 (3.1)         | 2 (1.0)          | .10     |
| <b>Left main coronary artery, n (%)</b>                        | 31 (2.1)                | 5 (1.8)          | >.99    | 15 (3.9)          | 2 (2.5)          | .75     | 16 (1.5)         | 3 (1.5)          | >.99    |
| <b>Left anterior descending coronary artery, n (%)</b>         | 623 (42.3)              | 119 (42.0)       | .95     | 144 (37.4)        | 31 (38.3)        | .90     | 479 (44.1)       | 88 (43.6)        | .94     |
| <b>Right coronary artery, n (%)</b>                            | 529 (35.9)              | 115 (40.6)       | .14     | 148 (38.4)        | 34 (42.0)        | .62     | 381 (35.1)       | 81 (40.1)        | .18     |
| <b>Left circumflex, n (%)</b>                                  | 221 (15.0)              | 36 (12.7)        | .36     | 54 (14.0)         | 9 (11.1)         | .59     | 167 (15.4)       | 27 (13.4)        | .52     |
| <b>Graft, n (%)</b>                                            | 10 (0.7)                | 1 (0.4)          | >.99    | 1 (0.3)           | 0 (0)            | >.99    | 9 (0.8)          | 1 (0.5)          | >.99    |
| <b>Number of vessels affected</b>                              |                         |                  |         |                   |                  |         |                  |                  |         |
| <b>No-vessel disease, n (%)</b>                                | 29 (2.0)                | 2 (0.7)          | .21     | 14 (3.6)          | 2 (2.5)          | >.99    | 15 (1.4)         | 0 (0)            | .15     |
| <b>One-vessel disease, n (%)</b>                               | 903 (61.5)              | 172 (60.7)       | .84     | 243 (63.4)        | 46 (56.8)        | .31     | 660 (60.8)       | 126 (62.4)       | .70     |
| <b>Two-vessels disease, n (%)</b>                              | 333 (22.7)              | 61 (21.6)        | .76     | 75 (19.6)         | 20 (24.7)        | .29     | 258 (23.8)       | 41 (20.3)        | .32     |
| <b>Three-vessels disease, n (%)</b>                            | 204 (13.9)              | 48 (17.0)        | .20     | 51 (13.3)         | 13 (16.0)        | .48     | 153 (14.1)       | 35 (17.3)        | .23     |
| <b>Thrombolysis in Myocardial Infarction (TIMI) grade flow</b> |                         |                  |         |                   |                  |         |                  |                  |         |
| <b>0, n (%)</b>                                                | 96 (6.8)                | 21 (7.4)         | .60     | 28 (7.2)          | 8 (9.9)          | .49     | 68 (6.3)         | 13 (6.4)         | .88     |
| <b>1, n (%)</b>                                                | 6 (0.4)                 | 1 (0.4)          | >.99    | 1 (0.3)           | 0 (0)            | >.99    | 5 (0.5)          | 1 (0.5)          | >.99    |
| <b>2, n (%)</b>                                                | 49 (3.3)                | 7 (2.5)          | .58     | 17 (4.4)          | 2 (2.5)          | .55     | 32 (2.9)         | 5 (2.5)          | >.99    |
| <b>3, n (%)</b>                                                | 1321 (89.7)             | 254 (89.8)       | >.99    | 339 (88.1)        | 71 (87.7)        | .85     | 982 (90.3)       | 183 (90.6)       | >.99    |

## Cardiogenic shock development and cardiac arrest

When median proCNP concentrations were tested in patients with cardiogenic shock development vs. no cardiogenic shock development and cardiac arrest coma vs. no cardiac arrest coma or cardiogenic shock development, no differences were observed ( $P = 0.41$  and  $P = 0.28$  for females, respectively, and  $P = 0.97$  and  $P = 0.46$  for males, respectively).

## Time from onset of symptoms to blood sample and correlation of biochemical markers

In Supplemental Figure 3, median plasma proCNP concentrations are shown in subgroups of different time intervals from onset of symptoms to blood sample. A difference in proCNP was observed across subgroups ( $P < 0.001$ ). However, when patients with a time interval of >24 hours were excluded, no difference was found ( $P = 0.091$ ). Information on time from baseline blood sampling (performed when the CAG procedure was initiated) to percutaneous coronary intervention balloon angioplasty (time of reperfusion) was obtained on 862 patients (227 women, 635 men). Median (interquartile range) values in minutes were: 5 (4-9) and 5 (3-9) ( $P = 0.90$ ) for women with normal and increased proCNP respectively, and 6 (4-10) and 5 (4-10) ( $P = 0.17$ ) for men with normal and increased proCNP respectively. For biochemical markers with positive associations to proCNP, we performed Spearman's correlation analyses, and for proCNP vs. creatinine, proANP, syndecan-1, and sTM, Spearman  $r$  were 0.26, 0.082, 0.098, and 0.24, respectively ( $P < 0.001$  for all).

1  
2  
3  
4 **1 Supplemental Figure 3: Box-plots of proCNP concentrations in groups of time from**  
5  
6 **2 onset of symptoms to admission.**  
7  
8  
9

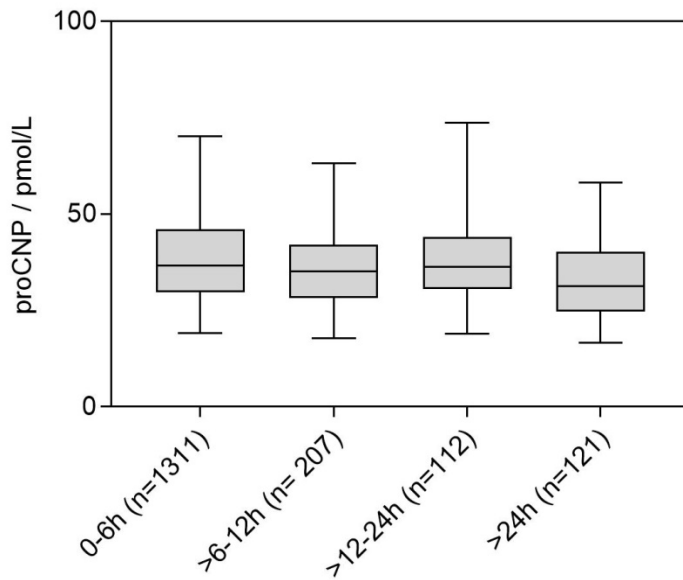

3  
4  
5  
6  
7  
8  
9  
10  
11  
12  
13  
14  
15  
16  
17  
18  
19  
20  
21  
22  
23  
24  
25  
26  
27  
28  
29  
30  
31  
32  
33  
34  
35  
36  
37  
38  
39  
40  
41  
42  
43  
44  
45  
46  
47  
48  
49  
50  
51  
52  
53  
54  
55  
56  
57  
58  
59  
60

3  
4 Boxes indicate median and inter-quartile range, and error bars indicate the interval from 2.5 to  
5 97.5 percentile.

6 **Sensitivity and specificity of increased proCNP and one-year mortality**

7 For one-year mortality, the sensitivity (defined as the proportion of patients that died, who had  
8 increased proCNP) vs. specificity (defined as the proportion of patients that survived, who had  
9 normal proCNP) were 34% vs. 85% for females and 17% vs. 84% for males.

10 **Multivariable Cox regression analyses**

1  
2  
3  
4 1 We examined the effect of proCNP concentrations as a continuous variable on the hazard  
5  
6 2 ratio (HR) of one-year all-cause death in all patients as well as females and males separately  
7  
8  
9 3 by cubic spline plots, using median concentrations as a reference point (shown in  
10  
11 4 Supplemental Figure 4). In females, there was no effect of proCNP below median  
12  
13 5 concentrations, whereas the estimated HR increased from approximately median  
14  
15 6 concentrations to the highest measured concentrations. In males, a trend towards a U-shaped  
16  
17 7 relation was observed with increasing estimated hazard ratios for decreases of proCNP below  
18  
19 8 median and for increases of proCNP above median. Based on these observations we focused  
20  
21 9 our Cox regression analyses on the upper range of proCNP, where we observed that  
22  
23 10 increasing proCNP was associated with increasing HR in both females and males.  
24  
25  
26  
27  
28  
29  
30

31 12 **Supplemental Figure 4: Cubic spline and density plots of hazard ratio and proCNP**  
32  
33 13 **concentrations.**  
34  
35  
36  
37  
38  
39  
40  
41  
42  
43  
44  
45  
46  
47  
48  
49  
50  
51  
52  
53  
54  
55  
56  
57  
58  
59  
60

1  
2  
3  
4  
5  
6  
7  
8  
9  
10  
11  
12  
13  
14  
15  
16  
17  
18  
19  
20  
21  
22  
23  
24  
25  
26  
27  
28  
29  
30  
31  
32  
33  
34  
35  
36  
37  
38  
39  
40  
41  
42  
43  
44  
45  
46  
47  
48  
49  
50  
51  
52  
53  
54  
55  
56  
57  
58  
59  
60

**Hazard ratio and density of proCNP in all patients with STEMI**

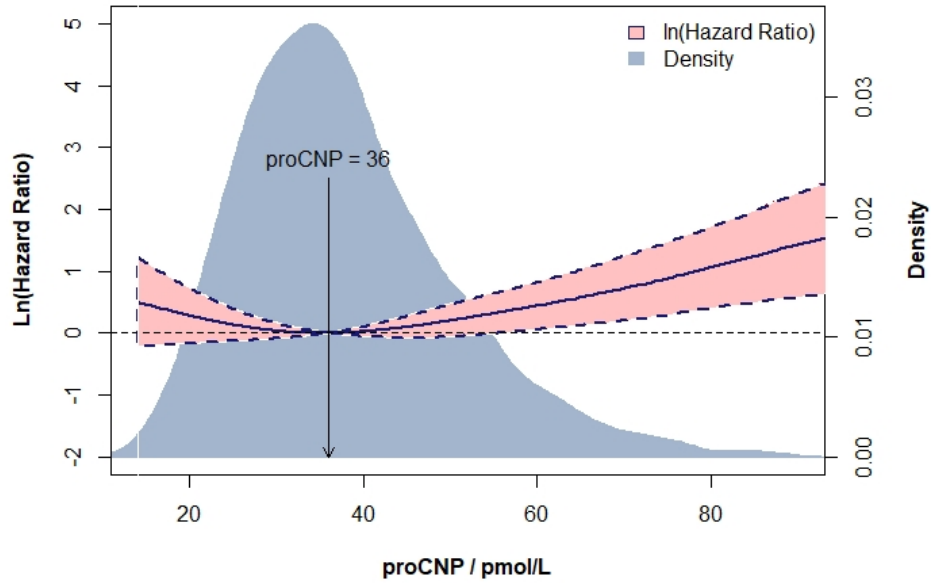

1

**Smooth HR and density of proCNP in women with STEMI**

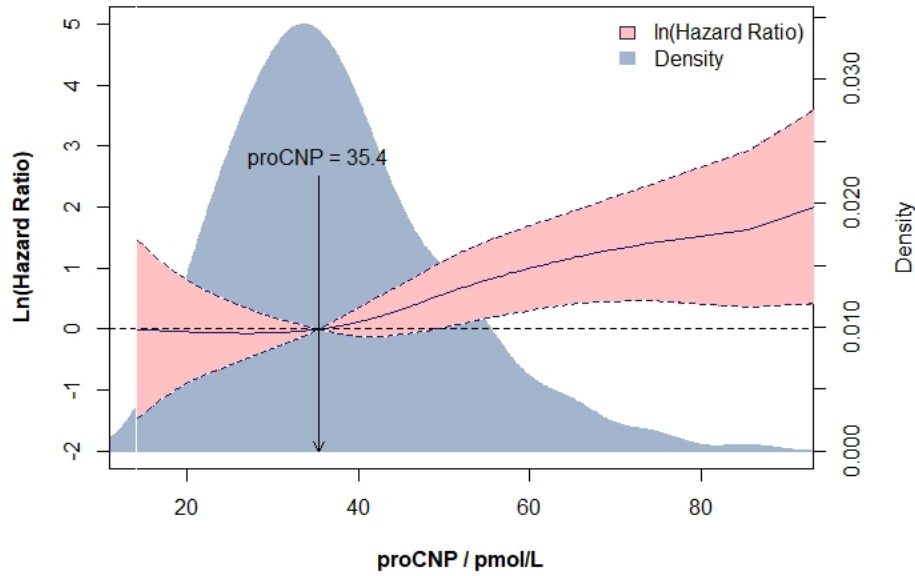

2



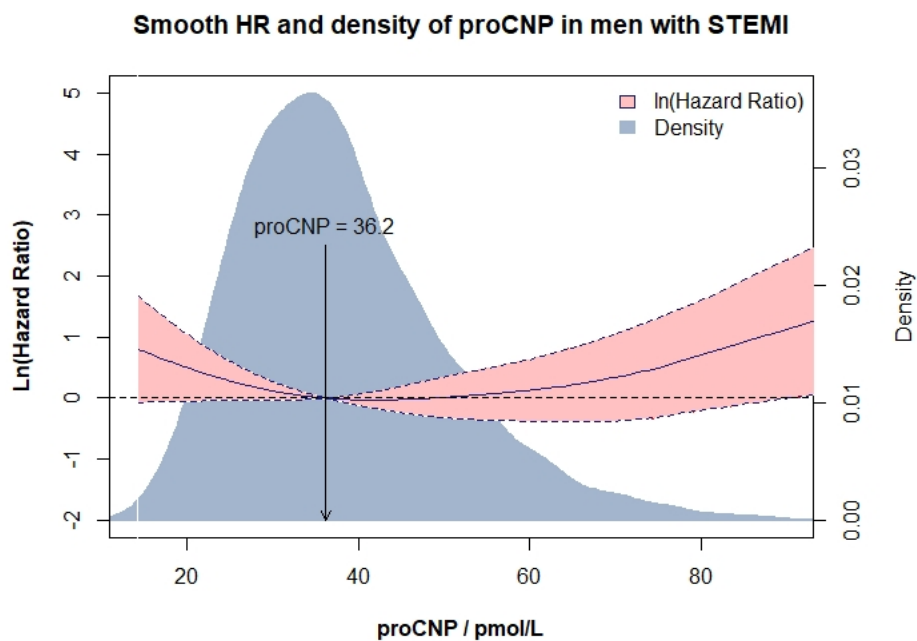

1

2

3

#### 4 Longitudinal plasma measurements

5 In Supplemental Table 3, the number of patients and samples in groups stratified according to  
6 diseases are shown. Longitudinal measurements of proANP are shown in Supplemental  
7 Figure 5, where the initial decrease from first (0 hours) to second (1-12 hours) timepoint is  
8 estimated to be ~850 pmol/L (~85%).

9

10 **Supplemental Table 3: Number of patients and plasma samples in longitudinal**  
11 **analyses.**

12

13

14

15

16

17

18

19

20

|                                  | <b>Number of patients</b><br>(females/males) | <b>Number of samples</b><br>(from females/from males) |
|----------------------------------|----------------------------------------------|-------------------------------------------------------|
| <b>Overall</b>                   | 287 (64/223)                                 | 907 (211/696)                                         |
| <b>Chronic kidney disease</b>    | 26 (6/20)                                    | 81 (20/61)                                            |
| <b>Hypertension</b>              | 131 (32/99)                                  | 412 (96/316)                                          |
| <b>Diabetes</b>                  | 34 (8/26)                                    | 107 (20/87)                                           |
| <b>Stroke</b>                    | 15 (5/10)                                    | 46 (16/30)                                            |
| <b>Peripheral artery disease</b> | 12 (2/10)                                    | 40 (6/34)                                             |

1  
2  
3  
4 **1 Supplemental Figure 5: Longitudinal concentrations of proANP in plasma.**  
5  
6  
7

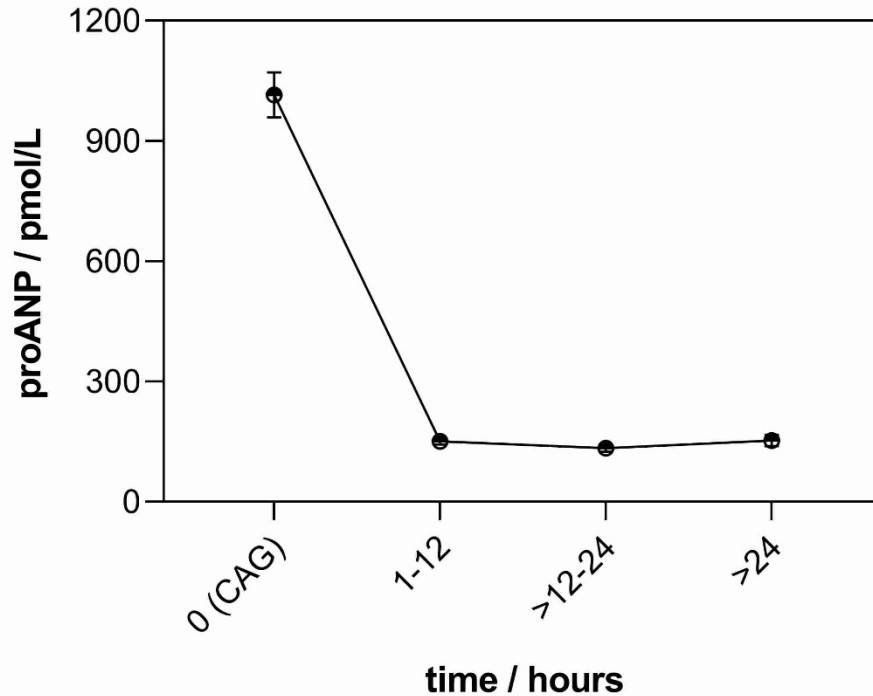

2  
3 Concentrations are shown as mean (SEM) for patients with longitudinal plasma samples.

#### 4 **DISCUSSION**

##### 5 *Assay Principle*

6 Our proCNP radioimmunoassay is developed in accordance with a processing-independent  
7 principle,[5,6] where different fragments of the prohormone of CNP can be accurately  
8 quantitated in circulation regardless of post-translational processing of the prohormone. Also,  
9 there is no cross-reactivity to the structurally related cardiac natriuretic propeptides.[7]

## 1 *Reference Intervals*

2 We based our calculated 95% reference intervals on two age groups of < and  $\geq$  50 years. The  
3 reason for choosing this division is a previous report showing that NT-proCNP concentrations  
4 in plasma in healthy individuals increase from  $\sim$ 50 years of age.[8] We therefore assume that  
5 the two age groups represent two different stages of adulthood with regard to circulating NT-  
6 proCNP concentrations and, hence, that the two age-specific intervals (for each sex)  
7 constitute a meaningful reference for interpretation of measured proCNP concentrations in the  
8 STEMI cohort.

## 9 *Time from onset of symptoms to blood sampling and balloon angioplasty*

10 In our baseline and multivariable Cox regressions analyses we have included the time from  
11 onset of symptoms as a variable, where we have data from the 99.5% of the included  
12 patients. Our results on time from blood sampling to balloon angioplasty (data was obtained  
13 from 49.1% of the included patients) show no differences in time between groups of normal  
14 and increased proCNP in both sexes, where the median time duration was 5-6 minutes in all  
15 groups. Assuming that the total ischemic time of the STEMI patients is equal to the time from  
16 onset of symptoms to balloon angioplasty (time of reperfusion), our analyses support that the  
17 time onset of symptoms to blood sampling as a variable also reflects the total ischemic time of  
18 the patients.

## 19 *Correlation Analyses of Biochemical Measurements*

20 Correlation analyses showed that the association of proCNP with sTM is superior in  
21 comparison to both that of syndecan-1 and proANP. A likely explanation may be that both

1  
2  
3  
4 1 proCNP and sTM are released from endothelial cells, whereas the glycocalyx and the  
5  
6 2 cardiomyocytes are the major sources of syndecan-1 and proANP, respectively. In contrast to  
7  
8 the vascular markers, however, no associations with markers of inflammation, hs-CRP, and  
9 3  
10 ST2 were observed. Thus, proCNP concentrations in plasma do not seem to be affected by  
11 4  
12  
13 5 general inflammation in patients with STEMI.  
14  
15

### 16 6 *Longitudinal Analyses*

17  
18  
19 7 Repeated measurements displayed a statistically significant decrease in proCNP  
20 8  
21 concentrations over time in a univariate analysis. For comparison we have included repeated  
22 9  
23 measurements of proANP, shown in Supplemental Figure 5. The dynamic response of  
24 10  
25 proANP differs markedly from proCNP with a steep decrease from 0 to 1-12 hours and a flat  
26 11  
27 curve from 1-12 to >24 hours. These differences highlight the distinct biological roles of CNP  
28 12  
29 vs. ANP.  
30  
31  
32  
33

34 13 For proCNP, both multivariate linear mixed models (Model 1 and 2) show that the effect of  
35 14  
36 time was reduced in magnitude and was non-significant, indicating that changes over time are  
37 15  
38 better explained by other variables than time per se. Model 1 found an independent effect of  
39 16  
40 age with higher concentrations of proCNP per year, but Model 2 found that the effect of age  
41 17  
42 disappeared when chronic kidney disease and other vascular diseases were included. Thus,  
43 18  
44 age per se does not seem to explain an increase in proCNP concentration; more likely,  
45 19  
46 chronic diseases (where prevalence increases with age) appear a confounder of the crude  
47 20  
48 effect of age. Although a statistically insignificant finding, Model 1 indicates an effect of male  
49 21  
50 sex and an interaction of sex and time that are unchanged after inclusion of chronic diseases  
51  
52  
53  
54  
55  
56  
57  
58  
59  
60

1  
2  
3  
4  
5  
6  
7  
8  
9  
10  
11  
12  
13  
14  
15  
16  
17  
18  
19  
20  
21  
22  
23  
24  
25  
26  
27  
28  
29  
30  
31  
32  
33  
34  
35  
36  
37  
38  
39  
40  
41  
42  
43  
44  
45  
46  
47  
48  
49  
50  
51  
52  
53  
54  
55  
56  
57  
58  
59  
60

1 in Model 2. Consistent with the effect of male sex are previously reported results[8] and the  
2 results of the reference population of the present study, where males have slightly higher  
3 concentrations of proCNP-derived peptides in the circulation. The possible interaction of sex  
4 and time, where males display a relative decrease over time compared with females, has not  
5 previously been reported. However, our longitudinal analyses lack the statistical power to  
6 sufficiently conclude on a potential interaction of sex and time on proCNP concentrations. In  
7 model 2, we find that chronic kidney disease and hypertension are independently associated  
8 with higher proCNP concentrations, consistent with baseline associations.

9 Of the (cardio)vascular diseases with a crude positive association to increased proCNP in  
10 baseline results, only hypertension is statistically independent in the multivariate repeated  
11 measurement analysis. Unexpectedly, the independent effects of diabetes mellitus and  
12 peripheral artery disease seem to be oppositely directed, where the diseases are  
13 independently associated with lower proCNP concentrations. However, these results were  
14 statistically insignificant, and further studies with more statistical power are needed to  
15 determine if such negative independent associations exist.

16



1  
2  
3  
4  
5  
6  
7  
8  
9  
10  
11  
12  
13  
14  
15  
16  
17  
18  
19  
20  
21  
22  
23  
24  
25  
26  
27  
28  
29  
30  
31  
32  
33  
34  
35  
36  
37  
38  
39  
40  
41  
42  
43  
44  
45  
46  
47  
48  
49  
50  
51  
52  
53  
54  
55  
56  
57  
58  
59  
60

1 (Oxf) 2013;**78**:783–9. doi:10.1111/cen.12035

2

For peer review only



STROBE Statement—Checklist of items that should be included in reports of *cohort studies*

|                              | Item No | Recommendation                                                                                                                                                                                                                                                                                                         | Page No                                               |
|------------------------------|---------|------------------------------------------------------------------------------------------------------------------------------------------------------------------------------------------------------------------------------------------------------------------------------------------------------------------------|-------------------------------------------------------|
| <b>Title and abstract</b>    | 1       | (a) Indicate the study's design with a commonly used term in the title or the abstract<br>(b) Provide in the abstract an informative and balanced summary of what was done and what was found                                                                                                                          | 1<br>3-4                                              |
| <b>Introduction</b>          |         |                                                                                                                                                                                                                                                                                                                        |                                                       |
| Background/rationale         | 2       | Explain the scientific background and rationale for the investigation being reported                                                                                                                                                                                                                                   | 7-8                                                   |
| Objectives                   | 3       | State specific objectives, including any prespecified hypotheses                                                                                                                                                                                                                                                       | 7-8                                                   |
| <b>Methods</b>               |         |                                                                                                                                                                                                                                                                                                                        |                                                       |
| Study design                 | 4       | Present key elements of study design early in the paper                                                                                                                                                                                                                                                                | 8-12                                                  |
| Setting                      | 5       | Describe the setting, locations, and relevant dates, including periods of recruitment, exposure, follow-up, and data collection                                                                                                                                                                                        | 8-11                                                  |
| Participants                 | 6       | (a) Give the eligibility criteria, and the sources and methods of selection of participants. Describe methods of follow-up<br>(b) For matched studies, give matching criteria and number of exposed and unexposed                                                                                                      | 8-10                                                  |
| Variables                    | 7       | Clearly define all outcomes, exposures, predictors, potential confounders, and effect modifiers. Give diagnostic criteria, if applicable                                                                                                                                                                               | 8-11 +<br>suppl.                                      |
| Data sources/<br>measurement | 8*      | For each variable of interest, give sources of data and details of methods of assessment (measurement). Describe comparability of assessment methods if there is more than one group                                                                                                                                   | 8-10 +<br>suppl.                                      |
| Bias                         | 9       | Describe any efforts to address potential sources of bias                                                                                                                                                                                                                                                              | -                                                     |
| Study size                   | 10      | Explain how the study size was arrived at                                                                                                                                                                                                                                                                              | 8                                                     |
| Quantitative variables       | 11      | Explain how quantitative variables were handled in the analyses. If applicable, describe which groupings were chosen and why                                                                                                                                                                                           | 10-11                                                 |
| Statistical methods          | 12      | (a) Describe all statistical methods, including those used to control for confounding<br>(b) Describe any methods used to examine subgroups and interactions<br>(c) Explain how missing data were addressed<br>(d) If applicable, explain how loss to follow-up was addressed<br>(e) Describe any sensitivity analyses | 10-12<br>+<br>suppl.                                  |
| <b>Results</b>               |         |                                                                                                                                                                                                                                                                                                                        |                                                       |
| Participants                 | 13*     | (a) Report numbers of individuals at each stage of study—eg numbers potentially eligible, examined for eligibility, confirmed eligible, included in the study, completing follow-up, and analysed<br><br>(b) Give reasons for non-participation at each stage<br>(c) Consider use of a flow diagram                    | 12-15<br>+<br>table<br>1-2 +<br>figure<br>1<br>+suppl |
| Descriptive data             | 14*     | (a) Give characteristics of study participants (eg demographic, clinical, social) and information on exposures and potential confounders                                                                                                                                                                               | 12-15<br>+<br>table<br>1-2 +<br>figure<br>1           |

1  
2  
3  
4  
5  
6  
7  
8  
9  
10  
11  
12  
13  
14  
15  
16  
17  
18  
19  
20  
21  
22  
23  
24  
25  
26  
27  
28  
29  
30  
31  
32  
33  
34  
35  
36  
37  
38  
39  
40  
41  
42  
43  
44  
45  
46  
47  
48  
49  
50  
51  
52  
53  
54  
55  
56  
57  
58  
59  
60

|              |     |                                                                                                                                                    |                             |
|--------------|-----|----------------------------------------------------------------------------------------------------------------------------------------------------|-----------------------------|
|              |     | (b) Indicate number of participants with missing data for each variable of interest<br>(c) Summarise follow-up time (eg, average and total amount) | +suppl                      |
| Outcome data | 15* | Report numbers of outcome events or summary measures over time                                                                                     | table 2<br>+<br>figure<br>1 |

For peer review only

|                                                       |                          |    |                                                                                                                                                                                                                                                                                                                                                                                                                   |                                                         |
|-------------------------------------------------------|--------------------------|----|-------------------------------------------------------------------------------------------------------------------------------------------------------------------------------------------------------------------------------------------------------------------------------------------------------------------------------------------------------------------------------------------------------------------|---------------------------------------------------------|
| 1<br>2<br>3<br>4<br>5<br>6<br>7<br>8<br>9<br>10<br>11 | Main results             | 16 | (a) Give unadjusted estimates and, if applicable, confounder-adjusted estimates and their precision (eg, 95% confidence interval). Make clear which confounders were adjusted for and why they were included<br><br>(b) Report category boundaries when continuous variables were categorized<br>(c) If relevant, consider translating estimates of relative risk into absolute risk for a meaningful time period | 12-15<br>+<br>table<br>1-2 +<br>figure<br>1<br>+suppl   |
| 12<br>13<br>14<br>15<br>16<br>17<br>18                | Other analyses           | 17 | Report other analyses done—eg analyses of subgroups and interactions, and sensitivity analyses                                                                                                                                                                                                                                                                                                                    | 12-15<br>+<br>table<br>1-2 +<br>figure<br>1-2<br>+suppl |
| 19                                                    | <b>Discussion</b>        |    |                                                                                                                                                                                                                                                                                                                                                                                                                   |                                                         |
| 20                                                    | Key results              | 18 | Summarise key results with reference to study objectives                                                                                                                                                                                                                                                                                                                                                          | 15-19                                                   |
| 21<br>22<br>23                                        | Limitations              | 19 | Discuss limitations of the study, taking into account sources of potential bias or imprecision. Discuss both direction and magnitude of any potential bias                                                                                                                                                                                                                                                        | 18                                                      |
| 24<br>25                                              | Interpretation           | 20 | Give a cautious overall interpretation of results considering objectives, limitations, multiplicity of analyses, results from similar studies, and other relevant evidence                                                                                                                                                                                                                                        | 15-19                                                   |
| 26<br>27                                              | Generalisability         | 21 | Discuss the generalisability (external validity) of the study results                                                                                                                                                                                                                                                                                                                                             | 15-18                                                   |
| 28                                                    | <b>Other information</b> |    |                                                                                                                                                                                                                                                                                                                                                                                                                   |                                                         |
| 29<br>30<br>31<br>32                                  | Funding                  | 22 | Give the source of funding and the role of the funders for the present study and, if applicable, for the original study on which the present article is based                                                                                                                                                                                                                                                     |                                                         |

\*Give information separately for exposed and unexposed groups.

**Note:** An Explanation and Elaboration article discusses each checklist item and gives methodological background and published examples of transparent reporting. The STROBE checklist is best used in conjunction with this article (freely available on the Web sites of PLoS Medicine at <http://www.plosmedicine.org/>, Annals of Internal Medicine at <http://www.annals.org/>, and Epidemiology at <http://www.epidem.com/>). Information on the STROBE Initiative is available at <http://www.strobe-statement.org>.
