# Supplementary material for: Sex-specific mortality prediction by pro-C-type natriuretic peptide measurement in a prospective cohort of patients with ST-elevation myocardial infarction
Source: PubMed Central journal article supplement — BMJ Open. 2021 Sep 28;11(9):e048312. doi: 10.1136/bmjopen-2020-048312 (PMC8480007; doi:10.1136/bmjopen-2020-048312), 2021-09-28
Supplement: bmjopen-2020-048312supp001.pdf [file bmjopen-2020-048312supp001.pdf]

# 1 Supplemental Material

## 2 METHODS

### 3 COHORT OF PATIENTS WITH STEMI

4 Information on age, sex, height, body mass index (BMI), smoking status, development of  
5 cardiogenic shock, and cardiac arrest coma, time from onset of symptoms to blood sample,  
6 time from blood sample to percutaneous coronary intervention balloon angioplasty, number of  
7 coronary vessels affected (defined as the number coronary arteries with at least one stenosis  
8 of >70% of the lumen diameter (discrete values of zero to three) from the coronary  
9 angiography procedure (CAG)), culprit coronary vessel anatomy, Thrombolysis In Myocardial  
10 Infarction (TIMI ) grade flow, medical history, left ventricular ejection fraction (LVEF), and  
11 routine laboratory measurements was used in the data analyses. Blood samples for baseline  
12 biochemical measurements were collected from the femoral or radial sheath on admission  
13 immediately before CAG was performed. LVEF was determined by 2D echocardiography  
14 performed on admission or within 48 hours of admission. From a consecutive subgroup of the  
15 cohort, we collected repeated venous plasma samples during the first days after admission  
16 from January to March 2016 at Rigshospitalet (RH) for longitudinal assessment of potential  
17 changes in proCNP concentrations. Longitudinal plasma samples were collected at least  
18 twice within the first day of admission, and once daily in subsequent days of admission. All  
19 patients with longitudinal plasma samples are included in the analyses.

### 20 BIOCHEMICAL ANALYSES

1 Troponin T was measured in patients admitted to RH by Elecsys Troponin T hs assay  
2 (Cobas, by Roche, Basel, Switzerland), whereas troponin I was measured in patients  
3 admitted to Odense Universitetshospital (OUH) using Architect STAT High Sensitive  
4 Troponin-I (Abbott, Chicago, Illinois, United States). Both measurements from samples on  
5 admission and measured peak values during admission (the latter as a proxy of myocardial  
6 infarction size), were used in our statistical analyses. Plasma creatinine was measured using  
7 CREP2 assay and high sensitivity C-reactive protein (hs-CRP) using CRPHS assay (Cobas,  
8 by Roche, Basel, Switzerland). ST2 was measured by Presage ST2 Assay (Critical  
9 Diagnostics, Inc., San Diego, California). We included measurement of soluble  
10 thrombomodulin (sTM) and syndecan-1 as markers of endothelial cell and glycocalyx  
11 damage, respectively. Assay procedures of sTM and syndecan-1 have been described  
12 previously.[1] With regards to measurement of hs-CRP, the results were analyzed as the  
13 proportion of patients with a concentration of  $\geq 2$ mg/L. This cut-off value has been introduced  
14 as a definition of chronic inflammation in cardiac disease.[2] Moreover, patients with a time  
15 from onset of symptoms to blood sample of  $\geq 6$  hours are excluded from hs-CRP analyses  
16 because an increase in hs-CRP concentration can be expected due to myocardial  
17 damage.[3,4] For measurement of syndecan-1, sTM, and hs-CRP, only patients admitted at  
18 RH were analyzed. All biochemical analytes, apart from peak troponins and longitudinal  
19 proCNP and proANP, were measured in blood samples collected on admission.

20

## 21 **RESULTS**

## 1 PROCNP MEASUREMENT

2 Coefficients of variation of proCNP measurement in plasma were 13.8% for 20 pmol/L and  
3 13.1% for 40 pmol/L.

## 4 REFERENCE POPULATION AND STEMI COHORT

5 By inspection of histograms of proCNP concentrations, we concluded that there were no  
6 outliers among the individuals. Table 1 shows sex- and age-specific 95% reference intervals  
7 of proCNP concentrations in the reference population. Plasma concentrations in males were  
8 marginally higher compared to those in females ( $P = 0.015$ ). Women  $\geq 50$  years had higher  
9 proCNP concentrations compared to women  $< 50$  years ( $P = 0.011$ ), where no difference was  
10 observed among men ( $P = 0.44$ ). A flowchart of the inclusion of patients is shown in  
11 Supplemental Figure 1. The distributions of proCNP concentrations in the reference  
12 population and the STEMI cohort are shown in Supplemental Figure 2.

### 13 **Supplemental Figure 1: Flowchart of the inclusion of patients in study**

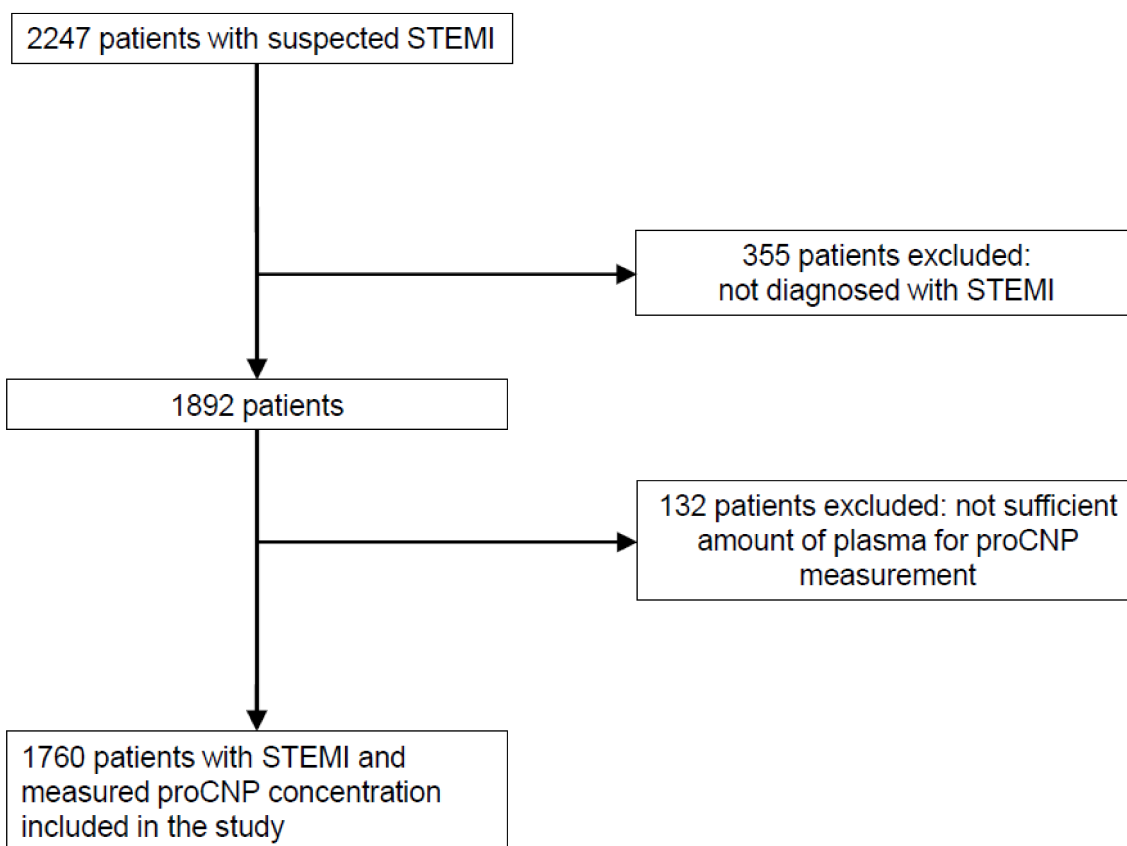

1  
2

3

4 **Supplemental Table 1. Reference intervals of proCNP in sex- and age-specific groups.**

| Age groups (years)            | Men         |             | Women       |             |
|-------------------------------|-------------|-------------|-------------|-------------|
|                               | <50         | ≥50         | <50         | ≥50         |
| <b>Number of subjects</b>     | 157         | 173         | 179         | 179         |
| <b>95% reference interval</b> | 10.2 – 52.2 | 13.9 – 49.6 | 13.6 – 48.9 | 13.4 – 49.4 |
| <b>Median</b>                 | 35.2        | 36.0        | 32.2        | 34.6        |

4

| Range | 4.4 – 55.4 | 11.4 – 52.4 | 8.2 – 55.4 | 4.4 – 60.0 |
|-------|------------|-------------|------------|------------|
|-------|------------|-------------|------------|------------|

- 1 Reference intervals, median, and range of proCNP concentrations of subgroups are all given
- 2 in pmol/L.

1 **Supplemental Figure 2. Histograms of relative frequencies of plasma proCNP**  
2 **concentrations.**

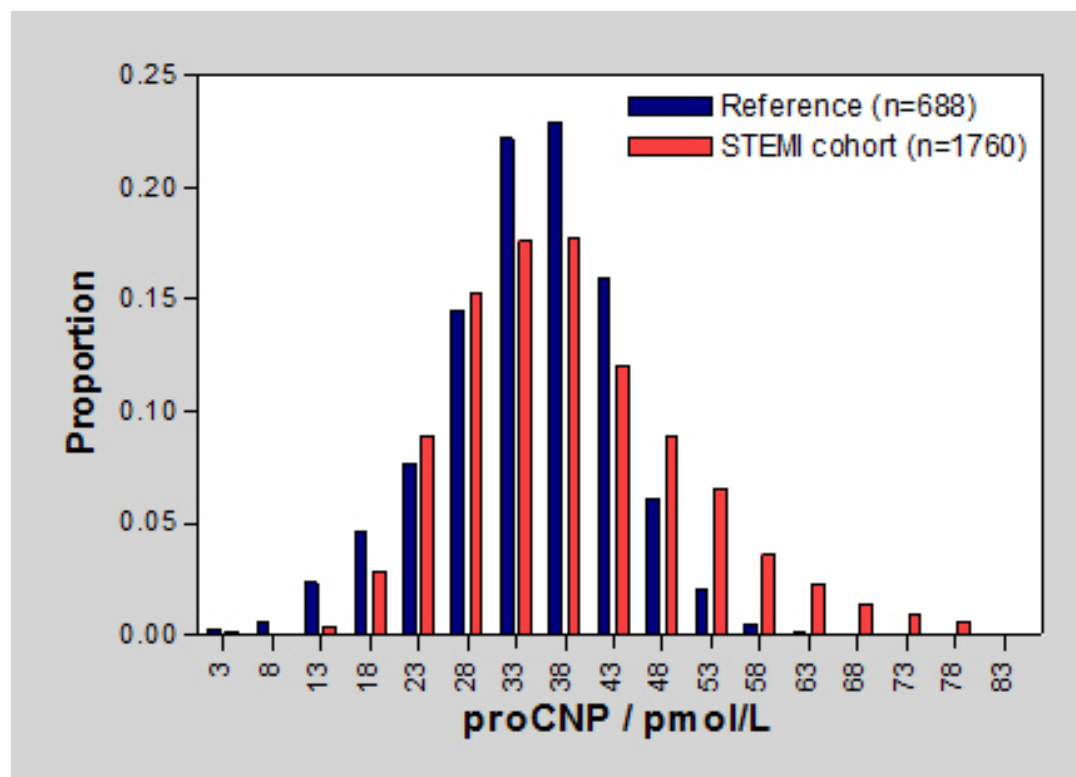

- 3
- 4 The reference population is represented by blue bars and the STEMI cohort by red bars.
- 5 Each bar represents an interval of 5 pmol/L.
- 6 Values of >85 pmol/L are not shown.
- 7
- 8 **Information from coronary angiography**

- 1 In Supplemental Table 2 data from coronary angiography on culprit vessel, numbers of
- 2 coronary vessels affected and Thrombolysis in Myocardial Infarction (TIMI) grade flow is
- 3 shown in all patients and sex-specifically.

1 **Supplemental Table 2. Culprit vessel, number of coronary vessels affected and Thrombolysis in Myocardial Infarction grade**  
 2 **flow.**

|                                                                | All patients (n = 1755) |                  |         | Females (n = 466) |                  |         | Males (n = 1289) |                  |         |
|----------------------------------------------------------------|-------------------------|------------------|---------|-------------------|------------------|---------|------------------|------------------|---------|
|                                                                | Normal proCNP           | Increased proCNP | P Value | Normal proCNP     | Increased proCNP | P Value | Normal proCNP    | Increased proCNP | P Value |
| <b>Culprit vessel</b>                                          |                         |                  |         |                   |                  |         |                  |                  |         |
| <b>None, n (%)</b>                                             | 55 (3.7)                | 7 (2.5)          | .38     | 21 (5.5)          | 5 (6.2)          | .79     | 34 (3.1)         | 2 (1.0)          | .10     |
| <b>Left main coronary artery, n (%)</b>                        | 31 (2.1)                | 5 (1.8)          | >.99    | 15 (3.9)          | 2 (2.5)          | .75     | 16 (1.5)         | 3 (1.5)          | >.99    |
| <b>Left anterior descending coronary artery, n (%)</b>         | 623 (42.3)              | 119 (42.0)       | .95     | 144 (37.4)        | 31 (38.3)        | .90     | 479 (44.1)       | 88 (43.6)        | .94     |
| <b>Right coronary artery, n (%)</b>                            | 529 (35.9)              | 115 (40.6)       | .14     | 148 (38.4)        | 34 (42.0)        | .62     | 381 (35.1)       | 81 (40.1)        | .18     |
| <b>Left circumflex, n (%)</b>                                  | 221 (15.0)              | 36 (12.7)        | .36     | 54 (14.0)         | 9 (11.1)         | .59     | 167 (15.4)       | 27 (13.4)        | .52     |
| <b>Graft, n (%)</b>                                            | 10 (0.7)                | 1 (0.4)          | >.99    | 1 (0.3)           | 0 (0)            | >.99    | 9 (0.8)          | 1 (0.5)          | >.99    |
| <b>Number of vessels affected</b>                              |                         |                  |         |                   |                  |         |                  |                  |         |
| <b>No-vessel disease, n (%)</b>                                | 29 (2.0)                | 2 (0.7)          | .21     | 14 (3.6)          | 2 (2.5)          | >.99    | 15 (1.4)         | 0 (0)            | .15     |
| <b>One-vessel disease, n (%)</b>                               | 903 (61.5)              | 172 (60.7)       | .84     | 243 (63.4)        | 46 (56.8)        | .31     | 660 (60.8)       | 126 (62.4)       | .70     |
| <b>Two-vessels disease, n (%)</b>                              | 333 (22.7)              | 61 (21.6)        | .76     | 75 (19.6)         | 20 (24.7)        | .29     | 258 (23.8)       | 41 (20.3)        | .32     |
| <b>Three-vessels disease, n (%)</b>                            | 204 (13.9)              | 48 (17.0)        | .20     | 51 (13.3)         | 13 (16.0)        | .48     | 153 (14.1)       | 35 (17.3)        | .23     |
| <b>Thrombolysis in Myocardial Infarction (TIMI) grade flow</b> |                         |                  |         |                   |                  |         |                  |                  |         |
| <b>0, n (%)</b>                                                | 96 (6.8)                | 21 (7.4)         | .60     | 28 (7.2)          | 8 (9.9)          | .49     | 68 (6.3)         | 13 (6.4)         | .88     |
| <b>1, n (%)</b>                                                | 6 (0.4)                 | 1 (0.4)          | >.99    | 1 (0.3)           | 0 (0)            | >.99    | 5 (0.5)          | 1 (0.5)          | >.99    |
| <b>2, n (%)</b>                                                | 49 (3.3)                | 7 (2.5)          | .58     | 17 (4.4)          | 2 (2.5)          | .55     | 32 (2.9)         | 5 (2.5)          | >.99    |
| <b>3, n (%)</b>                                                | 1321 (89.7)             | 254 (89.8)       | >.99    | 339 (88.1)        | 71 (87.7)        | .85     | 982 (90.3)       | 183 (90.6)       | >.99    |

3

4



1

## 2 **Cardiogenic shock development and cardiac arrest**

3 When median proCNP concentrations were tested in patients with cardiogenic shock  
4 development vs. no cardiogenic shock development and cardiac arrest coma vs. no cardiac  
5 arrest coma or cardiogenic shock development, no differences were observed ( $P = 0.41$  and  
6  $P = 0.28$  for females, respectively, and  $P = 0.97$  and  $P = 0.46$  for males, respectively).

7

## 8 **Time from onset of symptoms to blood sample and correlation of biochemical markers**

9 In Supplemental Figure 3, median plasma proCNP concentrations are shown in subgroups of  
10 different time intervals from onset of symptoms to blood sample. A difference in proCNP was  
11 observed across subgroups ( $P < 0.001$ ). However, when patients with a time interval of  $>24$   
12 hours were excluded, no difference was found ( $P = 0.091$ ). Information on time from baseline  
13 blood sampling (performed when the CAG procedure was initiated) to percutaneous coronary  
14 intervention balloon angioplasty (time of reperfusion) was obtained on 862 patients (227  
15 women, 635 men). Median (interquartile range) values in minutes were: 5 (4-9) and 5 (3-9) ( $P$   
16 = 0.90) for women with normal and increased proCNP respectively, and 6 (4-10) and 5 (4-10)  
17 ( $P = 0.17$ ) for men with normal and increased proCNP respectively. For biochemical markers  
18 with positive associations to proCNP, we performed Spearman's correlation analyses, and for  
19 proCNP vs. creatinine, proANP, syndecan-1, and sTM, Spearman  $r$  were 0.26, 0.082, 0.098,  
20 and 0.24, respectively ( $P < 0.001$  for all).

1 **Supplemental Figure 3: Box-plots of proCNP concentrations in groups of time from**  
2 **onset of symptoms to admission.**

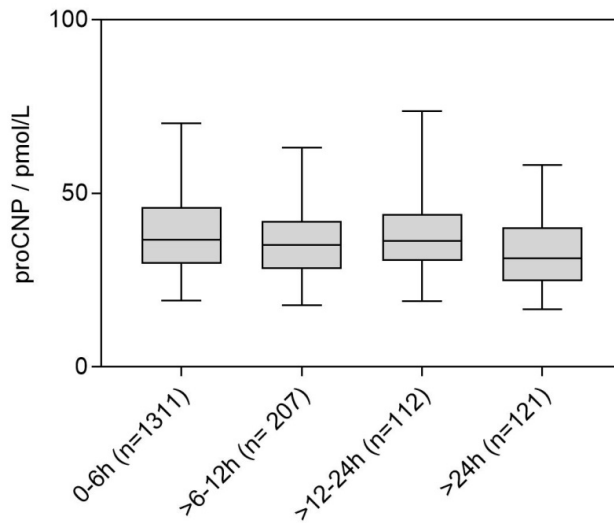

4 Boxes indicate median and inter-quartile range, and error bars indicate the interval from 2.5 to  
5 97.5 percentile.

6 **Sensitivity and specificity of increased proCNP and one-year mortality**

7 For one-year mortality, the sensitivity (defined as the proportion of patients that died, who had  
8 increased proCNP) vs. specificity (defined as the proportion of patients that survived, who had  
9 normal proCNP) were 34% vs. 85% for females and 17% vs. 84% for males.

10 **Multivariable Cox regression analyses**

1 We examined the effect of proCNP concentrations as a continuous variable on the hazard  
2 ratio (HR) of one-year all-cause death in all patients as well as females and males separately  
3 by cubic spline plots, using median concentrations as a reference point (shown in  
4 Supplemental Figure 4). In females, there was no effect of proCNP below median  
5 concentrations, whereas the estimated HR increased from approximately median  
6 concentrations to the highest measured concentrations. In males, a trend towards a U-shaped  
7 relation was observed with increasing estimated hazard ratios for decreases of proCNP below  
8 median and for increases of proCNP above median. Based on these observations we focused  
9 our Cox regression analyses on the upper range of proCNP, where we observed that  
10 increasing proCNP was associated with increasing HR in both females and males.

11

12 **Supplemental Figure 4: Cubic spline and density plots of hazard ratio and proCNP**  
13 **concentrations.**

**Hazard ratio and density of proCNP in all patients with STEMI**

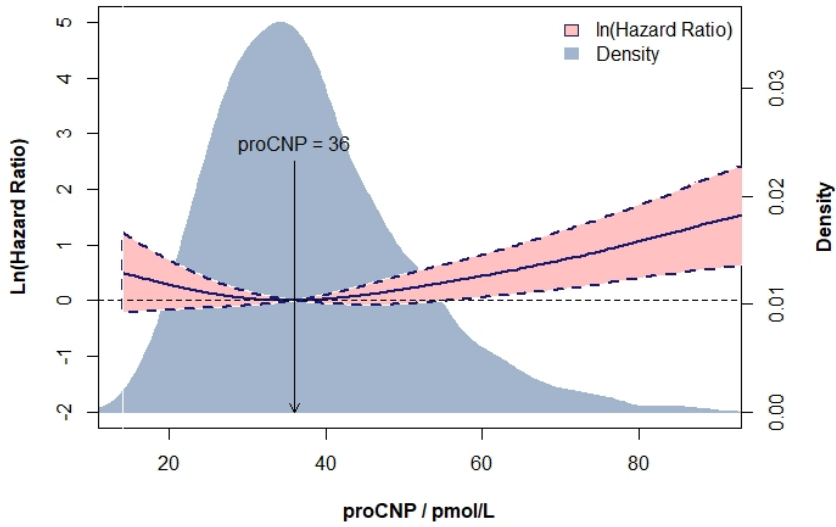

1

**Smooth HR and density of proCNP in women with STEMI**

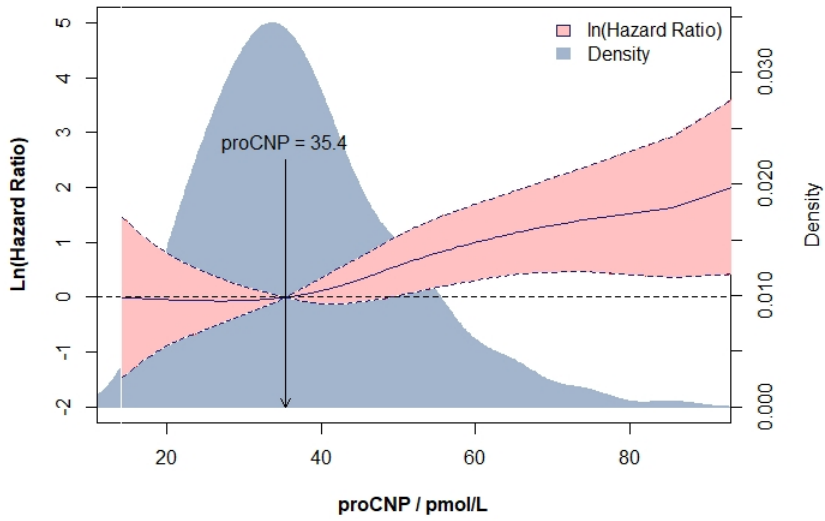

2

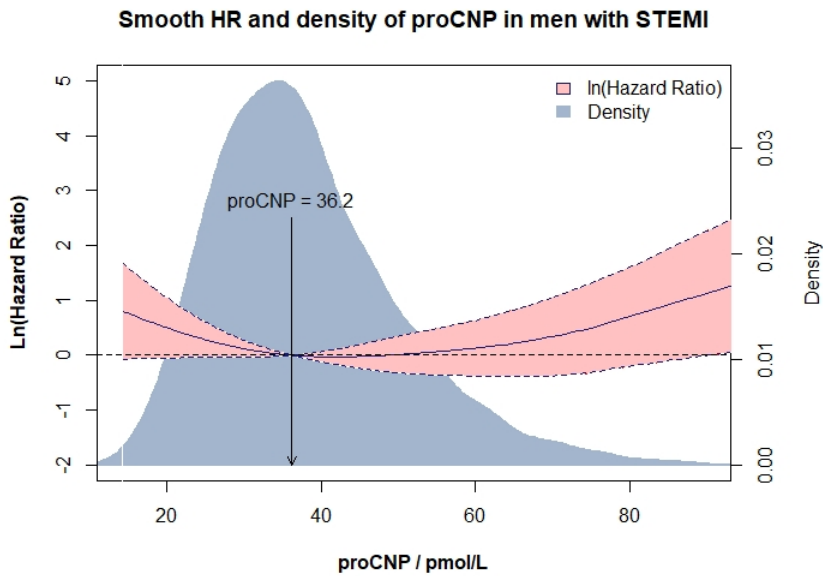

1

2

3

#### 4 Longitudinal plasma measurements

5 In Supplemental Table 3, the number of patients and samples in groups stratified according to  
6 diseases are shown. Longitudinal measurements of proANP are shown in Supplemental  
7 Figure 5, where the initial decrease from first (0 hours) to second (1-12 hours) timepoint is  
8 estimated to be ~850 pmol/L (~85%).

9

10 **Supplemental Table 3: Number of patients and plasma samples in longitudinal**  
11 **analyses.**

|                                  | <b>Number of patients</b><br>(females/males) | <b>Number of samples</b><br>(from females/from males) |
|----------------------------------|----------------------------------------------|-------------------------------------------------------|
| <b>Overall</b>                   | 287 (64/223)                                 | 907 (211/696)                                         |
| <b>Chronic kidney disease</b>    | 26 (6/20)                                    | 81 (20/61)                                            |
| <b>Hypertension</b>              | 131 (32/99)                                  | 412 (96/316)                                          |
| <b>Diabetes</b>                  | 34 (8/26)                                    | 107 (20/87)                                           |
| <b>Stroke</b>                    | 15 (5/10)                                    | 46 (16/30)                                            |
| <b>Peripheral artery disease</b> | 12 (2/10)                                    | 40 (6/34)                                             |

1

2

1 **Supplemental Figure 5: Longitudinal concentrations of proANP in plasma.**

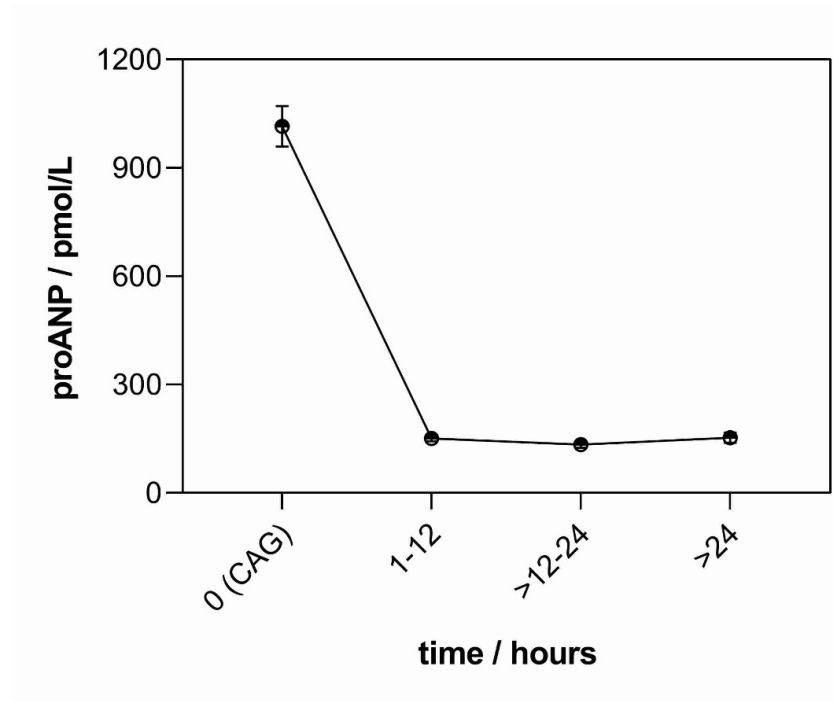

2

3 Concentrations are shown as mean (SEM) for patients with longitudinal plasma samples.

4 **DISCUSSION**

5 *Assay Principle*

6 Our proCNP radioimmunoassay is developed in accordance with a processing-independent  
7 principle,[5,6] where different fragments of the prohormone of CNP can be accurately  
8 quantitated in circulation regardless of post-translational processing of the prohormone. Also,  
9 there is no cross-reactivity to the structurally related cardiac natriuretic propeptides.[7]

10

### 1 *Reference Intervals*

2 We based our calculated 95% reference intervals on two age groups of < and  $\geq$  50 years. The  
3 reason for choosing this division is a previous report showing that NT-proCNP concentrations  
4 in plasma in healthy individuals increase from  $\sim$ 50 years of age.[8] We therefore assume that  
5 the two age groups represent two different stages of adulthood with regard to circulating NT-  
6 proCNP concentrations and, hence, that the two age-specific intervals (for each sex)  
7 constitute a meaningful reference for interpretation of measured proCNP concentrations in the  
8 STEMI cohort.

### 9 *Time from onset of symptoms to blood sampling and balloon angioplasty*

10 In our baseline and multivariable Cox regressions analyses we have included the time from  
11 onset of symptoms as a variable, where we have data from the 99.5% of the included  
12 patients. Our results on time from blood sampling to balloon angioplasty (data was obtained  
13 from 49.1% of the included patients) show no differences in time between groups of normal  
14 and increased proCNP in both sexes, where the median time duration was 5-6 minutes in all  
15 groups. Assuming that the total ischemic time of the STEMI patients is equal to the time from  
16 onset of symptoms to balloon angioplasty (time of reperfusion), our analyses support that the  
17 time onset of symptoms to blood sampling as a variable also reflects the total ischemic time of  
18 the patients.

### 19 *Correlation Analyses of Biochemical Measurements*

20 Correlation analyses showed that the association of proCNP with sTM is superior in  
21 comparison to both that of syndecan-1 and proANP. A likely explanation may be that both



1 proCNP and sTM are released from endothelial cells, whereas the glycocalyx and the  
2 cardiomyocytes are the major sources of syndecan-1 and proANP, respectively. In contrast to  
3 the vascular markers, however, no associations with markers of inflammation, hs-CRP, and  
4 ST2 were observed. Thus, proCNP concentrations in plasma do not seem to be affected by  
5 general inflammation in patients with STEMI.

### 6 *Longitudinal Analyses*

7 Repeated measurements displayed a statistically significant decrease in proCNP  
8 concentrations over time in a univariate analysis. For comparison we have included repeated  
9 measurements of proANP, shown in Supplemental Figure 5. The dynamic response of  
10 proANP differs markedly from proCNP with a steep decrease from 0 to 1-12 hours and a flat  
11 curve from 1-12 to >24 hours. These differences highlight the distinct biological roles of CNP  
12 vs. ANP.

13 For proCNP, both multivariate linear mixed models (Model 1 and 2) show that the effect of  
14 time was reduced in magnitude and was non-significant, indicating that changes over time are  
15 better explained by other variables than time per se. Model 1 found an independent effect of  
16 age with higher concentrations of proCNP per year, but Model 2 found that the effect of age  
17 disappeared when chronic kidney disease and other vascular diseases were included. Thus,  
18 age per se does not seem to explain an increase in proCNP concentration; more likely,  
19 chronic diseases (where prevalence increases with age) appear a confounder of the crude  
20 effect of age. Although a statistically insignificant finding, Model 1 indicates an effect of male  
21 sex and an interaction of sex and time that are unchanged after inclusion of chronic diseases

1 in Model 2. Consistent with the effect of male sex are previously reported results[8] and the  
2 results of the reference population of the present study, where males have slightly higher  
3 concentrations of proCNP-derived peptides in the circulation. The possible interaction of sex  
4 and time, where males display a relative decrease over time compared with females, has not  
5 previously been reported. However, our longitudinal analyses lack the statistical power to  
6 sufficiently conclude on a potential interaction of sex and time on proCNP concentrations. In  
7 model 2, we find that chronic kidney disease and hypertension are independently associated  
8 with higher proCNP concentrations, consistent with baseline associations.

9 Of the (cardio)vascular diseases with a crude positive association to increased proCNP in  
10 baseline results, only hypertension is statistically independent in the multivariate repeated  
11 measurement analysis. Unexpectedly, the independent effects of diabetes mellitus and  
12 peripheral artery disease seem to be oppositely directed, where the diseases are  
13 independently associated with lower proCNP concentrations. However, these results were  
14 statistically insignificant, and further studies with more statistical power are needed to  
15 determine if such negative independent associations exist.

16

## 1 References

- 2 1 Frydland M, Ostrowski SR, Møller JE, *et al.* Plasma concentration of biomarkers reflecting  
3 endothelial cell- and glycocalyx damage are increased in patients with suspected st-elevation  
4 myocardial infarction complicated by cardiogenic shock. *Shock* 2018;**50**:538–44.  
5 doi:10.1097/SHK.0000000000001123
- 6 2 Libby P, Ridker PM, Hansson GK. Inflammation in Atherosclerosis. From Pathophysiology to  
7 Practice. *J Am Coll Cardiol* 2009;**54**:2129–38. doi:10.1016/j.jacc.2009.09.009
- 8 3 Ramasamy I. Biochemical markers in acute coronary syndrome. *Clin Chim Acta*  
9 2011;**412**:1279–96. doi:10.1016/j.cca.2011.04.003
- 10 4 Cristell N, Cianflone D, Durante A, *et al.* High-sensitivity C-reactive protein is within normal  
11 levels at the very onset of first ST-segment elevation acute myocardial infarction in 41% of  
12 cases: A multiethnic case-control study. *J Am Coll Cardiol* 2011;**58**:2654–61.  
13 doi:10.1016/j.jacc.2011.08.055
- 14 5 Lippert SK, Rehfeld JF, Goetze JP. Processing-independent analysis for pro-C-type natriuretic  
15 peptide. *J Immunol Methods* 2010;**362**:32–7. doi:10.1016/j.jim.2010.08.003
- 16 6 Rehfeld J, Goetze J. The Posttranslational Phase of Gene Expression: New Possibilities in  
17 Molecular Diagnosis. *Curr Mol Med* 2005;**3**:25–38. doi:10.2174/1566524033361717
- 18 7 Nielsen SJ, Rehfeld JF, Goetze JP. Mismeasure of C-type natriuretic peptide [7]. *Clin. Chem.*  
19 2008;**54**:225–7. doi:10.1373/clinchem.2007.096172
- 20 8 Prickett TCR, Olney RC, Cameron VA, *et al.* Impact of age, phenotype and cardio-renal function  
21 on plasma C-type and B-type natriuretic peptide forms in an adult population. *Clin Endocrinol*

1 (Oxf) 2013;**78**:783–9. doi:10.1111/cen.12035

2
